# Supplementary material for: Synthesis of geminal bis- and tristriazoles: exploration of unconventional azide chemistry
Source: Royal Society of Chemistry journal article supplement (doi:10.1039/c5cc08163g), 2015-11-05
Supplement: c5cc08163g1.pdf [file c5cc08163g1.pdf]

# Synthesis of Geminal Tristriazoles: Exploration of Unconventional Azide Chemistry

Hellmuth Erhardt,<sup>1</sup> Fabian Mohr,<sup>2</sup> Stefan F. Kirsch<sup>1</sup>

<sup>1</sup>Organic Chemistry, Bergische Universität Wuppertal, Gaußstr. 20, 42119 Wuppertal, Germany

<sup>2</sup>Inorganic Chemistry, Bergische Universität Wuppertal, Gaußstr. 20, 42119 Wuppertal, Germany

## Supporting information

|                                                                                                                        |    |
|------------------------------------------------------------------------------------------------------------------------|----|
| General information.....                                                                                               | 1  |
| Experimental data.....                                                                                                 | 4  |
| Spectra ( <sup>1</sup> H-NMR, <sup>13</sup> C-NMR, <sup>15</sup> N-NMR, <sup>1</sup> H- <sup>15</sup> N HMBC, IR)..... | 24 |
| Crystallographic data.....                                                                                             | 59 |

**General.** All commercial reagents were used as received. Thin-layer chromatography (TLC) was conducted with precoated glass-backed plates (silica gel 60 F254) and visualized by exposure to UV light (254 nm) or stained with ceric ammonium molybdate (CAM), iodine chamber or by putting the developed chromatographic plates in a chlorine chamber and subsequent staining in a potassium iodide – starch solution. Flash chromatography was performed with silica gel (43-60 µm); the eluent used is reported in parentheses. <sup>1</sup>H-NMR spectra were recorded at 400 MHz or 600 MHz spectrometers. <sup>13</sup>C-NMR spectra were recorded at 101 MHz or 151 MHz. Chemical shifts are reported in ppm relative to the solvent signal. <sup>15</sup>N-NMR spectra were recorded at 61 MHz. Chemical shifts are reported in ppm relative to nitromethane as internal standard. Multiplicity is indicated as follows: s (singlet); d (doublet); t (triplet); q (quartet); m (multiplet). IR spectra were recorded using ATR technique. High resolution mass spectra were obtained using ESI ionization methods on a MicroTOF.

General procedure A for the CuAAC-reaction with ethyl 2,2-diazido-3-oxobutanoate for the preparation of geminal bistriazoles:

Ethyl 2,2-diazido-3-oxobutanoate was dissolved in a 4:1 mixture of *t*BuOH and Water to yield a 0.1 M solution. Alkyne (2.2 eq.), TBTA (3 mol%), copper(II)sulfate pentahydrate (20 mol%) and sodium ascorbate (42 mol%) were added and the reaction mixture stirred for 16 hours (overnight). The reaction mixture was quenched with a saturated, aqueous solution of EDTA disodium salt, stirred for an additional 20 minutes, and extracted with ethyl acetate. The combined organic phases were washed with brine and dried over sodium sulfate. Evaporation of the solvent *in vacuo* and column chromatography afforded the geminal bistriazoles.

General procedure B for the azidation of geminal bistriazoles:

The geminal bistriazole was dissolved in a 2:1 mixture of DMSO and Water to yield a 0.1 M solution. Sodium azide (10.0 eq.) and sodium iodide (20 mol%) were added to the stirred solution followed by IBX-SO<sub>3</sub>K (4.0 eq.). The solution was allowed to stir at room temperature until all of the starting material was consumed as indicated by TLC. Saturated, aqueous sodium thiosulfate was added and the reaction mixture diluted with water and extracted with ethyl acetate (3x). The combined organic phases were washed with brine and dried over sodium sulfate. Evaporation of the solvent *in vacuo* and column chromatography afforded the azidomethylenebistriazoles.

High resolution mass analysis data were acquired from the corresponding geminal tristriazoles.

General procedure C for the azidation of geminal bistriazoles:

The geminal bistriazole was dissolved in a 2:1 mixture of DMSO and Water to yield a 0.1 M solution. Sodium azide (10.0 eq.) and sodium iodide (20 mol%) were added to the stirred solution followed by IBX-SO<sub>3</sub>K (4.0 eq.). The solution was allowed to stir at 60 °C until all of the starting material was consumed as indicated by TLC. Saturated, aqueous sodium thiosulfate was added and the reaction mixture diluted with water and extracted with ethyl acetate (3x). The combined organic phases were washed with brine and dried over sodium sulfate. Evaporation of the solvent *in vacuo* and column chromatography afforded the azidomethylenebistriazoles.

General procedure D for the CuAAC-reaction with azidomethylenebistriazoles:

The azidomethylenebistriazole was dissolved in a 4:1 mixture of *t*BuOH and water to yield a 0.01 M solution. Alkyne (3.0 eq.), copper(II)sulfate pentahydrate (40 mol%) and sodium ascorbate (84 mol%) were added and the reaction mixture stirred for 16 hours (overnight). The reaction mixture was quenched with a saturated, aqueous solution of EDTA disodium salt, stirred for an additional 20 minutes, and extracted with ethyl acetate. The combined organic phases were washed with brine and dried over sodium sulfate. Evaporation of the solvent *in vacuo* gave the product upon precipitation by addition of a minimum amount of diethyl ether. The precipitant was collected and washed with a minimum amount of ethyl acetate, water and diethyl ether. Drying under high vacuum afforded the geminal tristriazole.

## Experimental data

### ethyl 2,2-diazido-3-oxobutanoate (1)

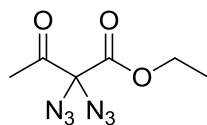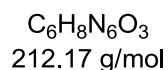

Ethyl acetoacetate (4.0 ml, 31.38 mmol) was dissolved in 200 ml DMSO and 100 ml Water. Sodium azide (20.401 g, 313.81 mmol, 10.0 eq.) and iodine (17.523 g, 69.04 mmol, 2.20 eq.) were added under ice cooling. The ice bath was removed after 5 minutes and the mixture stirred at room temperature for 2 hours. A saturated, aqueous solution of sodium thiosulfate was added and the reaction mixture diluted with water and extracted with diethyl ether (3x). The combined organic phases were washed with water and brine and dried over sodium sulfate. After the solvent was evaporated *in vacuo* the product was obtained as a colorless liquid (5.861 g, 27.62 mmol, 88%) upon purification by column chromatography (PE:Et<sub>2</sub>O = 100:0 → 90:10).

**TLC:** R<sub>f</sub> = 0.59 (PE:Et<sub>2</sub>O / 9:1, [iodine chamber]); **<sup>1</sup>H-NMR** (400 MHz, CDCl<sub>3</sub>): δ [ppm] 7.10 (q, *J* = 7.1 Hz, 2H), 2.28 (s, 3H), 1.36 (t, *J* = 7.1 Hz, 3H); **<sup>13</sup>C-NMR** (101 MHz, CDCl<sub>3</sub>): δ [ppm] 195.6, 164.3, 83.3, 64.3, 25.1, 14.1; **IR** (ATR): 2985, 2112, 1743, 1359, 1222, 1068, 1008, 942, 853, 747, 582, 544<sup>[1]</sup>.

### ethyl 2,2-bis(4,5,6,7,8,9-hexahydro-1*H*-cycloocta[*d*][1,2,3]triazol-1-yl)-3-oxobutanoate

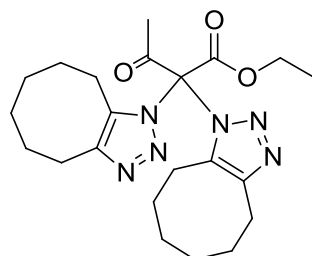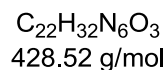

**1** (100 mg, 0.47 mmol) was dissolved in 5 ml and treated with cyclooctyne (112 mg, 1.04 mmol, 2.20 eq.). The solution was stirred for 16 hours at room temperature and directly subjected to column chromatography (PE:EtOAc = 70:30) after evaporation of the solvent *in vacuo*. The product was obtained as viscous oil (129 mg, 0.30 mmol, 64%).

**TLC:**  $R_f = 0.45$  (PE:EtOAc / 70:30, [UV]);  **$^1\text{H-NMR}$**  (600 MHz,  $\text{CDCl}_3$ ):  $\delta$  [ppm] 4.58-4.46 (m, 2H), 2.92-2.83 (m, 4H), 2.64-2.57 (m, 3H), 2.28-2.13 (m, 4H), 1.80-1.65 (m, 4H), 1.44-1.29 (m, 15H);  **$^{13}\text{C-NMR}$**  (151 MHz,  $\text{CDCl}_3$ ):  $\delta$  [ppm] 188.9, 161.7, 146.2, 136.6, 86.3, 64.8, 28.9, 27.6, 26.2, 25.7, 25.1, 24.4, 21.9, 13.8; **HRMS** (ESI): [m/z] calculated for  $[\text{C}_{22}\text{H}_{32}\text{N}_6\text{O}_3\text{Na}]$  451.2428, found 451.2408.

**dimethyl 1,1'-(2-ethoxy-2-oxoethane-1,1-diyl)bis(1H-1,2,3-triazole-4-carboxylate) (2a)**

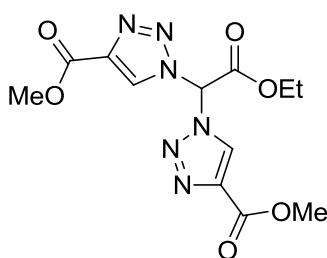

$\text{C}_{12}\text{H}_{14}\text{N}_6\text{O}_6$   
338.28 g/mol

Following the general procedure **A** (1.50 g of **1**, 0.1 M, overnight), dimethyl 1,1'-(2-ethoxy-2-oxoethane-1,1-diyl)bis(1H-1,2,3-triazole-4-carboxylate) was obtained as a viscous oil (1.707 g, 5.05 mmol, 71%) upon purification by column chromatography (PE:EtOAc / 60:40 → 50:50). The resulting viscous oil precipitates the product by addition of a small amount of diethyl ether, thus affording a white solid.

Single crystals suitable for crystal structure analysis were obtained by slow evaporation of a saturated solution in ethyl acetate.

**TLC:**  $R_f = 0.24$  (PE:EtOAc / 60:40, [CAM]);  **$^1\text{H-NMR}$**  (600 MHz,  $\text{CDCl}_3$ ):  $\delta$  [ppm] 8.60 (s, 2H), 7.78 (s, 1H), 4.42 (q,  $J = 7.1$  Hz, 2H), 3.96 (s, 6H), 1.30 (t,  $J = 7.1$  Hz, 3H);  **$^{13}\text{C-NMR}$**  (151 MHz,  $\text{CDCl}_3$ ):  $\delta$  [ppm] 161.2, 160.3, 141.1, 128.8, 70.7, 66.4, 52.7, 14.0;  **$^{15}\text{N-NMR}$**  (61 MHz,  $d_6$ -DMSO):  $\delta$  [ppm]

-13.3, -20.3 (d,  $J = 1.3$  Hz), -134.5 (dd,  $J = 2.0, 4.7$  Hz); **IR** (ATR): [ $\text{cm}^{-1}$ ] 3181, 3155, 2962, 1766, 1735, 1534, 1438, 1373, 1268, 1205, 1036 1018, 883, 825, 776, 763, 607, 531, 510; **HRMS** (ESI): [ $m/z$ ] calculated for [ $\text{C}_{12}\text{H}_{14}\text{N}_6\text{O}_6\text{Na}$ ] 361.0867, found 361.0867.

**dibenzyl 1,1'-(2-ethoxy-2-oxoethane-1,1-diyl)bis(1H-1,2,3-triazole-4-carboxylate) (2b)**

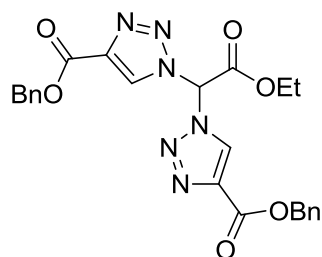

$\text{C}_{24}\text{H}_{22}\text{N}_6\text{O}_6$   
490.46 g/mol

Following the general procedure **A** (300 mg of **1**, 0.1 M, overnight), dibenzyl 1,1'-(2-ethoxy-2-oxoethane-1,1-diyl)bis(1H-1,2,3-triazole-4-carboxylate) was obtained as a white solid (484 mg, 0.99 mmol, 39%) upon purification by column chromatography (PE:EtOAc = 100:0  $\rightarrow$  80:20).

**TLC**:  $R_f = 0.72$  (PE:EtOAc / 80:20, [UV]);  **$^1\text{H-NMR}$**  (400 MHz,  $\text{CDCl}_3$ ):  $\delta$  [ppm] 8.66 (s, 2H), 7.98 (s, 1H), 7.40 (m, 4H), 7.33 (m, 6H), 5.36 (s, 4H), 4.34 (q,  $J = 7.1$  Hz, 2H), 1.22 (t,  $J = 7.1$  Hz, 3H);  **$^{13}\text{C-NMR}$**  (101 MHz,  $\text{CDCl}_3$ ):  $\delta$  [ppm] 161.4, 159.7, 140.7, 136.1, 129.1, 128.72, 128.67, 128.6, 70.6, 67.4, 66.1, 13.8; **HRMS** (ESI): [ $m/z$ ] calculated for [ $\text{C}_{24}\text{H}_{22}\text{N}_6\text{O}_6\text{Na}$ ] 513.1493, found 513.1485.

**ethyl 2,2-bis(4-cyclopropyl-1H-1,2,3-triazol-1-yl)acetate (2c)**

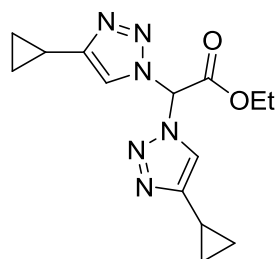

$\text{C}_{14}\text{H}_{18}\text{N}_6\text{O}_2$   
302.33 g/mol

Following the general procedure **A** (500 mg of **1**, 0.1 M, 3 d), ethyl 2,2-bis(4-cyclopropyl-1*H*-1,2,3-triazol-1-yl)acetate was obtained as a white solid (174 mg, 0.58 mmol, 24%) upon purification by column chromatography (PE:EtOAc = 60:40).

**TLC:**  $R_f$  = 0.73 (PE:EtOAc / 80:20, [chlorine chamber / KI-starch stain]); **<sup>1</sup>H-NMR** (600 MHz, CDCl<sub>3</sub>):  $\delta$  [ppm] 7.63 (s, 2H), 7.46 (s, 1H), 4.37 (q,  $J$  = 7.1 Hz, 2H), 1.94 (m, 2H), 1.29 (t,  $J$  = 7.1 Hz, 3H), 0.96 (m, 4H), 0.86 (m, 4H); **<sup>13</sup>C-NMR** (151 MHz, CDCl<sub>3</sub>):  $\delta$  [ppm] 162.4, 151.4, 120.4, 70.7, 64.4, 14.0, 8.0, 6.7; **IR** (ATR): [cm<sup>-1</sup>] 3141, 3108, 3087, 3013, 2960, 1767, 1568, 1433, 1330, 1309, 1233, 1198, 1179, 1146, 1014, 879, 815, 774, 750, 662, 603, 478; **HRMS** (ESI): [m/z] calculated for [C<sub>14</sub>H<sub>18</sub>N<sub>6</sub>O<sub>2</sub>Na] 325.1383, found 325.1380.

#### Ethyl 2,2-bis(4-(4-bromophenyl)-1*H*-1,2,3-triazol-1-yl)acetate (**2d**)

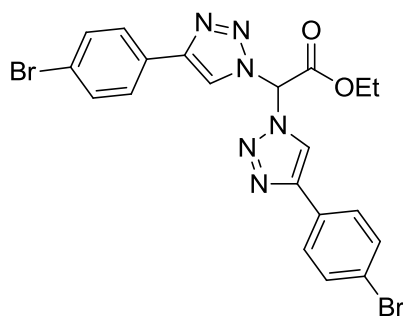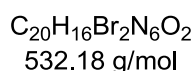

Following the general procedure **A** (200 mg of **1**, 0.1 M, overnight), ethyl 2,2-bis(4-(4-bromophenyl)-1*H*-1,2,3-triazol-1-yl)acetate was obtained as a white solid (383 mg, 0.72 mmol, 76%) upon purification by column chromatography (PE:EtOAc = 70:30).

**TLC:**  $R_f$  = 0.63 (PE:EtOAc / 70:30, [UV]); **<sup>1</sup>H-NMR** (400 MHz, CDCl<sub>3</sub>):  $\delta$  [ppm] 8.25 (s, 2H), 7.72 (m, 1H), 7.70 (m, 4H), 7.56 (m, 4H), 4.45 (q,  $J$  = 7.1 Hz, 2H), 1.34 (t,  $J$  = 7.1 Hz, 3H); **<sup>13</sup>C-NMR** (101 MHz, CDCl<sub>3</sub>):  $\delta$  [ppm] 162.0, 148.0, 132.3, 128.5, 127.6, 123.1, 120.5, 70.9, 64.88, 14.0; **IR** (ATR): [cm<sup>-1</sup>] 3132, 3087, 2965, 2938, 1763, 1605, 1552, 1480, 1438, 1398, 1371, 1317, 1296, 1236, 1202,

1065, 1009, 973, 875, 817, 796, 759, 718, 626, 514; **HRMS** (ESI): [m/z] calculated for [C<sub>20</sub>H<sub>17</sub>N<sub>6</sub>O<sub>2</sub>Br<sub>2</sub>] 530.9774, found 530.9783.

**ethyl 2,2-bis(4-(4-propylphenyl)-1H-1,2,3-triazol-1-yl)acetate (2e)**

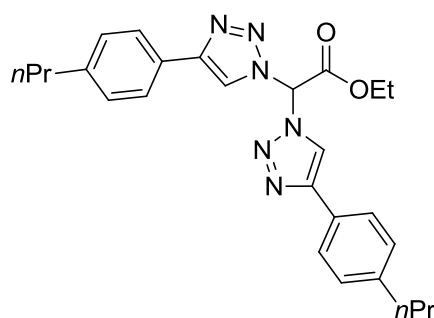

C<sub>26</sub>H<sub>30</sub>N<sub>6</sub>O<sub>2</sub>  
458.55 g/mol

Following the general procedure **A** (150 mg of **1**, 0.1 M, overnight), ethyl 2,2-bis(4-(4-propylphenyl)-1H-1,2,3-triazol-1-yl)acetate was obtained as a white solid (296 mg, 0.65 mmol, 91%) upon purification by column chromatography (PE:EtOAc = 95:5 → 80:20).

**TLC**: R<sub>f</sub> = 0.72 (PE:EtOAc / 80:20, [UV]); **<sup>1</sup>H-NMR** (600 MHz, CDCl<sub>3</sub>): δ [ppm] 8.19 (s, 2H), 7.74 (d, *J* = 8.1 Hz, 4H), 7.68 (s, 1H), 7.24 (d, *J* = 8.1 Hz, 4H), 4.43 (q, *J* = 7.1 Hz, 2H), 2.61 (t, *J* = 7.6 Hz, 4H), 1.66 (m, 4H), 1.33 (t, *J* = 7.1 Hz, 3H), 0.94 (t, *J* = 7.3 Hz, 6H); **<sup>13</sup>C-NMR** (151 MHz, CDCl<sub>3</sub>): δ [ppm] 162.2, 149.1, 143.7, 129.2, 127.0, 126.0, 119.9, 71.0, 64.6, 38.0, 24.5, 14.03, 13.9; **IR** (ATR): [cm<sup>-1</sup>] 3113, 2956, 2930, 2869, 1762, 1497, 1437, 1414, 1368, 1352, 1284, 1238, 1170, 1074, 1015, 879, 818, 797, 771, 592, 529; **HRMS** (ESI): [m/z] calculated for [C<sub>26</sub>H<sub>30</sub>N<sub>6</sub>O<sub>2</sub>Na] 481.2322, found 481.2322.



**ethyl 2,2-bis(4-phenyl-1H-1,2,3-triazol-1-yl)acetate (2f)**

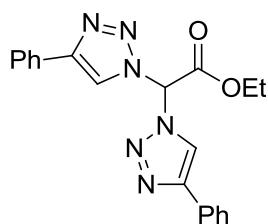

$C_{20}H_{18}N_6O_2$   
374.39 g/mol

Following the general procedure **A** (2.0 g of **1**, 0.1 M, overnight), ethyl 2,2-bis(4-phenyl-1H-1,2,3-triazol-1-yl)acetate was obtained as a white solid (2.620 g, 7.00 mmol, 74%) upon purification by column chromatography (PE:EtOAc = 90:10 → 70:30).

**TLC:**  $R_f = 0.70$  (PE:EtOAc / 70:30, [UV]);  **$^1H$ -NMR** (600 MHz,  $CDCl_3$ ):  $\delta$  [ppm] 8.25 (s, 2H), 7.84 (d,  $J = 7.2$  Hz, 4H), 7.71 (s, 1H), 7.43 (t,  $J = 7.6$  Hz, 4H), 7.36 (t,  $J = 7.4$  Hz, 2H), 4.45 (q,  $J = 7.1$  Hz, 2H), 1.34 (t,  $J = 7.1$  Hz, 3H);  **$^{13}C$ -NMR** (151 MHz,  $CDCl_3$ ):  $\delta$  [ppm] 162.2, 149.0, 129.6, 129.1, 129.0, 126.1, 120.3, 71.0, 64.7, 14.0; **IR** (ATR): [ $cm^{-1}$ ] 3130, 3102, 2983, 2961, 1760, 1483, 1457, 1428, 1356, 1282, 1254, 1180, 1072, 1019, 820, 763, 693, 589, 510; **HRMS** (ESI): [m/z] calculated for [ $C_{20}H_{18}N_6O_2Na$ ] 397.1383, found 397.1384.

**dimethyl 1,1'-(azidomethylene)bis(1H-1,2,3-triazole-4-carboxylate) (3a)**

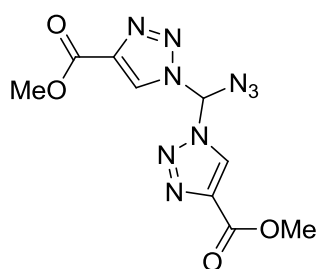

$C_9H_9N_9O_4$   
307.22 g/mol

Following the general procedure **B** (1.518 g of **2a**, 0.1 M, overnight), dimethyl 1,1'-(azidomethylene)bis(1H-1,2,3-triazole-4-carboxylate) was obtained as a white solid (870 mg, 2.83 mmol, 63%) upon purification by column chromatography (PE:EtOAc = 60:40 → 50:50).

**TLC:**  $R_f = 0.22$  (PE:EtOAc / 60:40, [CAM]);  **$^1\text{H-NMR}$**  (400 MHz,  $\text{CDCl}_3$ ):  $\delta$  [ppm] 8.77 (s, 1H), 8.64 (s, 2H), 3.94 (s, 6H);  **$^{13}\text{C-NMR}$**  (101 MHz,  $\text{CDCl}_3$ ):  $\delta$  [ppm] 160.3, 140.9, 127.0, 80.7, 52.7;  **$^{15}\text{N-NMR}$**  (61 MHz,  $d_6$ -DMSO):  $\delta$  [ppm] -17.6, -20.0, -127.2 (d,  $J = 4.4$  Hz), 143.0, (d,  $J = 3.6$  Hz), 152.8, 293.6; **IR** (ATR): [ $\text{cm}^{-1}$ ] 3147, 3112, 2966, 2264, 2142, 1745, 1718, 1531, 1435, 1371, 1326, 1259, 1218, 1175, 1163, 1117, 1100, 1036, 1008, 989, 953, 871, 846, 823, 779, 692, 650, 636, 616, 550, 530, 498, 456, 432, 413.

**dibenzyl 1,1'-(azidomethylene)bis(1H-1,2,3-triazole-4-carboxylate) (3b)**

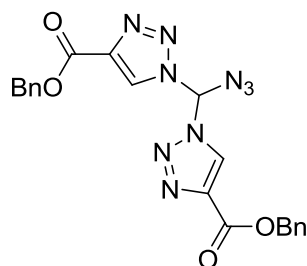

$\text{C}_{21}\text{H}_{17}\text{N}_9\text{O}_4$   
459.41 g/mol

Following the general procedure **B** (100 mg of **2b**, 0.1 M, 2.0 eq. IBX- $\text{SO}_3\text{K}$ , overnight), dibenzyl 1,1'-(azidomethylene)bis(1H-1,2,3-triazole-4-carboxylate) was obtained as a white solid (174 mg, 0.58 mmol, 24%) upon purification by column chromatography (PE:EtOAc = 90:10  $\rightarrow$  80:20).

**TLC:**  $R_f = 0.78$  (PE:EtOAc / 70:30, [UV]);  **$^1\text{H-NMR}$**  (400 MHz,  $\text{CDCl}_3$ ):  $\delta$  [ppm] 8.56 (s, 1H), 8.53 (s, 2H), 7.42 (m, 4H), 7.35 (m, 6H), 5.38 (s, 4H);  **$^{13}\text{C-NMR}$**  (101 MHz,  $\text{CDCl}_3$ ):  $\delta$  [ppm] 159.6, 141.0, 135.1, 128.82, 128.80, 126.8, 80.7, 67.6; **IR** (ATR): [ $\text{cm}^{-1}$ ] 3135, 2963, 2133, 1725, 1539, 1455, 1389, 1356, 1212, 1168, 1028, 845, 810, 772, 737, 696, 588, 529.

**1,1'-(azidomethylene)bis(4-cyclopropyl-1*H*-1,2,3-triazole) (3c)**

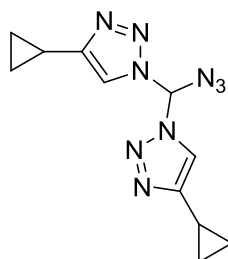

C<sub>11</sub>H<sub>13</sub>N<sub>9</sub>  
271.28 g/mol

Following the general procedure **C** (26 mg of **2c**, 0.01 M, overnight), 1,1'-(azidomethylene)bis(4-cyclopropyl-1*H*-1,2,3-triazole) was obtained as a white solid (8 mg, 0.02 mmol, 26%) upon purification by column chromatography (PE:EtOAc = 100:0 → 80:20).

**TLC:** R<sub>f</sub> = 0.75 (PE:EtOAc / 80:20, [chlorine chamber / KI-starch stain]); **<sup>1</sup>H-NMR** (400 MHz, CDCl<sub>3</sub>): δ [ppm] 8.06 (s, 1H), 7.56 (s, 2H), 1.95 (m, 2H), 0.99 (m, 4H), 0.89 (m, 4H); **<sup>13</sup>C-NMR** (101 MHz, CDCl<sub>3</sub>): δ [ppm] 151.7, 118.3, 80.4, 8.1, 6.8; **IR** (ATR): [cm<sup>-1</sup>] 3099, 3072, 2962, 2116, 1569, 1457, 1318, 1218, 1142, 1034, 934, 798, 704, 551.

**1,1'-(azidomethylene)bis(4-(4-bromophenyl)-1*H*-1,2,3-triazole) (3d)**

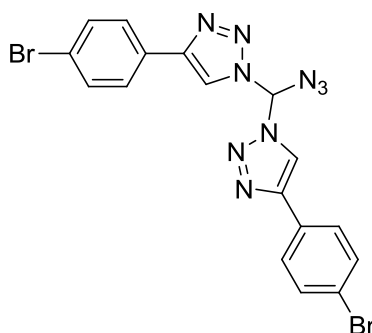

C<sub>17</sub>H<sub>11</sub>Br<sub>2</sub>N<sub>9</sub>  
501.13 g/mol

Following the general procedure **C** (50 mg of **2d**, 0.01 M, overnight), 1,1'-(azidomethylene)bis(4-(4-bromophenyl)-1*H*-1,2,3-triazole) was obtained as a white solid (21 mg, 0.05 mmol, 19%) upon purification by column chromatography (PE:EtOAc = 90:10 → 70:30).

**TLC:**  $R_f = 0.59$  (PE:EtOAc / 70:30, [UV]);  **$^1\text{H-NMR}$**  (400 MHz,  $\text{CDCl}_3$ ):  $\delta$  [ppm] 8.28 (s, 1H), 8.13 (s, 2H), 7.72 (m, 4H), 7.58 (m, 4H);  **$^{13}\text{C-NMR}$**  (101 MHz,  $\text{CDCl}_3$ ):  $\delta$  [ppm] 148.3, 132.4, 128.2, 127.7, 123.4, 118.1, 80.8; **IR** (ATR):  $[\text{cm}^{-1}]$  2983, 2113, 1744, 1359, 1223, 1068, 1008, 942, 853, 762, 582, 543, 459.

**1,1'-(azidomethylene)bis(4-(4-propylphenyl)-1H-1,2,3-triazole) (3e)**

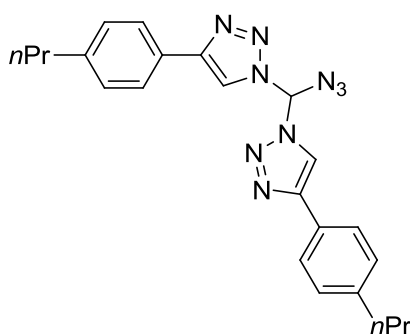

$\text{C}_{23}\text{H}_{25}\text{N}_9$   
427.50 g/mol

Following the general procedure **C** (50 mg of **2e**, 0.1 M, overnight), 1,1'-(azidomethylene)bis(4-(4-propylphenyl)-1H-1,2,3-triazole) was obtained as a white solid (17 mg, 0.04 mmol, 36%) upon purification by column chromatography (PE:EtOAc = 80:20  $\rightarrow$  70:30).

**TLC:**  $R_f = 0.74$  (PE:EtOAc / 70:30, [UV]);  **$^1\text{H-NMR}$**  (400 MHz,  $\text{CDCl}_3$ ):  $\delta$  [ppm] 8.27 (s, 1H), 8.07 (s, 2H), 7.74 (m, 4H), 7.25 (m, 4H), 2.62 (m, 4H), 1.66 (m, 4H), 0.95 (t, 7.3 Hz, 6H);  **$^{13}\text{C-NMR}$**  (101 MHz,  $\text{CDCl}_3$ ):  $\delta$  [ppm] 149.4, 144.0, 129.3, 126.7, 126.1, 117.6, 80.8, 38.0, 24.5, 13.9; **IR** (ATR):  $[\text{cm}^{-1}]$  3130, 2956, 2930, 2869, 2135, 1498, 1434, 1411, 1361, 1259, 1160, 1074, 1014, 936, 801, 781, 526.

**1,1'-(azidomethylene)bis(4-phenyl-1*H*-1,2,3-triazole) (3f)**

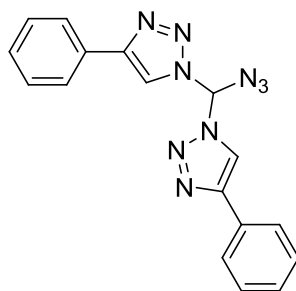

C<sub>17</sub>H<sub>13</sub>N<sub>9</sub>  
343.34 g/mol

Following the general procedure **C** (50 mg of **2f**, 0.01 M, overnight), 1,1'-(azidomethylene)bis(4-phenyl-1*H*-1,2,3-triazole) was obtained as a white solid (16 mg, 0.05 mmol, 35%) upon purification by column chromatography (PE:EtOAc = 80:20 → 70:30).

**TLC:** R<sub>f</sub> = 0.68 (PE:EtOAc / 70:30, [UV]); **<sup>1</sup>H-NMR** (400 MHz, CDCl<sub>3</sub>): δ [ppm] 8.30 (s, 1H), 8.13 (s, 2H), 7.84 (m, 4H), 7.45 (m, 4 H), 7.38 (m, 2 H); **<sup>13</sup>C-NMR** (101 MHz, CDCl<sub>3</sub>): δ [ppm] 149.1, 129.1, 129.08, 129.03, 126.0, 117.9, 80.7; **IR** (ATR): [cm<sup>-1</sup>] 3135, 3105, 3082, 3032, 2984, 2128, 1483, 1423, 1363, 1265, 1161, 1074, 1011, 940, 760, 690.

**trimethyl 1,1',1''-methanetriyltris(1*H*-1,2,3-triazole-4-carboxylate) (4a)**

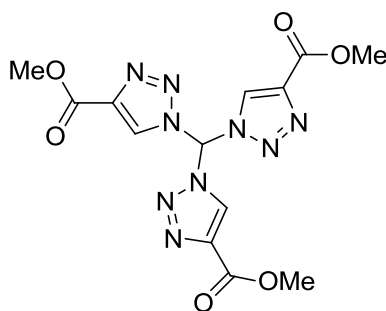

C<sub>13</sub>H<sub>13</sub>N<sub>9</sub>O<sub>6</sub>  
391.29 g/mol

Following the general procedure **D** (200 mg of **3a**, 0.01 M, overnight), trimethyl 1,1',1''-methanetriyltris(1*H*-1,2,3-triazole-4-carboxylate) was obtained as a white solid (202 mg, 0.52 mmol, 79%) upon precipitation with diethyl ether.

**<sup>1</sup>H-NMR** (400 MHz, d<sub>6</sub>-DMSO): δ [ppm] 10.34 (s, 1H), 9.33 (s, 3H), 3.87 (s, 9H); **<sup>13</sup>C-NMR** (101 MHz, d<sub>6</sub>-DMSO): δ [ppm] 159.8, 139.8, 130.0, 77.7, 52.2; **<sup>15</sup>N-NMR** (61 MHz, d<sub>6</sub>-DMSO): δ [ppm] -16.4, -19.3, -134.5 (virt. d, *J* = 4.6 Hz); **IR** (ATR): [cm<sup>-1</sup>] 3169, 3129, 2995, 2957, 1724, 1547, 1435, 1366, 1338, 1275, 1261, 1246, 1205, 1180, 1163, 1147, 1118, 1028, 990, 935, 876, 850, 839, 799, 771, 701, 637, 533, 501, 462, 437; **HRMS** (ESI): [m/z] calculated for [C<sub>13</sub>H<sub>13</sub>N<sub>9</sub>O<sub>6</sub>Na] 414.0881, found 414.0882.

**tribenzyl 1,1',1''-methanetriyltris(1*H*-1,2,3-triazole-4-carboxylate) (4b)**

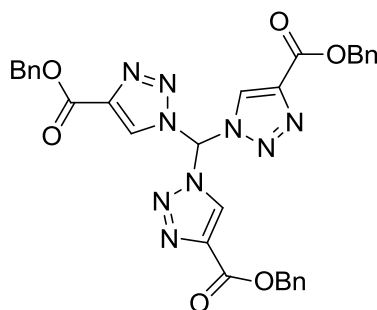

C<sub>31</sub>H<sub>25</sub>N<sub>9</sub>O<sub>6</sub>  
619.58 g/mol

Following the general procedure **D** (36 mg of **3b**, 0.01M, overnight), tribenzyl 1,1',1''-methanetriyltris(1*H*-1,2,3-triazole-4-carboxylate) was obtained as a white solid (29 mg, 0.05 mmol, 60%) upon precipitation with diethyl ether.

Single crystals suitable for crystal structure analysis were obtained by slow evaporation of a solution in deuterated chloroform.

**<sup>1</sup>H-NMR** (400 MHz, CDCl<sub>3</sub>): δ [ppm] 9.62 (s, 1H), 8.66 (s, 3H), 7.37 (m, 15H), 5.37 (s, 6H); **<sup>13</sup>C-NMR** (101 MHz, CDCl<sub>3</sub>): δ [ppm] 159.2, 141.6, 134.9, 128.94, 128.94, 128.90, 128.88, 128.0, 78.2, 67.8; **IR** (ATR): [cm<sup>-1</sup>] 3134, 3111, 3062, 3034, 2955, 2914, 1722, 1532, 1496, 1438, 1396, 1365, 1285, 1231, 1196, 1153, 1131, 1026, 991, 908, 833, 820, 776, 749, 733, 693, 595, 521; **HRMS** (ESI): [m/z] calculated for [C<sub>31</sub>H<sub>25</sub>N<sub>9</sub>O<sub>6</sub>Na] 642.1820, found 642.1821.

**tris(4-cyclopropyl-1H-1,2,3-triazol-1-yl)methane (4c)**

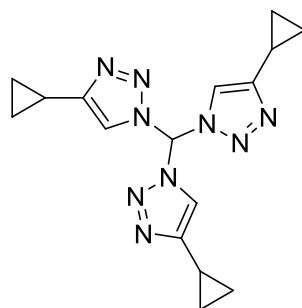

$C_{16}H_{19}N_9$   
337.38 g/mol

Following the general procedure **D** (7 mg of **3c**, 0.01M, overnight), tris(4-cyclopropyl-1H-1,2,3-triazol-1-yl)methane was obtained as a white solid (6 mg, 0.02 mmol, 69%) upon precipitation with diethyl ether.

$^1\text{H-NMR}$  (400 MHz,  $\text{CDCl}_3$ ):  $\delta$  [ppm] 9.17 (s, 1H), 7.78 (s, 3H), 1.95 (m, 3H), 0.95 (m, 12H);  $^{13}\text{C-NMR}$  (101 MHz,  $\text{CDCl}_3$ ):  $\delta$  [ppm] 151.8, 119.7, 78.3, 8.2, 6.7; **IR** (ATR): [ $\text{cm}^{-1}$ ] 3143, 3093, 2990, 1567, 1437, 1335, 1235, 1153, 1108, 1026, 814; **HRMS** (ESI): [m/z] calculated for [ $\text{C}_{16}\text{H}_{19}\text{N}_9\text{Na}$ ] 360.1656, found 360.1657.

**tris(4-(4-propylphenyl)-1H-1,2,3-triazol-1-yl)methane (4d)**

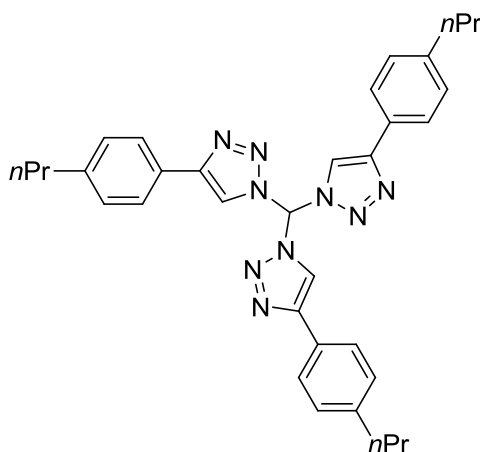

$C_{34}H_{37}N_9$   
571.71 g/mol

Following the general procedure **D** (6 mg of **3e**, 0.01M, overnight), tris(4-(4-propylphenyl)-1*H*-1,2,3-triazol-1-yl)methane was obtained as a white solid (6 mg, 0.01 mmol, 75%) upon precipitation with diethyl ether.

**<sup>1</sup>H-NMR** (400 MHz, CDCl<sub>3</sub>): δ [ppm] 9.54 (s, 1H), 8.38 (s, 3H), 7.75 (m, 6H), 7.25 (m, 6H), 2.62 (m, 6H), 1.66 (m, 6H), 0.91 (t, *J* = 7.3 Hz, 9H); **<sup>13</sup>C-NMR** (101 MHz, CDCl<sub>3</sub>): δ [ppm] 149.6, 144.2, 129.3, 126.5, 126.2, 119.1, 78.8, 38.0, 24.5, 13.9; **IR** (ATR): [cm<sup>-1</sup>] 3145, 3116, 2958, 2928, 2857, 1499, 1439, 1414, 1365, 1336, 1234, 1176, 1074, 1013, 800, 54; **HRMS** (ESI): [m/z] calculated for [C<sub>34</sub>H<sub>37</sub>N<sub>9</sub>Na] 594.3064, found 594.3059.

**tris(4-phenyl-1*H*-1,2,3-triazol-1-yl)methane (4e)**

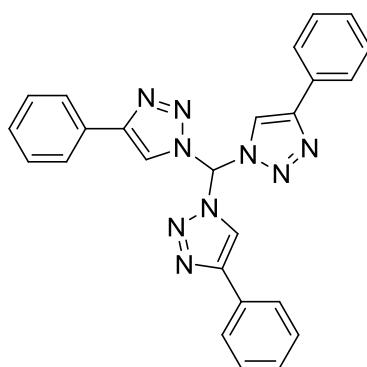

C<sub>25</sub>H<sub>19</sub>N<sub>9</sub>  
445.47 g/mol

Following the general procedure **D** (9 mg of **3f**, 0.01M, overnight), tris(4-phenyl-1*H*-1,2,3-triazol-1-yl)methane was obtained as a white solid (9 mg, 0.02 mmol, 77%) upon precipitation with diethyl ether.

**<sup>1</sup>H-NMR** (400 MHz, CDCl<sub>3</sub>): δ [ppm] 9.52 (s, 1H), 8.41 (s, 3H), 7.85 (m, 6H), 7.46 (m, 6H), 7.39 (m, 3H); **<sup>13</sup>C-NMR** (101 MHz, CDCl<sub>3</sub>): δ [ppm] 3134, 2953, 1483, 1456, 1418, 1374, 1358, 1237, 1176, 1072, 1013, 843, 800, 758, 691, 511, 454; **IR** (ATR): [cm<sup>-1</sup>] 3134, 2953, 1483, 1456, 1418, 1374, 1358, 1237, 1176, 1072, 1013, 843, 800, 758, 691, 511, 454; **HRMS** (ESI): [m/z] calculated for [C<sub>25</sub>H<sub>19</sub>N<sub>9</sub>Na] 468.1656, found 468.1648.



**dimethyl 1,1'-((4-((benzyloxy)carbonyl)-1*H*-1,2,3-triazol-1-yl)methylene)bis(1*H*-1,2,3-triazole-4-carboxylate) (4f)**

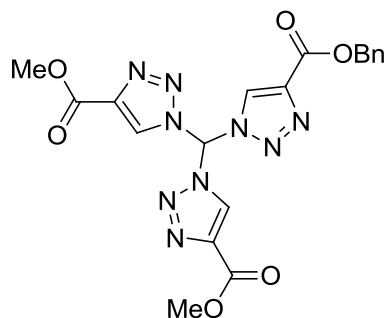

$C_{19}H_{17}N_9O_6$   
467.39 g/mol

Following the general procedure **D** (50 mg of **3a**, 0.01M, overnight), dimethyl 1,1'-((4-((benzyloxy)carbonyl)-1*H*-1,2,3-triazol-1-yl)methylene)bis(1*H*-1,2,3-triazole-4-carboxylate) was obtained as a white solid (49 mg, 0.10 mmol, 64%) upon precipitation with diethyl ether.

**<sup>1</sup>H-NMR** (400 MHz, *d*<sub>6</sub>-DMSO): δ [ppm] 10.32 (s, 1H), 9.38 (s, 1H), 9.33 (s, 2H), 7.39 (m, 5H), 5.38 (s, 2H), 3.87 (s, 6H); **<sup>13</sup>C-NMR** (101 MHz, *d*<sub>6</sub>-DMSO): δ [ppm] 159.8, 159.3, 139.8, 139.7, 136.5, 130.3, 130.1, 128.5, 128.30, 128.27, 77.7, 66.4, 52.2; **IR** (ATR): [cm<sup>-1</sup>] 3095, 3050, 2994, 2951, 1727, 1536, 1433, 1373, 1275, 1212, 1128, 1108, 1029, 813, 779, 750, 690, 596, 520, 415; **HRMS** (ESI): [m/z] calculated for [C<sub>19</sub>H<sub>17</sub>N<sub>9</sub>O<sub>6</sub>Na] 490.1194, found 490.1195.

**dimethyl 1,1'-((4-cyclopropyl-1*H*-1,2,3-triazol-1-yl)methylene)bis(1*H*-1,2,3-triazole-4-carboxylate) (4g)**

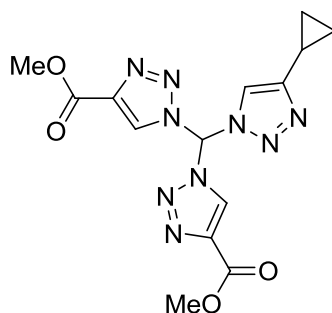

$C_{14}H_{15}N_9O_4$   
373.32 g/mol

Following the general procedure **D** (50 mg of **3a**, 0.01M, overnight), dimethyl 1,1'-((4-cyclopropyl-1*H*-1,2,3-triazol-1-yl)methylene)bis(1*H*-1,2,3-triazole-4-carboxylate) was obtained as a white solid (27 mg, 0.07 mmol, 64%) upon precipitation with diethyl ether.

<sup>1</sup>**H-NMR** (400 MHz, d<sub>6</sub>-DMSO): δ [ppm] 10.26 (s, 1H), 9.27 (s, 2H), 8.40 (s, 1H), 3.87 (s, 6H), 2.01 (m, 1H), 0.94 (m, 2H), 0.78 (m, 2H); <sup>13</sup>**C-NMR** (101 MHz, d<sub>6</sub>-DMSO): δ [ppm] 159.8, 150.7, 139.7, 129.7, 121.2, 77.4, 52.2, 7.7, 6.3; **IR** (ATR): [cm<sup>-1</sup>] 3123, 2995, 2954, 1735, 1626, 1550, 1432, 1376, 1355, 1337, 1267, 1244, 1227, 1215, 1187, 991, 842, 831, 776, 694; **HRMS** (ESI): [m/z] calculated for [C<sub>14</sub>H<sub>15</sub>N<sub>9</sub>O<sub>4</sub>Na] 396.1139, found 396.1124.

**dimethyl 1,1'-((4-phenyl-1*H*-1,2,3-triazol-1-yl)methylene)bis(1*H*-1,2,3-triazole-4-carboxylate)**  
**(4h)**

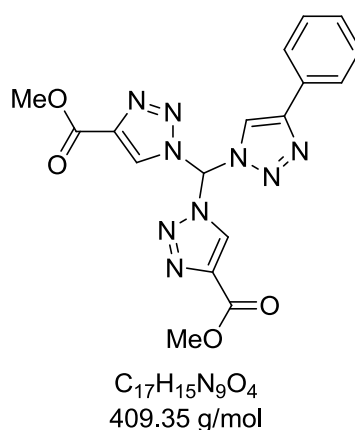

Following the general procedure **D** (300 mg of **3a**, 0.01M, overnight), dimethyl 1,1'-((4-phenyl-1*H*-1,2,3-triazol-1-yl)methylene)bis(1*H*-1,2,3-triazole-4-carboxylate) was obtained as a white solid (327 mg, 0.80 mmol, 82%) upon precipitation with diethyl ether.

<sup>1</sup>**H-NMR** (600 MHz, d<sub>6</sub>-DMSO): δ [ppm] 10.39 (s, 1H), 9.36 (s, 2H), 9.10 (s, 1H), 7.92 (m, 2H), 7.48 (m, 2H), 7.40 (m, 1H), 3.88 (s, 6H); <sup>13</sup>**C-NMR** (151 MHz, d<sub>6</sub>-DMSO): δ [ppm] 159.8, 147.7, 139.7, 129.8, 129.2, 128.9, 128.7, 125.5, 121.6, 77.7, 52.1; **IR** (ATR): [cm<sup>-1</sup>] 3129, 3087, 2996, 2953, 1756, 1553, 1428, 1210, 1185, 1029, 988, 765, 694, 624, 468, 420; **HRMS** (ESI): [m/z] calculated for [C<sub>17</sub>H<sub>15</sub>N<sub>9</sub>O<sub>4</sub>Na] 432.1139, found 432.1139.

**hexamethyl 1,1',1'',1''',1''''',1''''''-((4,4',4''-(nitrilotris(methylene))tris(1*H*-1,2,3-triazole-4,1-diyl))tris(methanetriyl))hexakis(1*H*-1,2,3-triazole-4-carboxylate) (5)**

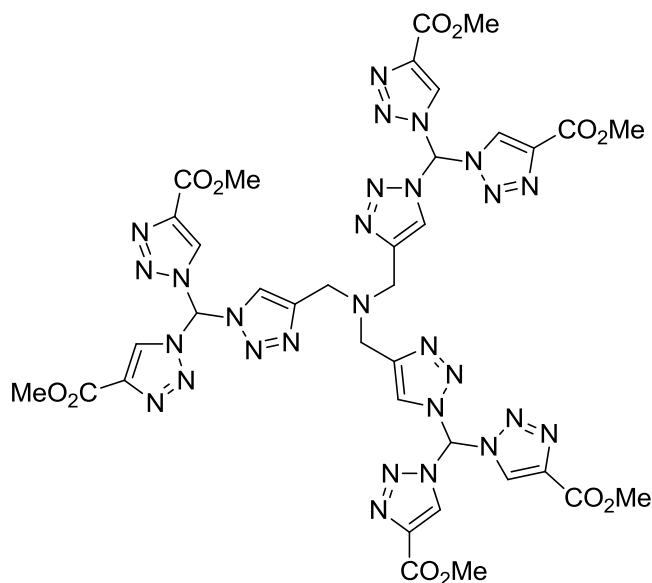

$C_{36}H_{36}N_{28}O_{12}$   
1052.85 g/mol

**3a** (170 mg, 0.55 mmol) was dissolved in 40 ml *t*BuOH and 10 ml Water. Tripropargyl amine (16  $\mu$ L, 0.11 mmol, 0.20 eq.), copper(II)sulfate pentahydrate (55 mg, 0.22 mmol, 40 mol%) and sodium ascorbate (92 mg, 0.46 mmol, 84 mol%) were added and the solution stirred for 16 h at room temperature. The resulting suspension was quenched with a saturated, aqueous solution of EDTA disodium salt and extracted with ethyl acetate (4x). The combined organic phases were washed with brine and **NOT** dried over sodium sulfate. The solvent was removed in vacuo and to the crude product was added a small portion of ethyl acetate. The suspension was filtered off and washed with another portion of ethyl acetate, hot aqueous EDTA disodium salt, water and diethyl ether. The product was obtained as a white solid (90 mg, 0.09 mmol, 81%) upon drying under high vacuum.

**<sup>1</sup>H-NMR** (600 MHz, *d*<sub>6</sub>-DMSO):  $\delta$  [ppm] 10.48 (s, 3H), 9.32 (s, 6H), 8.67 (s, 3H), 3.86 (s, 18 H), 3.75 (s, 6H); **<sup>13</sup>C-NMR** (151 MHz, *d*<sub>6</sub>-DMSO):  $\delta$  [ppm] 159.8, 144.6, 139.5, 129.8, 125.0, 77.2, 52.1, 46.5; **IR** (ATR): [cm<sup>-1</sup>] 3133, 3003, 2955, 1736, 1552, 1436, 1372, 1344, 1261, 1223, 1182, 1123, 1091, 1032, 993, 942, 839, 814, 795, 774, 692, 534, 517, 481, 466, 438; **HRMS** (ESI): [m/z] calculated for [C<sub>36</sub>H<sub>37</sub>N<sub>28</sub>O<sub>12</sub>] 1053.3140, found 1053.3140.

**rac ethyl 2-azido-2-(4-tosyl-1H-1,2,3-triazol-1-yl)acetate (7)**

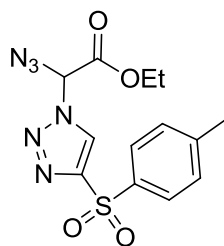

C<sub>13</sub>H<sub>14</sub>N<sub>6</sub>O<sub>4</sub>S  
350.35 g/mol

**1** (500 mg, 2.36 mmol) was dissolved in 50 ml acetonitrile and tosyl acetylene (467 mg, 2.59 mmol, 1.1 eq.) was added to the solution and the reaction mixture stirred at 60 °C for two days. The organic phase was evaporated *in vacuo* and the desired product obtained upon purification with column chromatography (PE:EtOAc = 80:20 → 60:40) as a viscous, colorless oil (268 mg, 0.76 mmol, 32%).

**<sup>1</sup>H-NMR** (400 MHz, CDCl<sub>3</sub>): δ [ppm] 8.41 (s, 1H), 7.97 (m, 2H), 7.35 (m, 2H), 6.34 (s, 1H), 4.36 (m, 2H), 3.58 (s, 1H), 2.43 (s, 3H), 1.33 (t, *J* = 7.1 Hz, 3H); **<sup>13</sup>C-NMR** (101 MHz, CDCl<sub>3</sub>): δ [ppm] 163.2, 150.5, 145.6, 136.8, 130.2, 128.5, 125.5, 72.4, 64.6, 21.8, 14.1; **IR** (ATR): [cm<sup>-1</sup>] 3134, 2983, 2939, 2121, 1755, 1496 1446, 1305, 1105, 1085, 1016, 813, 645, 600, 570, 535, 494.

**rac methyl 1-(2-ethoxy-2-oxo-1-(4-tosyl-1H-1,2,3-triazol-1-yl)ethyl)-1H-1,2,3-triazole-4-carboxylate (8)**

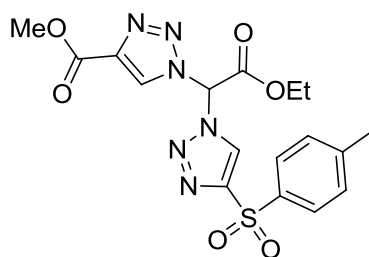

C<sub>17</sub>H<sub>18</sub>N<sub>6</sub>O<sub>6</sub>S  
434.42 g/mol

**7** (132 mg, 0.38 mmol) was dissolved in 4 ml <sup>t</sup>BuOH, 1 ml Water and 500 μL acetonitrile. Methyl propiolate (37 μL, 0.41 mmol, 1.1 eq.), TBTA (2.6 mg, 4.97 μmol, 1 mol%), copper(II)sulfate pentahydrate (19 mg, 0.08 mmol, 20 mol%) and sodium ascorbate (31 mg, 0.16 mmol, 42 mol%) were

added to the solution and the reaction mixture stirred 16 h at room temperature. The reaction was quenched with a saturated solution of EDTA disodium salt in water and extracted with ethyl acetate (3x). The combined organic phases were washed with brine and dried over sodium sulfate. The organic phase was evaporated *in vacuo* and the product obtained upon purification by column chromatography (PE:EtOAc = 70:30 → 50:50) as a white solid (38 mg, 0.09 mmol, 23%).

**<sup>1</sup>H-NMR** (400 MHz, CDCl<sub>3</sub>): δ [ppm] 8.70 (s, 1H), 8.62 (s, 1H), 7.94 (m, 2H), 7.89 (s, 1H), 7.33 (m, 2H), 4.37 (m, 2H), 3.93 (s, 3H), 2.40 (s, 3H), 1.25 (m, 3H); **<sup>13</sup>C-NMR** (101 MHz, CDCl<sub>3</sub>): δ [ppm] 161.1, 160.3, 150.6, 145.8, 140.9, 136.5, 130.3, 130.2, 129.0, 128.5, 128.2, 127.3, 70.7, 66.4, 52.6, 21.8, 13.9; **IR** (ATR): [cm<sup>-1</sup>] 3157, 2970, 2927, 1726, 1595, 1556, 1434, 1236, 1119, 1025, 842, 766, 672, 603, 535, 492; **HRMS** (ESI): [m/z] calculated for [C<sub>17</sub>H<sub>18</sub>N<sub>6</sub>O<sub>6</sub>SNa] 457.0901, found 457.0901.

***rac* methyl 1-(azido(4-tosyl-1*H*-1,2,3-triazol-1-yl)methyl)-1*H*-1,2,3-triazole-4-carboxylate (9)**

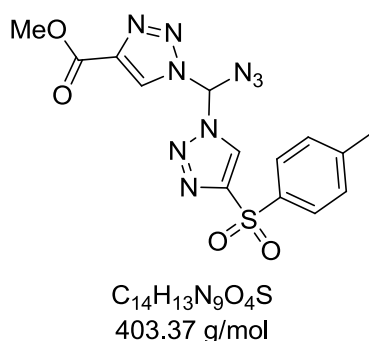

**8** (38 mg, 0.09 mmol) was dissolved in 3 ml DMSO and 1 ml Water. Sodium azide (57 mg, 0.87 mmol, 10.0 eq.), sodium iodide (3 mg, 0.02 mmol, 20 mol%) and IBX-SO<sub>3</sub>K were added to the solution and the resulting yellow reaction mixture was stirred for 16 h at room temperature. The reaction was quenched by addition of a saturated, aqueous solution of sodium thiosulfate and extracted with ethyl acetate (3x). The combined organic phases were washed with brine and dried over sodium sulfate. The solvent was evaporated *in vacuo* and the crude product subjected to column chromatography (PE:EtOAc = 70:30 → 50:50) to obtain the product as a white solid (8 mg, 0.02 mmol, 23%).

**<sup>1</sup>H-NMR** (400 MHz, d<sub>6</sub>-DMSO): δ [ppm] 9.48 (s, 1H), 9.30 (s, 1H), 9.08 (s, 1H), 7.89 (m, 2H), 7.49 (m, 2H), 3.86 (s, 3H), 2.40 (s, 3H); **<sup>13</sup>C-NMR** (101 MHz, d<sub>6</sub>-DMSO): δ [ppm] 160.0, 148.5, 145.4, 139.3, 136.6, 130.3, 128.9, 128.2, 127.6, 80.5, 52.1, 21.1; **IR** (ATR): [cm<sup>-1</sup>] 3124, 2956, 2924, 2852, 2127, 1739 1595, 1557, 1498, 1369, 1328, 1218, 1185, 1150, 1122, 1102, 771, 673, 602, 492, 446.

**rac methyl 1-((4-phenyl-1H-1,2,3-triazol-1-yl)(4-tosyl-1H-1,2,3-triazol-1-yl)methyl)-1H-1,2,3-triazole-4-carboxylate (6)**

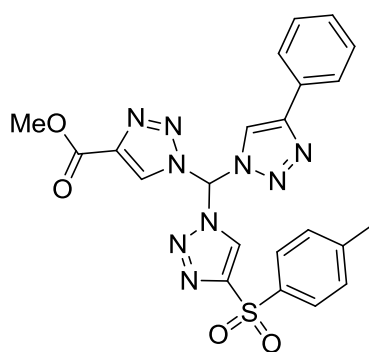

C<sub>22</sub>H<sub>19</sub>N<sub>9</sub>O<sub>4</sub>S  
505.50 g/mol

**9** (7 mg, 0.02 mmol) was dissolved in 1 ml <sup>t</sup>BuOH and 300 μL Water. Phenylacetylene (8 μL, 0.07 mmol, 4.0 eq.), copper(II)sulfate pentahydrate (2 mg, 0.01 mmol, 40 mol%) and sodium ascorbate (3 mg, 0.01 mmol, 84 mol%) were added and the solution stirred for 16 h at room temperature. The reaction was quenched with addition of a saturated, aqueous solution of EDTA disodium salt and extracted with ethyl acetate (3x). The combined organic phases were washed with brine and dried over sodium sulfate. The solvent was removed *in vacuo* and the crude product subjected to column chromatography (PE:EtOAc = 60:30 → 40:60) to obtain the product as a white solid (4 mg, 0.01 mmol, 46%).

**<sup>1</sup>H-NMR** (400 MHz, d<sub>6</sub>-DMSO): δ [ppm] 10.32 (s, 1H), 9.51 (s, 1H), 9.37 (s, 1H), 9.12 (s, 1H), 7.90 (m, 4H), 7.48 (m, 4H), 7.40 (m, 1H), 3.87 (s, 3H), 2.40 (s, 3H); **<sup>13</sup>C-NMR** (101 MHz, d<sub>6</sub>-DMSO): δ [ppm] 159.8, 148.9, 147.7, 145.5, 139.7, 136.4, 130.3, 130.1, 129.2, 129.0, 128.7, 127.7, 125.6, 121.8, 77.8, 52.2, 21.1; **IR** (ATR): [cm<sup>-1</sup>] 3140, 2974, 2955, 2924, 2852, 1743, 1595, 1558, 1507, 1487,

1424, 1324, 1269, 1212, 1154, 1114, 1085, 1026, 1016, 978, 836, 798, 767, 705, 675, 640, 605, 533;

**HRMS** (ESI): [m/z] calculated for [C<sub>22</sub>H<sub>19</sub>N<sub>9</sub>O<sub>4</sub>SNa] 528.1173, found 528.1163.

Spectra ( $^1\text{H}$ -NMR,  $^{13}\text{C}$ -NMR,  $^{15}\text{N}$ -NMR,  $^1\text{H}$ - $^{15}\text{N}$  HMBC, IR)

ethyl 2,2-diazido-3-oxobutanoate (1)

$^1\text{H}$  NMR(400MHz CDCl<sub>3</sub>)

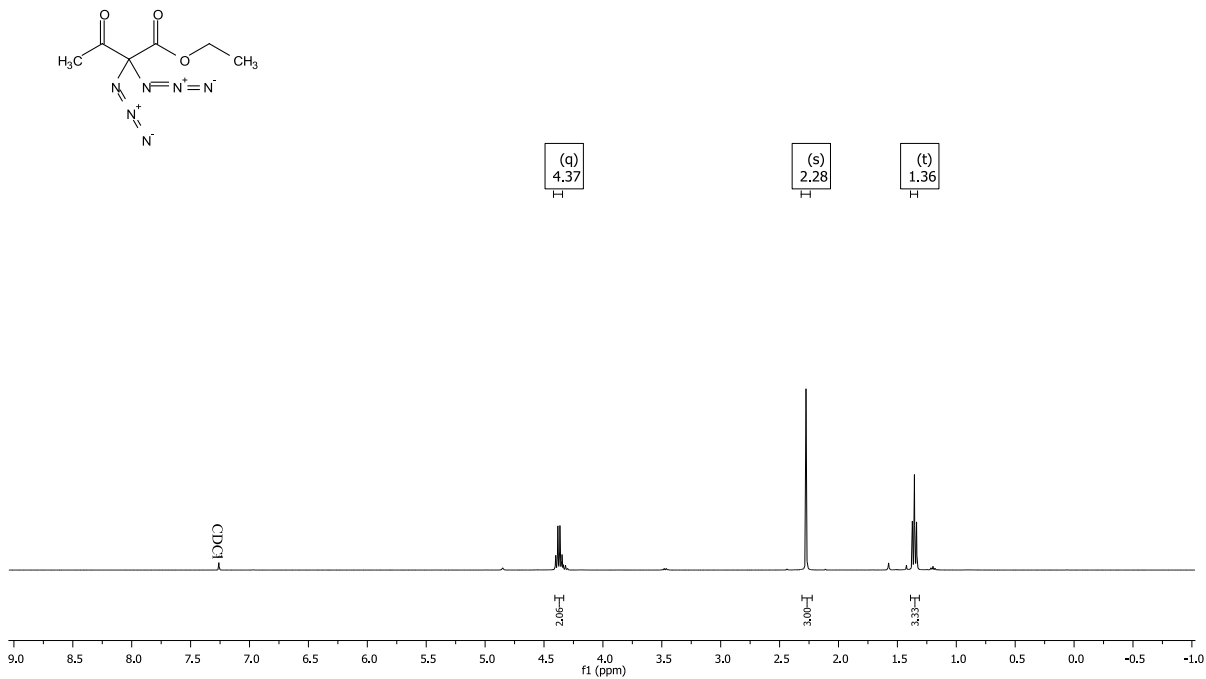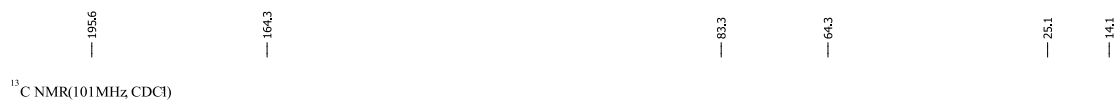

$^{13}\text{C}$  NMR(101MHz CDCl<sub>3</sub>)

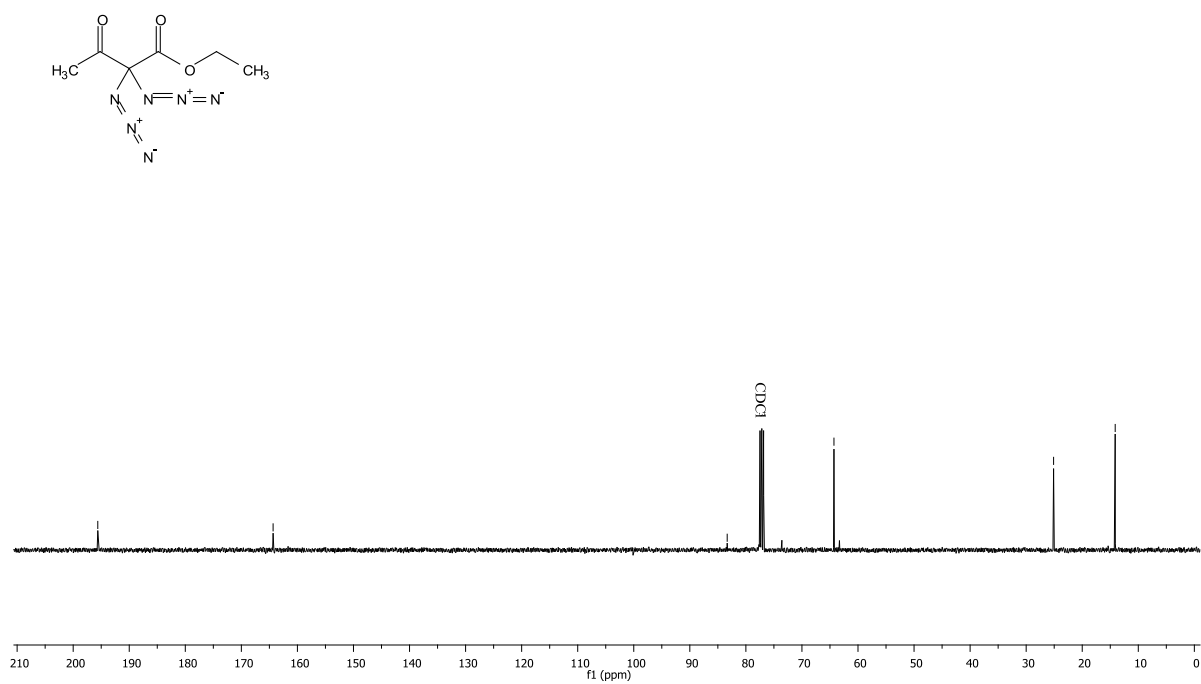



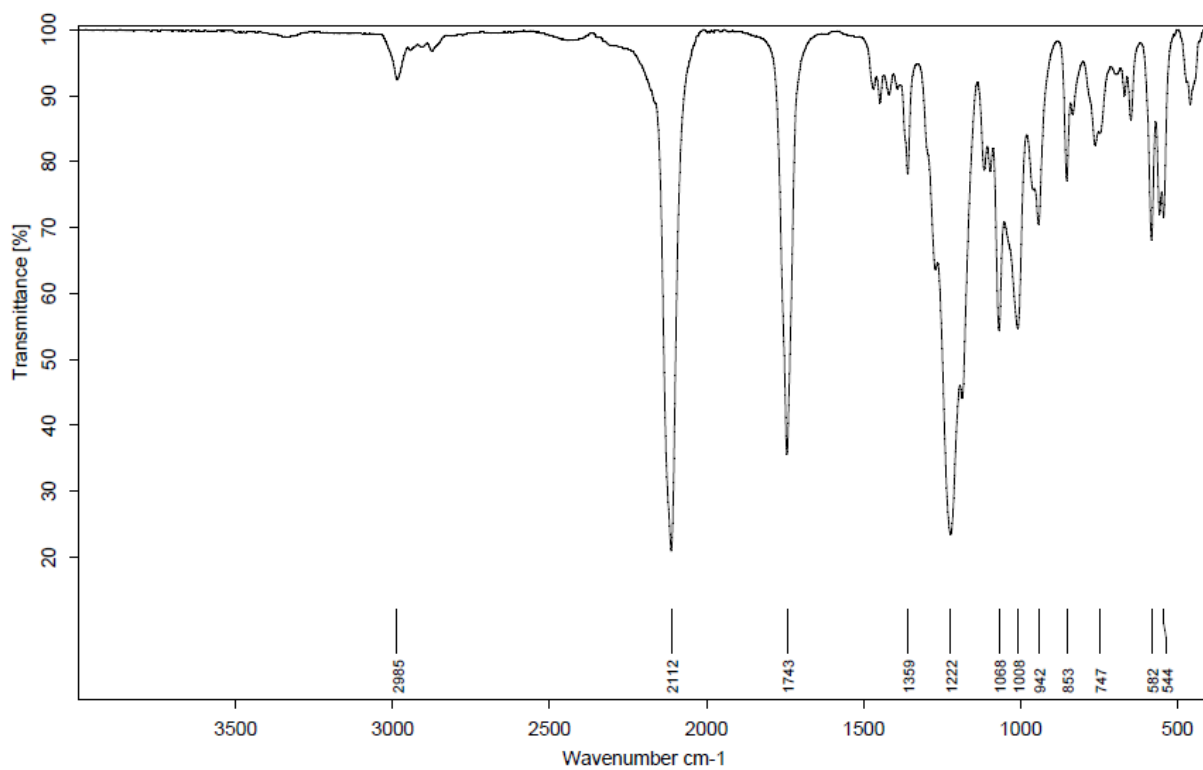

**ethyl 2,2-bis(4,5,6,7,8,9-hexahydro-1H-cycloocta[d][1,2,3]triazol-1-yl)-3-oxobutanoate**

<sup>1</sup>H NMR(600MHz CDCl<sub>3</sub>)

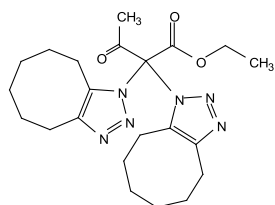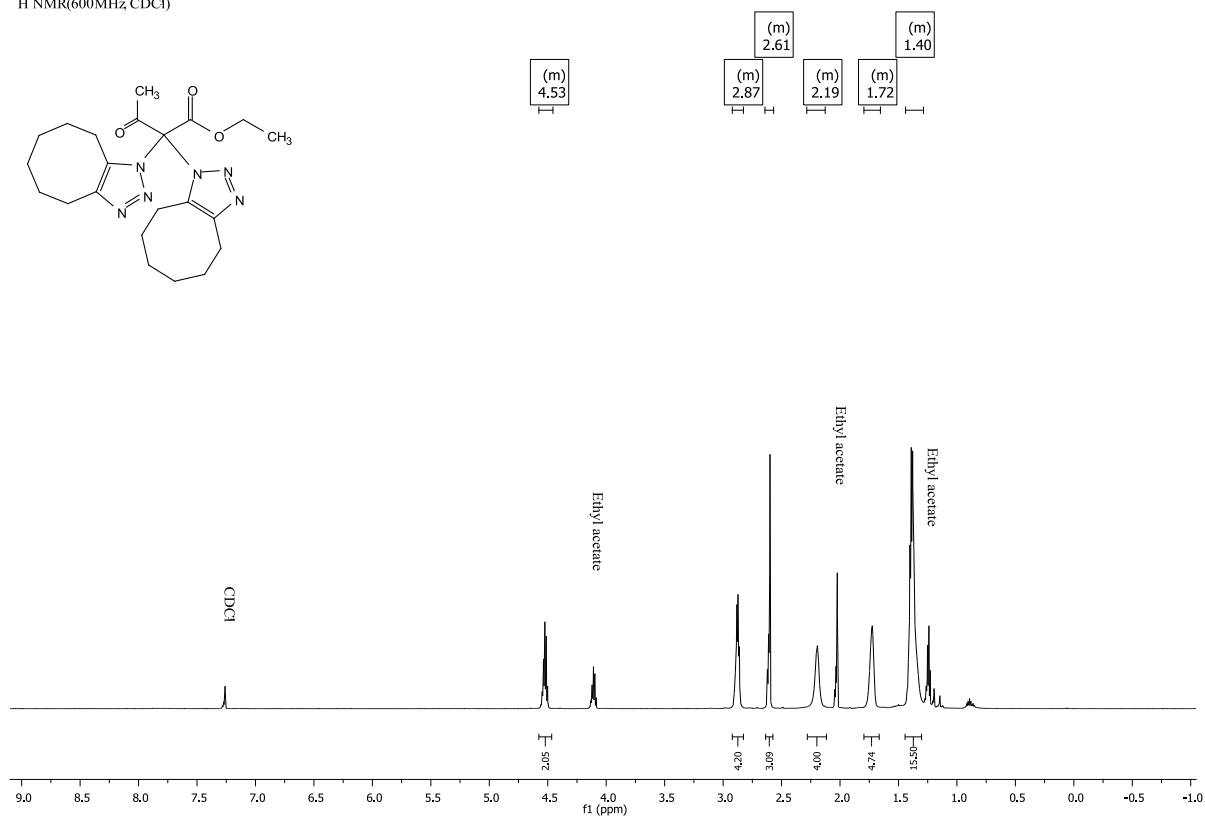



<sup>13</sup>C NMR(151MHz CDCl<sub>3</sub>)

161.2  
160.3

141.1

138.8

70.7

65.4

52.7

14.0

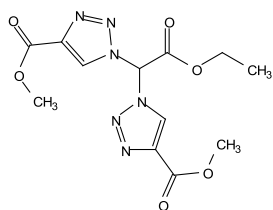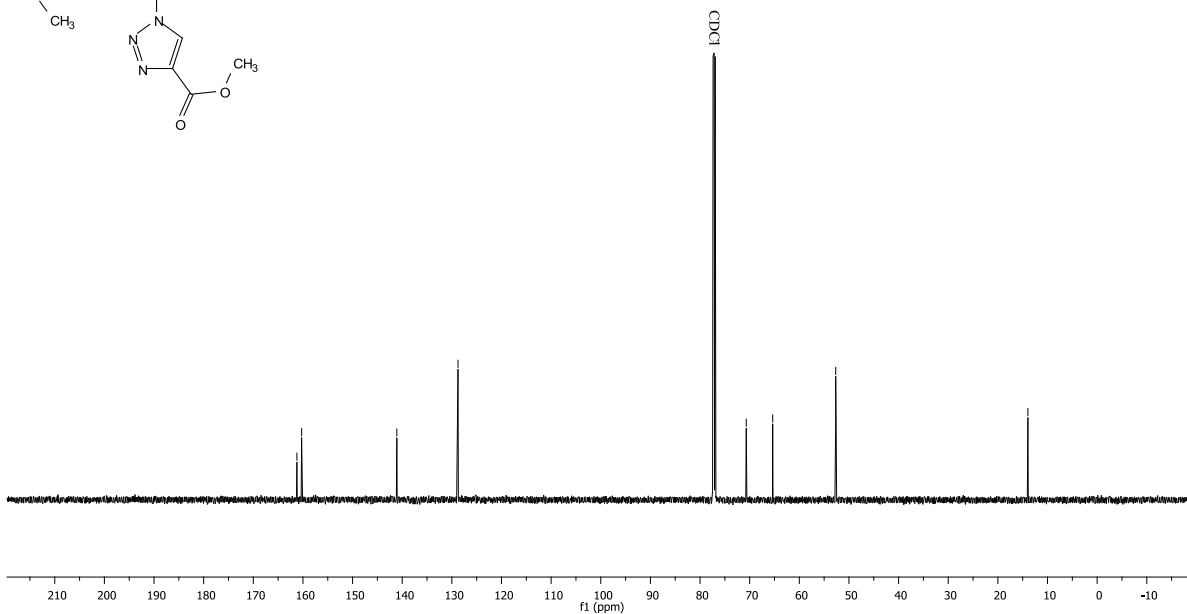

<sup>15</sup>N NMR(61 MHz DMSO)

-13.3  
-20.3  
-20.3

-134.4  
-134.5  
-134.5

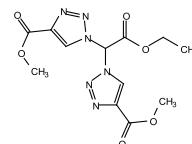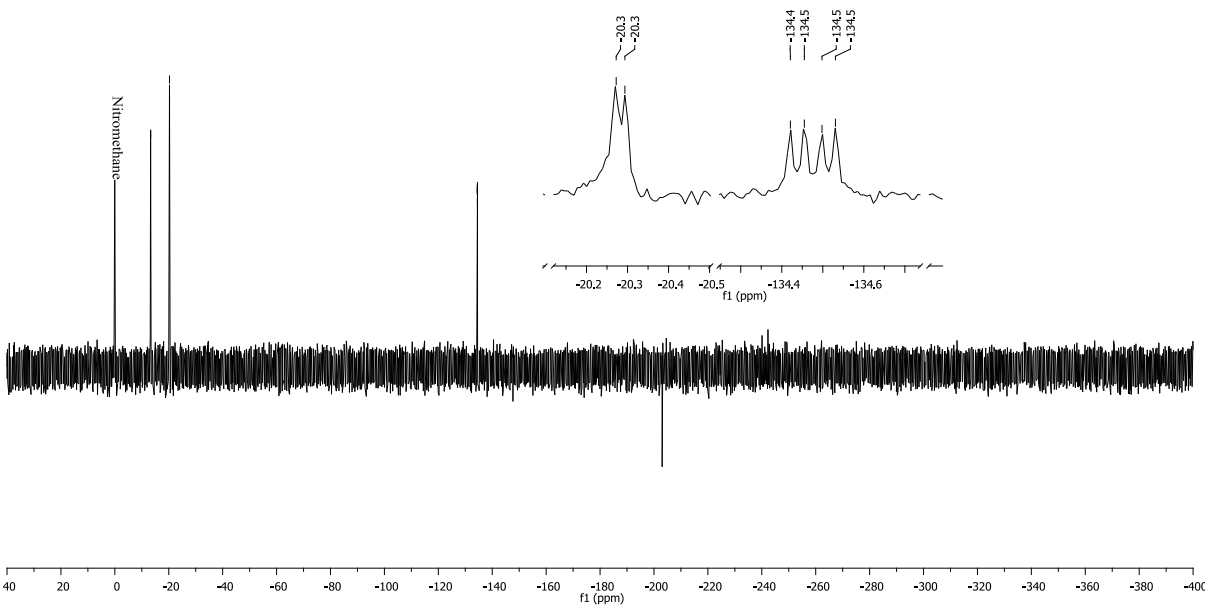

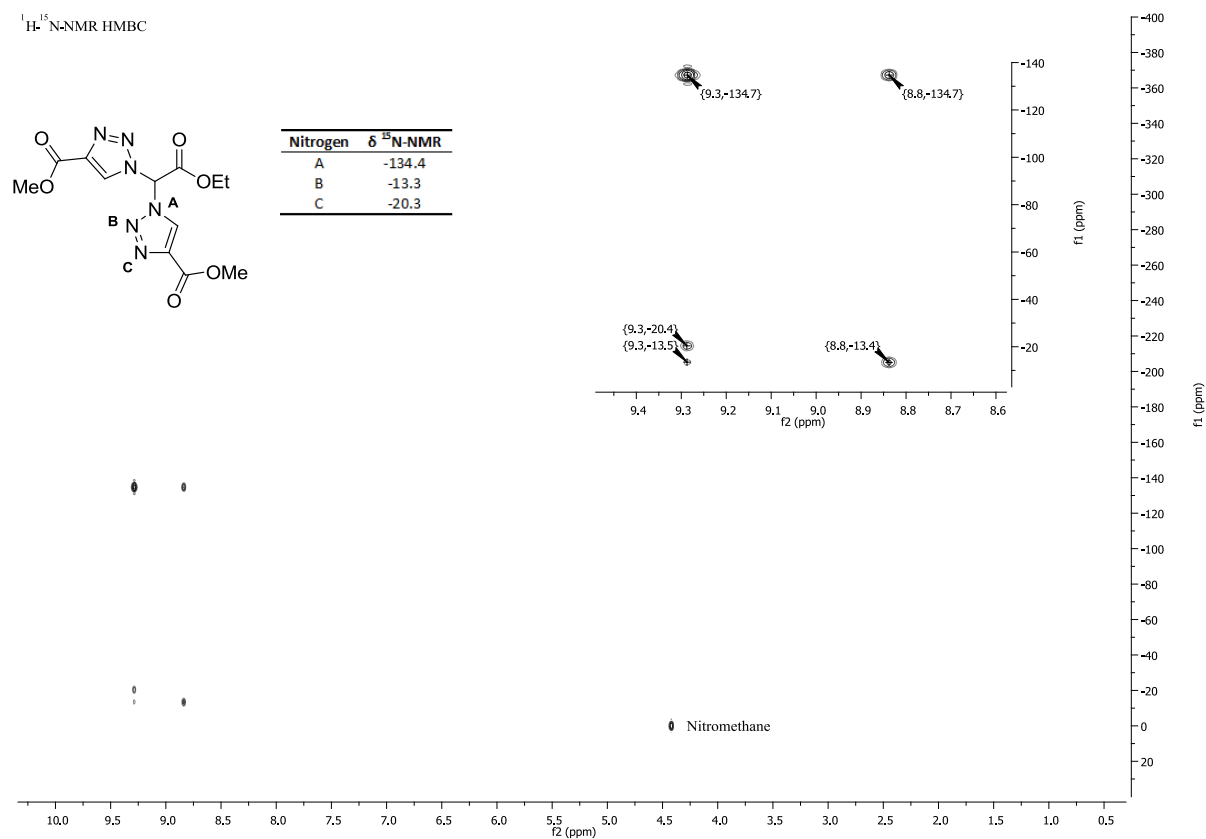

**dibenzyl 1,1'-(2-ethoxy-2-oxoethane-1,1-diyl)bis(1H-1,2,3-triazole-4-carboxylate) (2b)**

$^1\text{H}$  NMR(400MHz CDCl<sub>3</sub>)

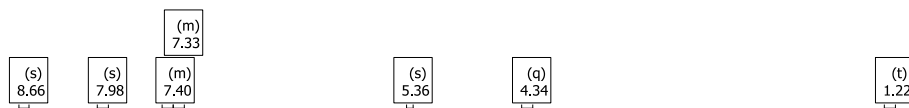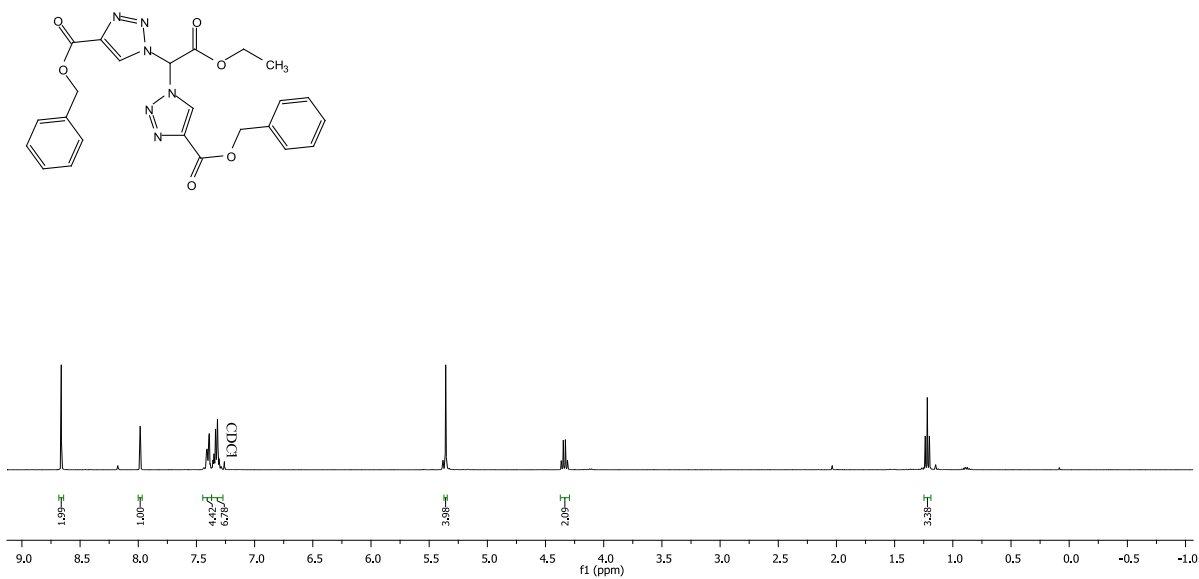

<sup>13</sup>C NMR(101MHz CDCl<sub>3</sub>)

161.4  
159.7

140.7

135.1

129.1

128.7

128.7

128.6

70.6

67.4

65.1

13.8

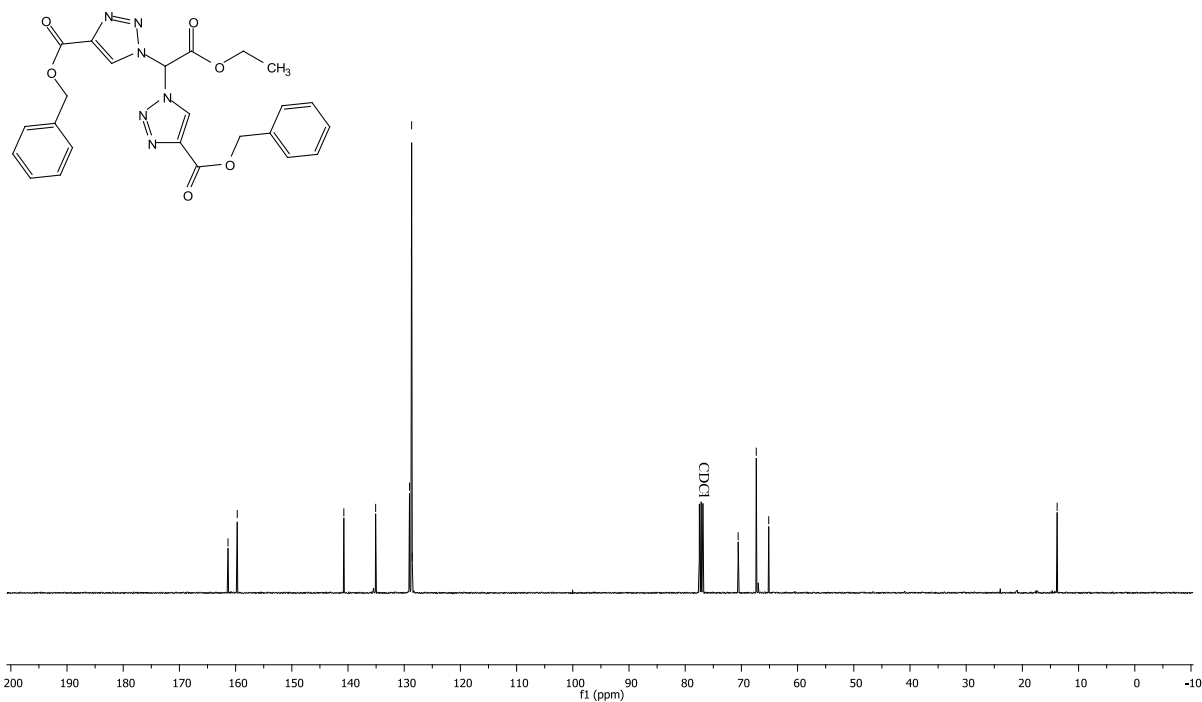

### ethyl 2,2-bis(4-cyclopropyl-1H-1,2,3-triazol-1-yl)acetate (2c)

<sup>1</sup>H NMR(600MHz CDCl<sub>3</sub>)

(s)  
7.46

(s)  
7.63

(q)  
4.37

(m)  
1.94

(t)  
1.29

(m)  
0.96

(m)  
0.86

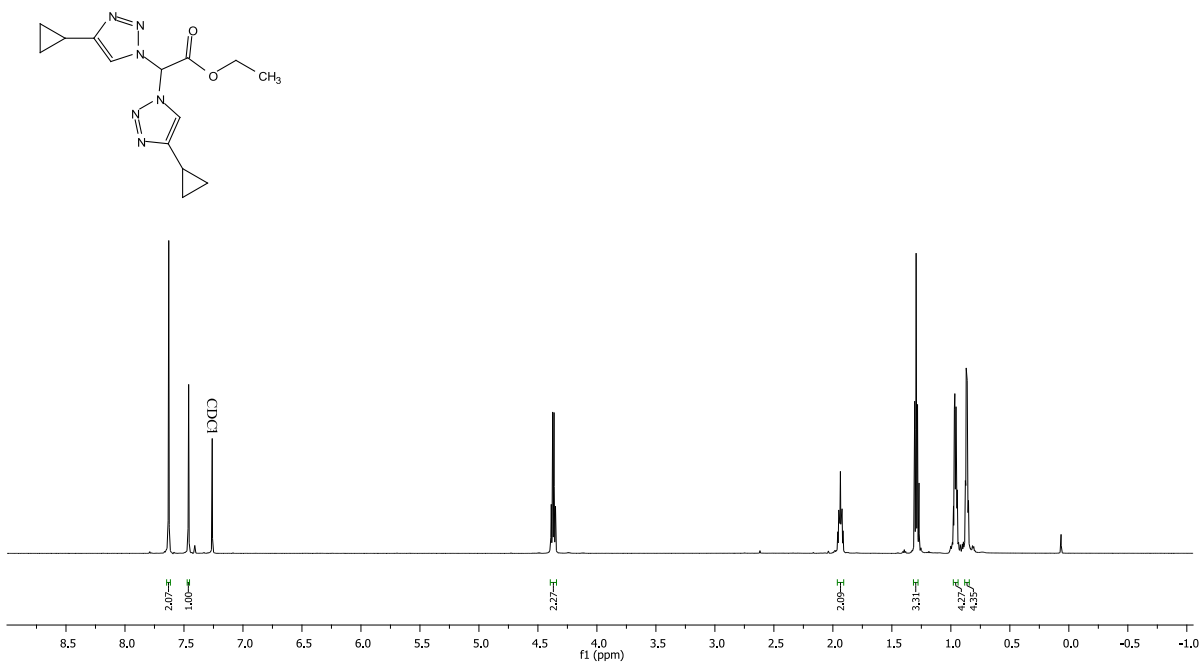

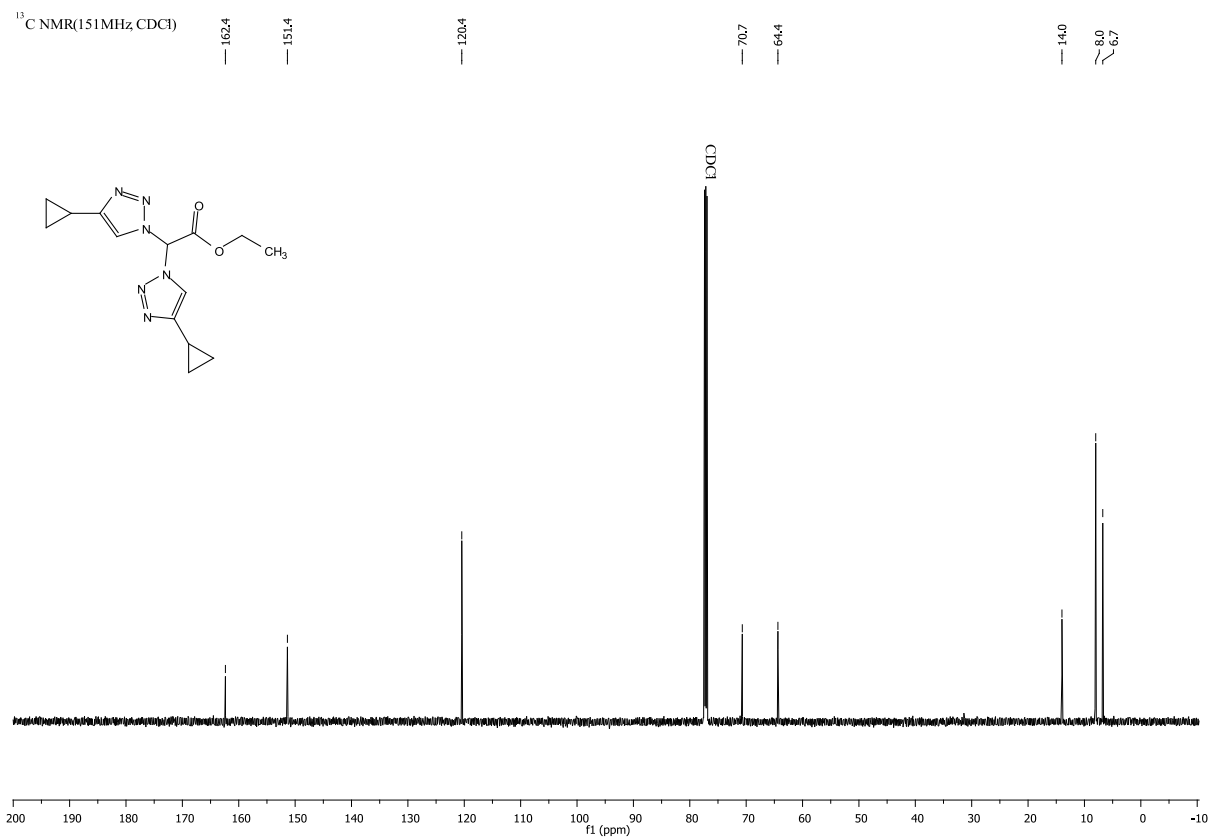

### ethyl 2,2-bis(4-(4-bromophenyl)-1H-1,2,3-triazol-1-yl)acetate (2d)

<sup>1</sup>H NMR (400 MHz, CDCl<sub>3</sub>)

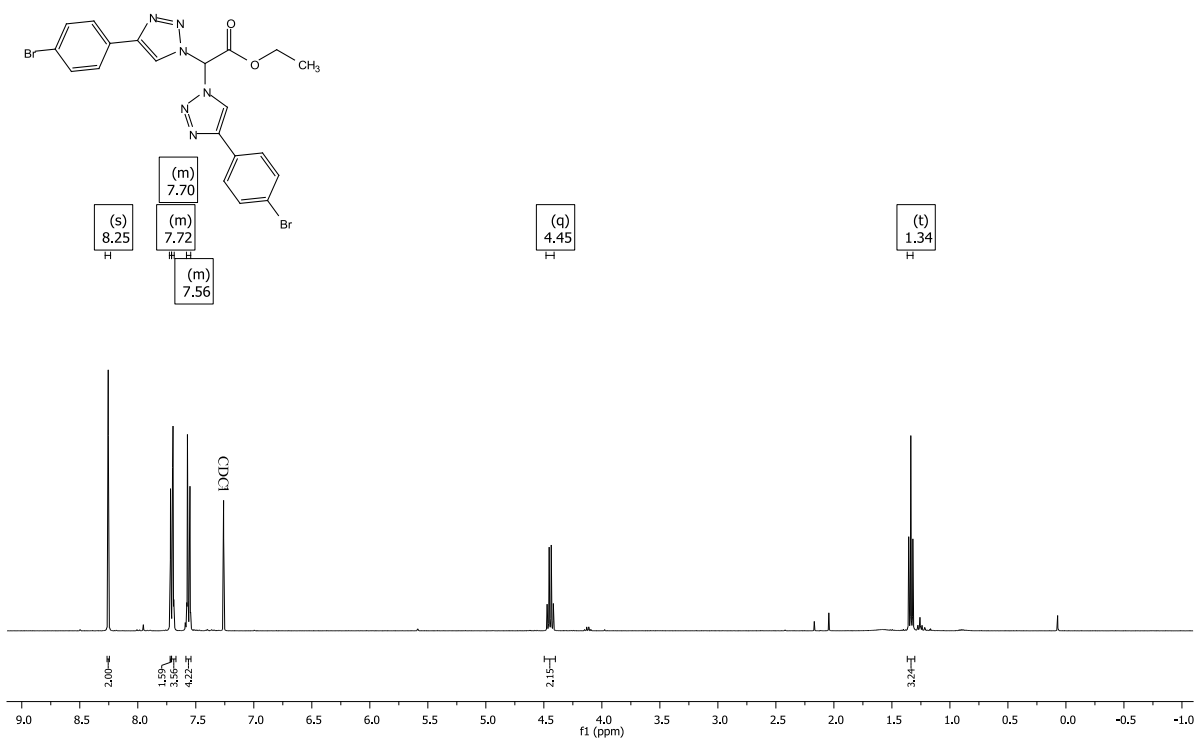

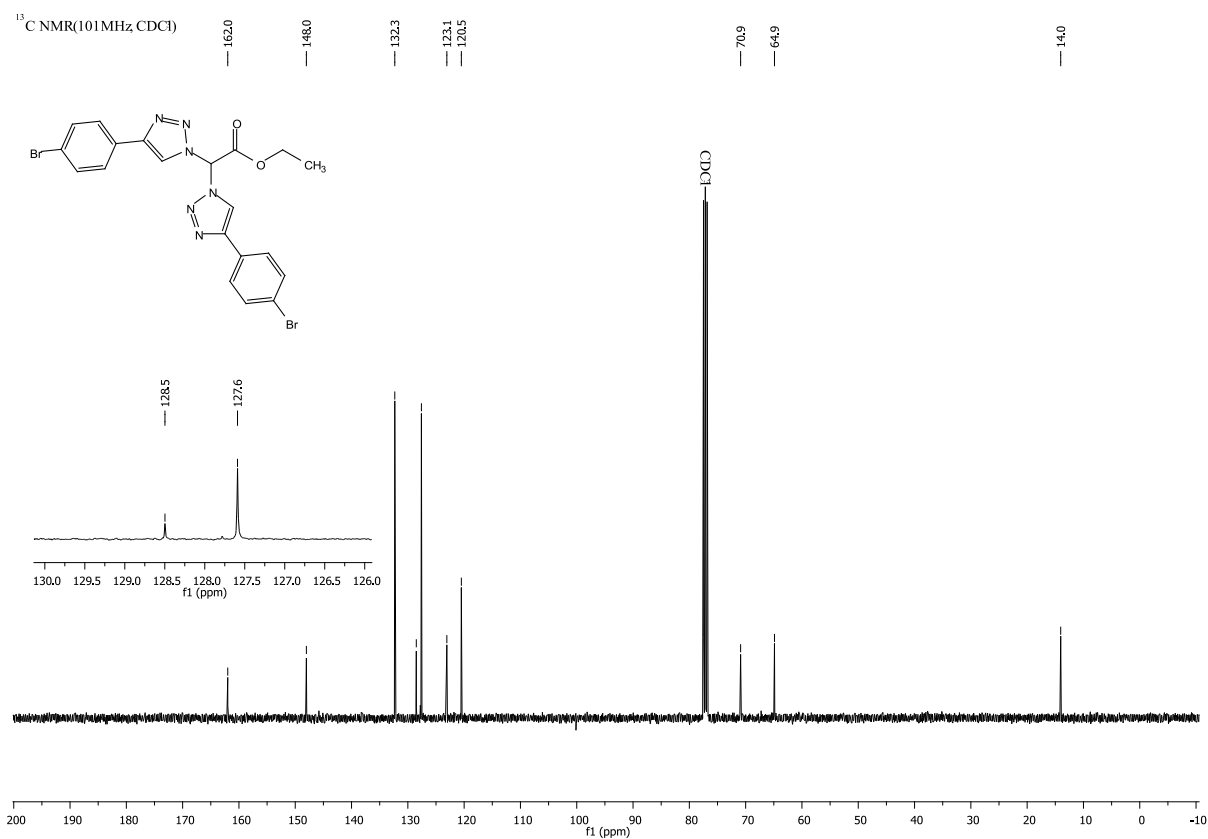

### ethyl 2,2-bis(4-(4-propylphenyl)-1H-1,2,3-triazol-1-yl)acetate (2e)

<sup>1</sup>H NMR(600MHz CDCl<sub>3</sub>)

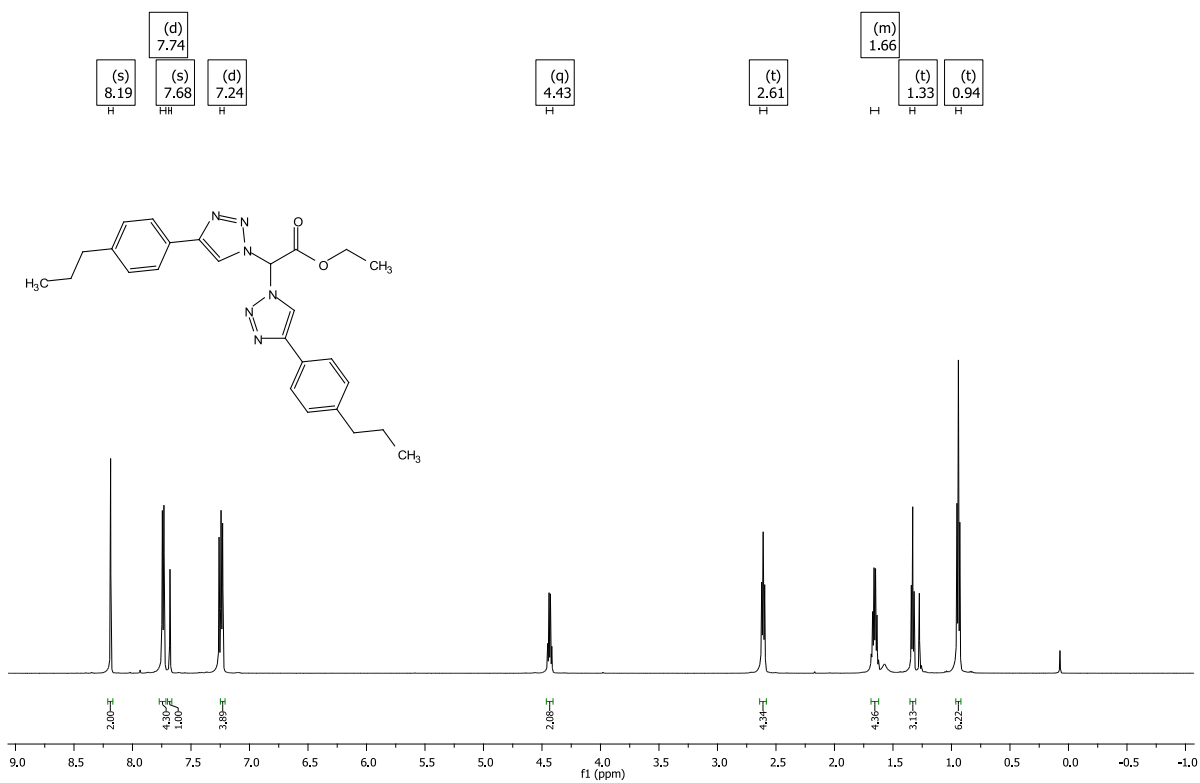

<sup>13</sup>C NMR(151MHz CDCl<sub>3</sub>)

162.2  
149.1  
143.7  
139.2  
137.0  
126.0  
119.9  
71.0  
64.6  
38.0  
24.5  
14.0  
13.9

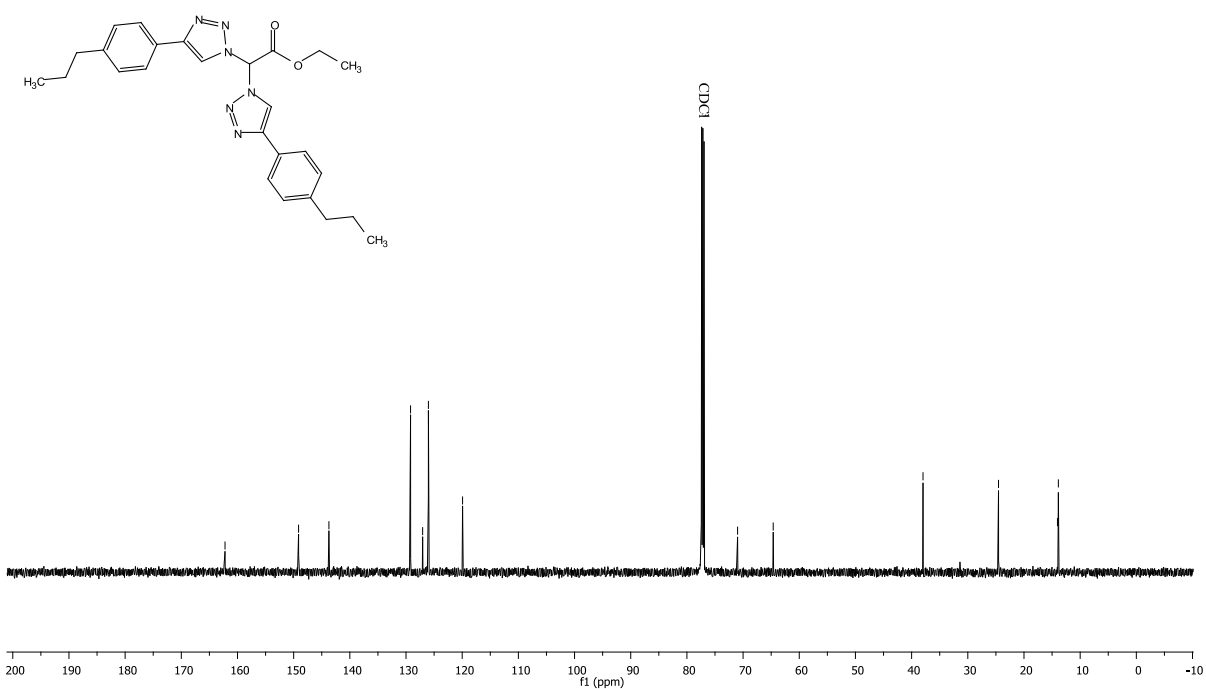

### ethyl 2,2-bis(4-phenyl-1H-1,2,3-triazol-1-yl)acetate (2f)

<sup>1</sup>H NMR(600MHz CDCl<sub>3</sub>)

(d) 7.84  
(t) 7.43  
(s) 8.25  
(s) 7.71  
(t) 7.36  
(q) 4.45  
(t) 1.34

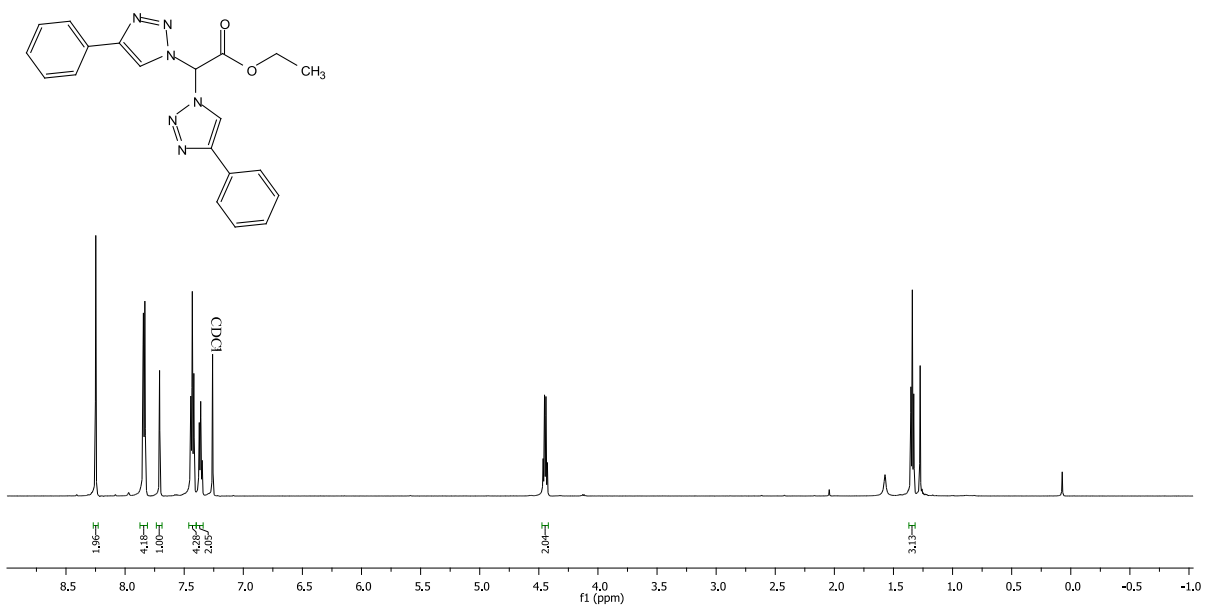



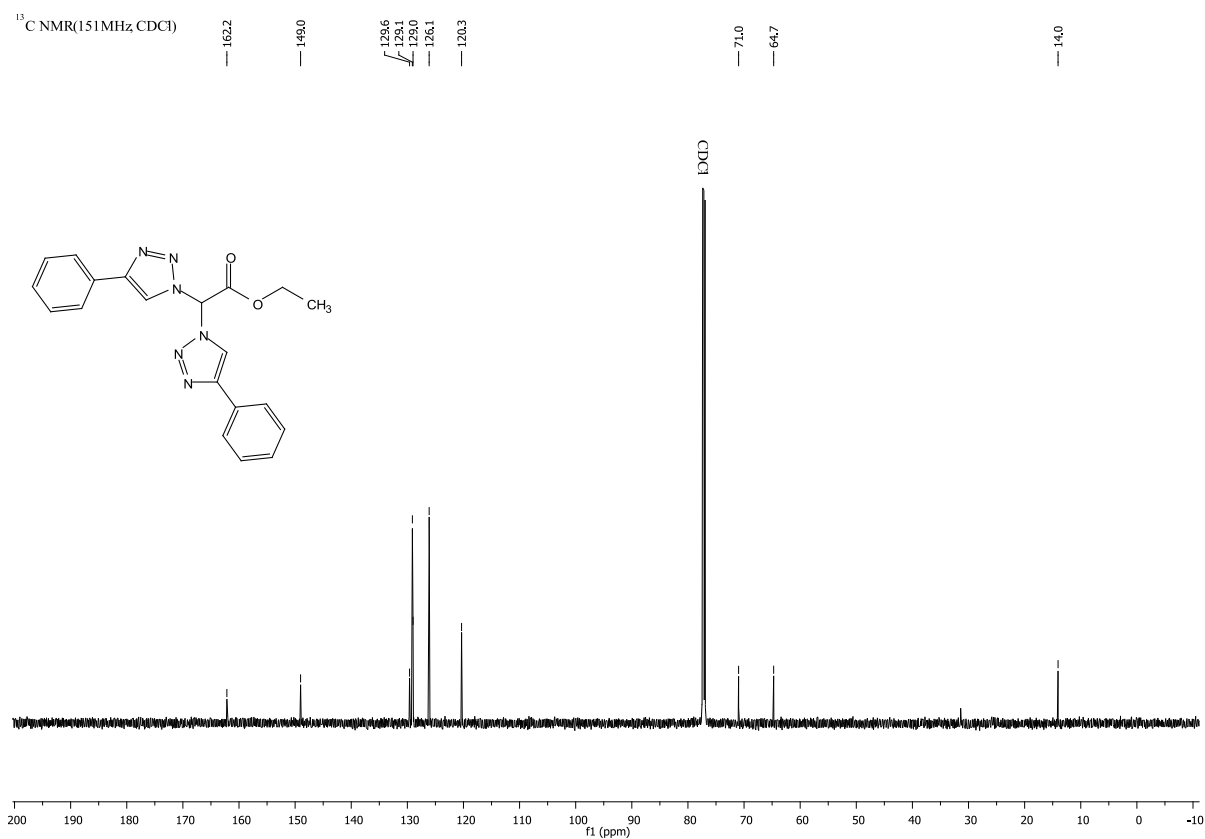

### dimethyl 1,1'-(azidomethylene)bis(1*H*-1,2,3-triazole-4-carboxylate) (3a)

<sup>1</sup>H NMR(400MHz CDCl<sub>3</sub>)

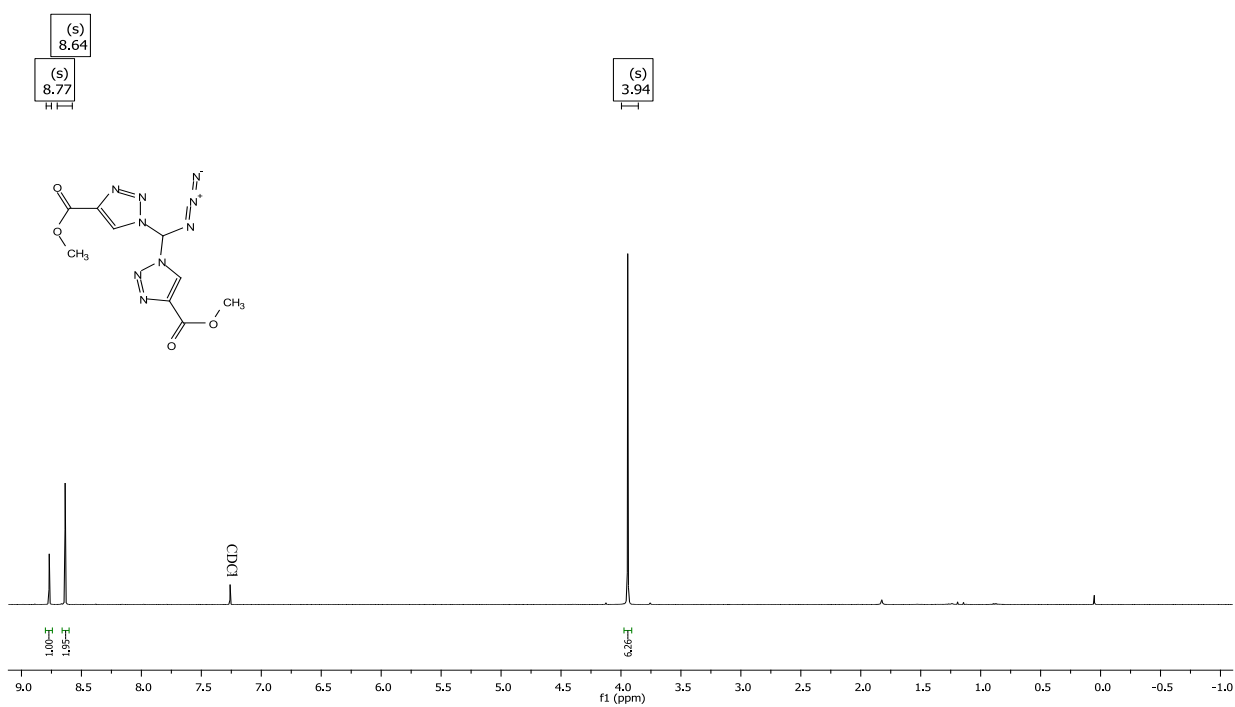

<sup>13</sup>C NMR(101 MHz CDCl<sub>3</sub>)

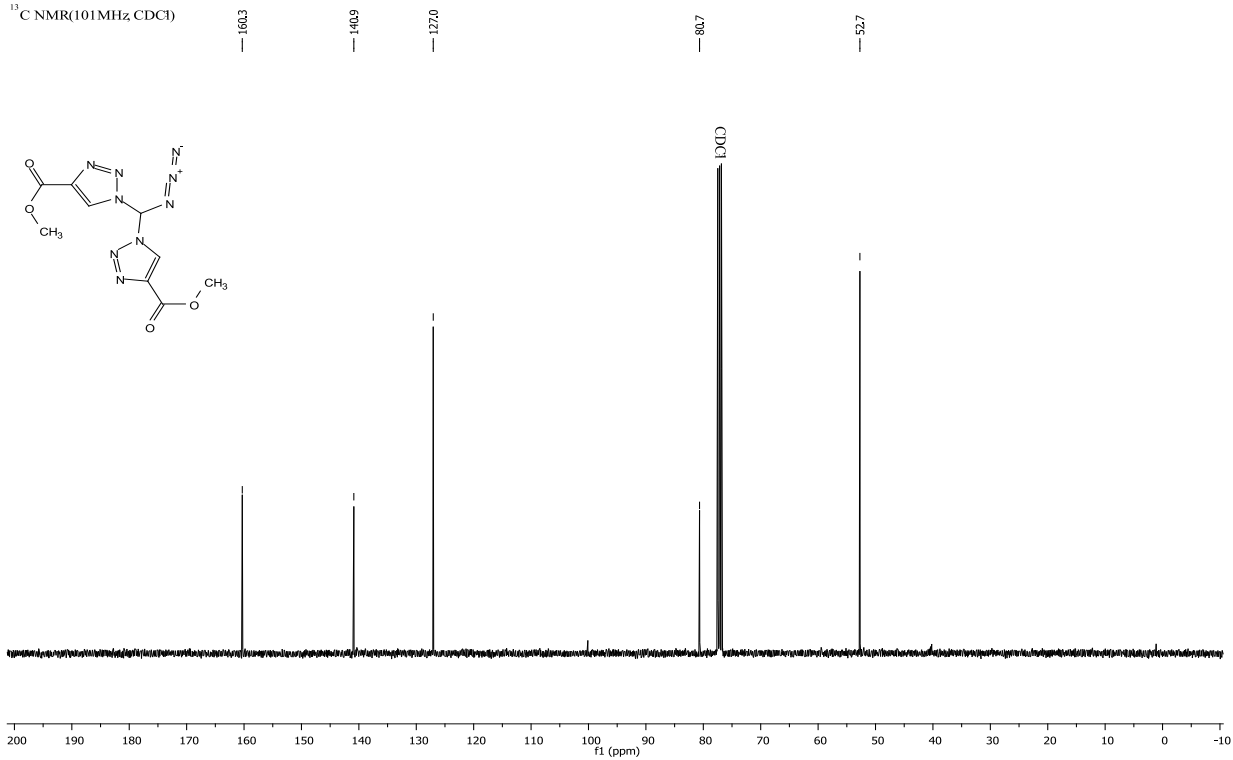

<sup>15</sup>N NMR(61 MHz DMSO)

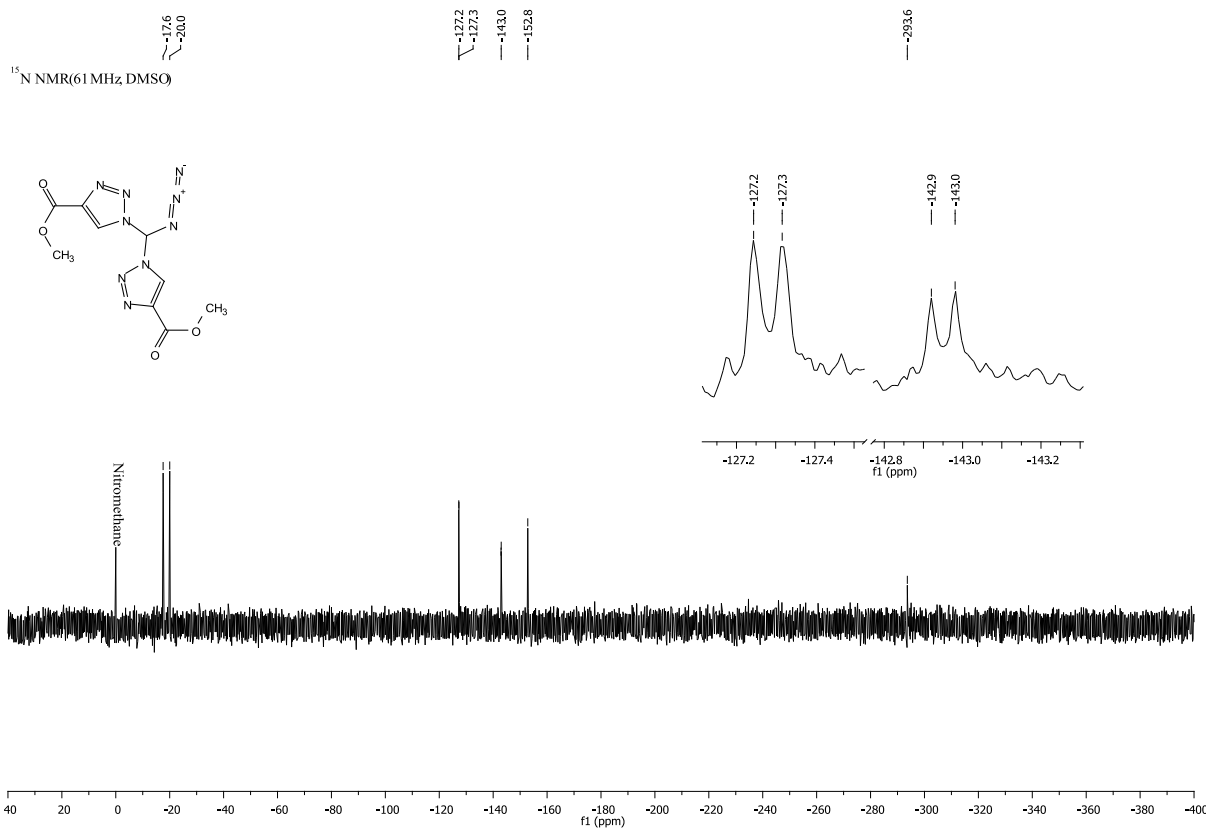

$^1\text{H}$ - $^{15}\text{N}$ -NMR HMBC

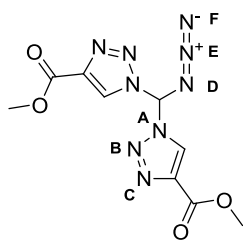

| Nitrogen       | $\delta$ $^{15}\text{N}$ -NMR |
|----------------|-------------------------------|
| A              | -127.2                        |
| B              | -17.6                         |
| C              | -20.0                         |
| D <sup>a</sup> | -293.6                        |
| E <sup>a</sup> | -143.0                        |
| F <sup>a</sup> | -152.8                        |

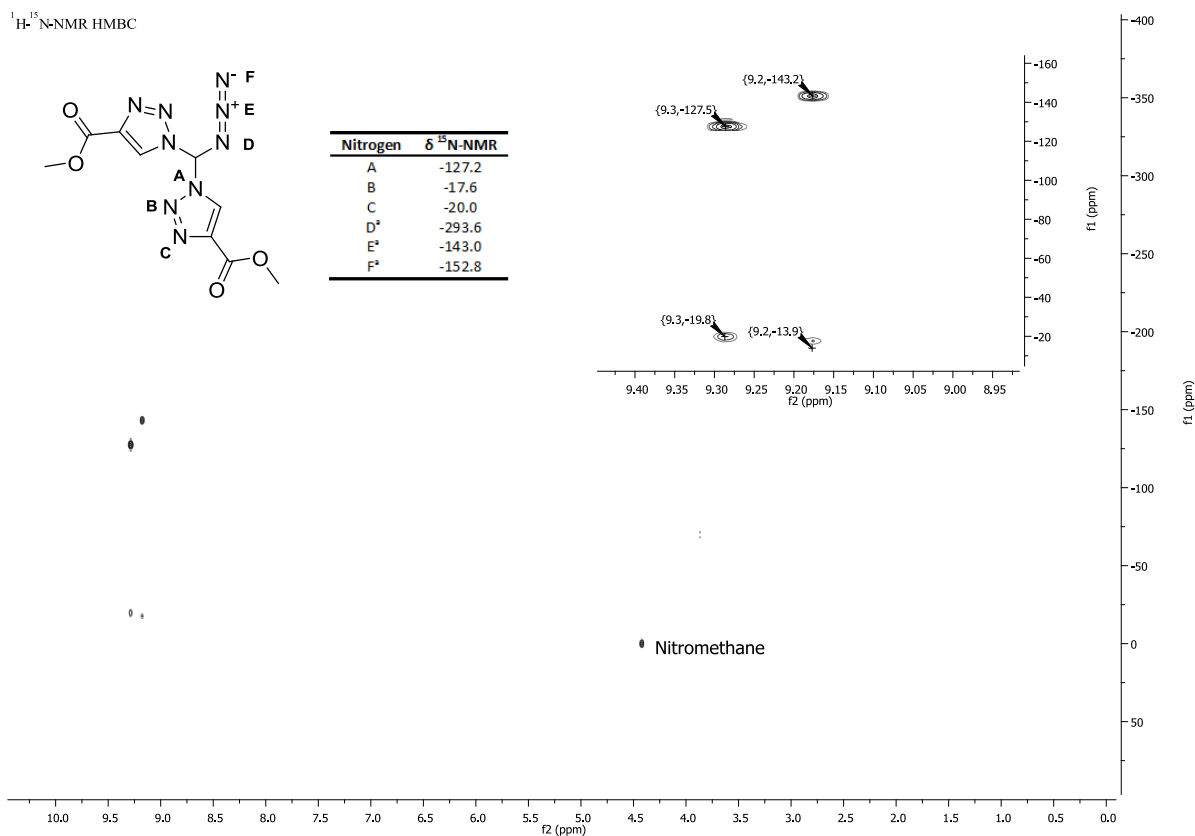

<sup>a</sup> On the basis of the  $^{15}\text{N}$  and HMBC NMR spectra, an assignment of the chemical shifts for the individual azide nitrogens was not possible with full certainty. The assignment is based on the  $^{15}\text{N}$  data collection found in: Berger Stefan; Braun, Siegmur; Kalinowski, Hans-Otto. *NMR-Spektroskopie von Nichtmetallen:  $^{15}\text{N}$ -NMR-Spektroskopie*. Stuttgart, New York: Georg Thieme Verlag, 1992. Print.

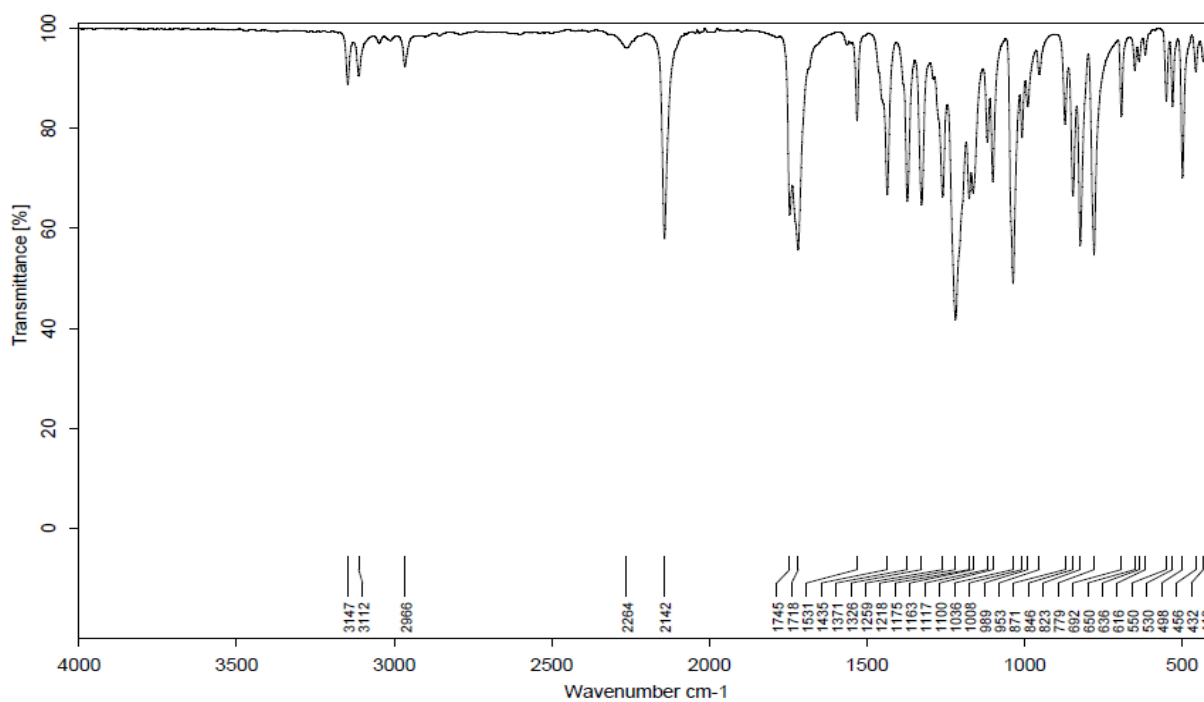

# dibenzyl 1,1'-(azidomethylene)bis(1*H*-1,2,3-triazole-4-carboxylate) (3b)

<sup>1</sup>H NMR(400MHz CDCl<sub>3</sub>)

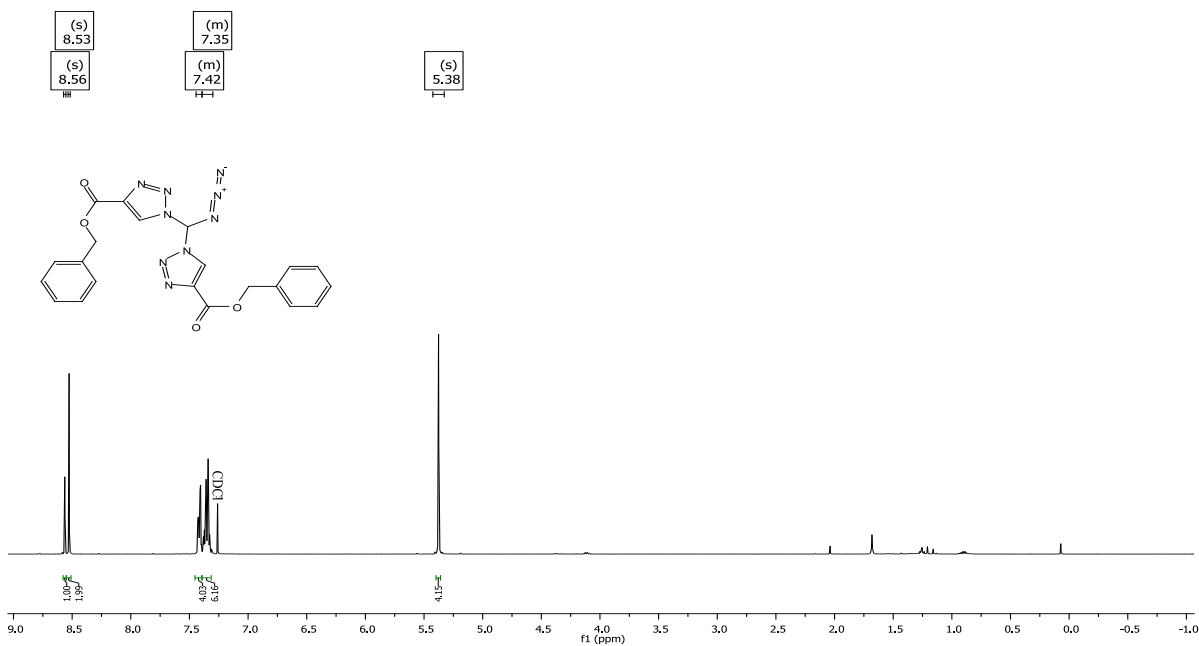

<sup>13</sup>C NMR(101MHz CDCl<sub>3</sub>)

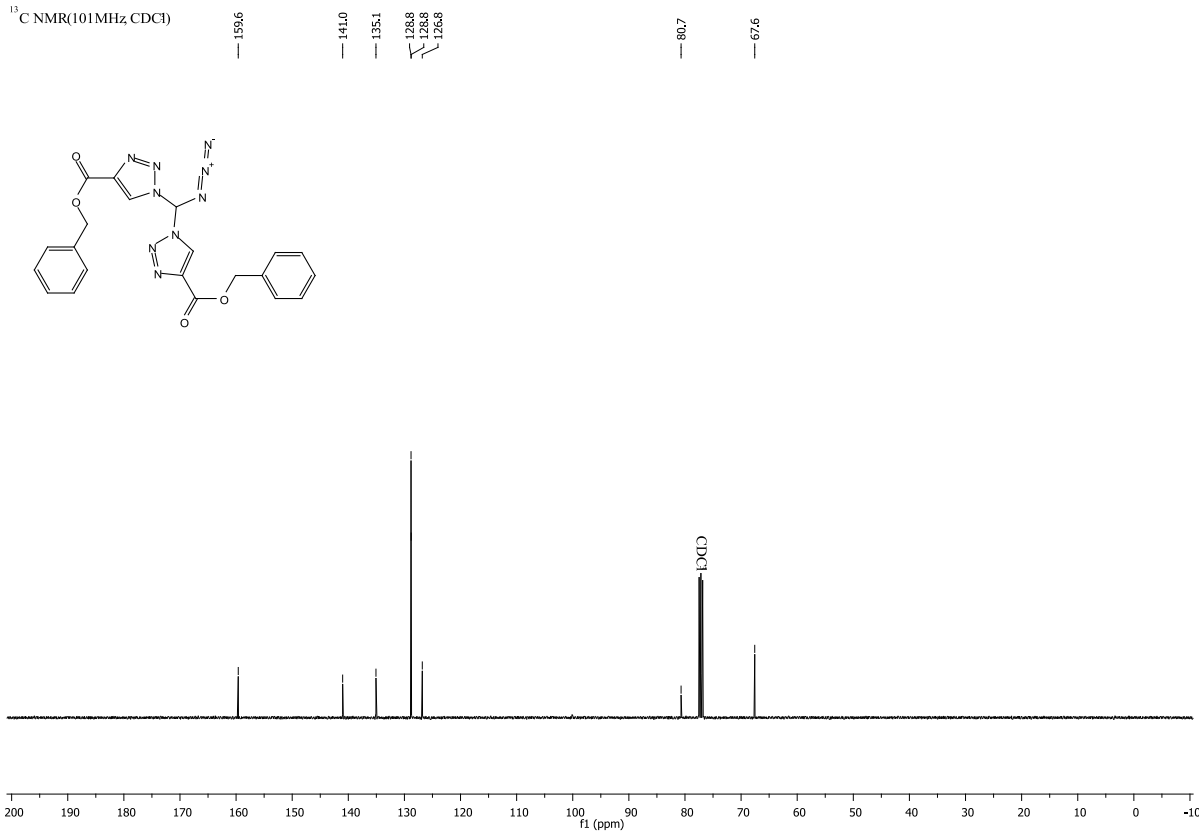

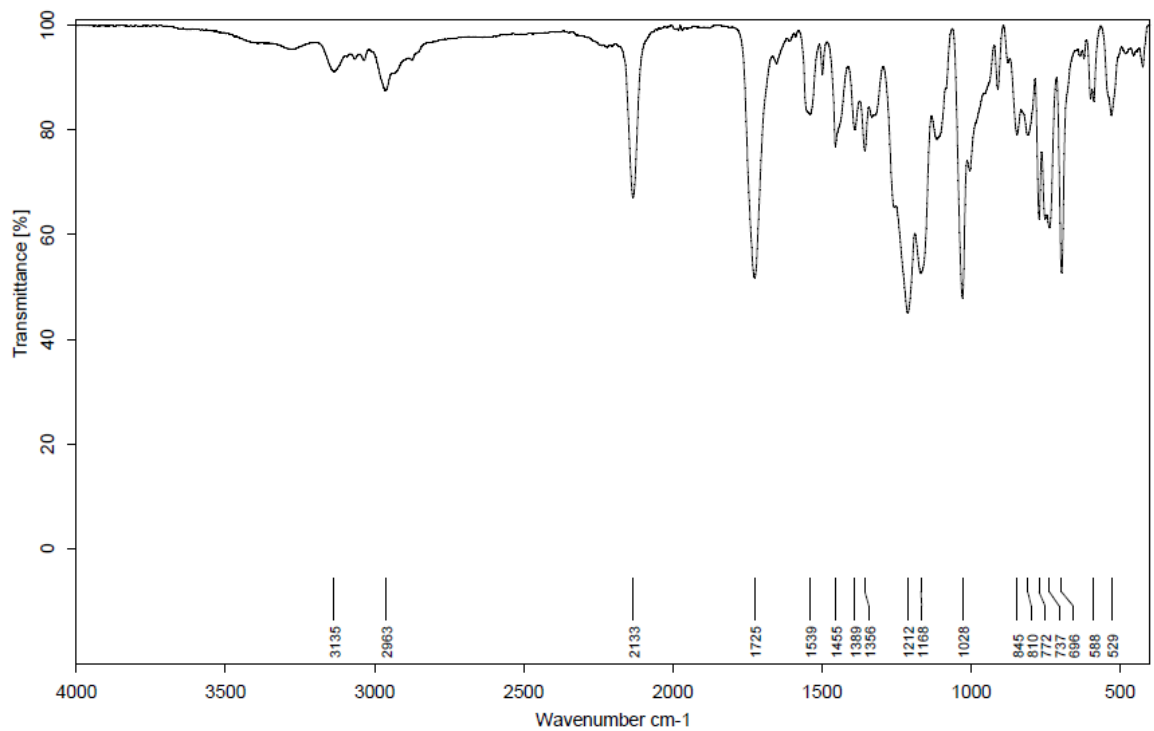

### 1,1'-(azidomethylene)bis(4-cyclopropyl-1H-1,2,3-triazole) (3c)

<sup>1</sup>H NMR(400MHz CDCl<sub>3</sub>)

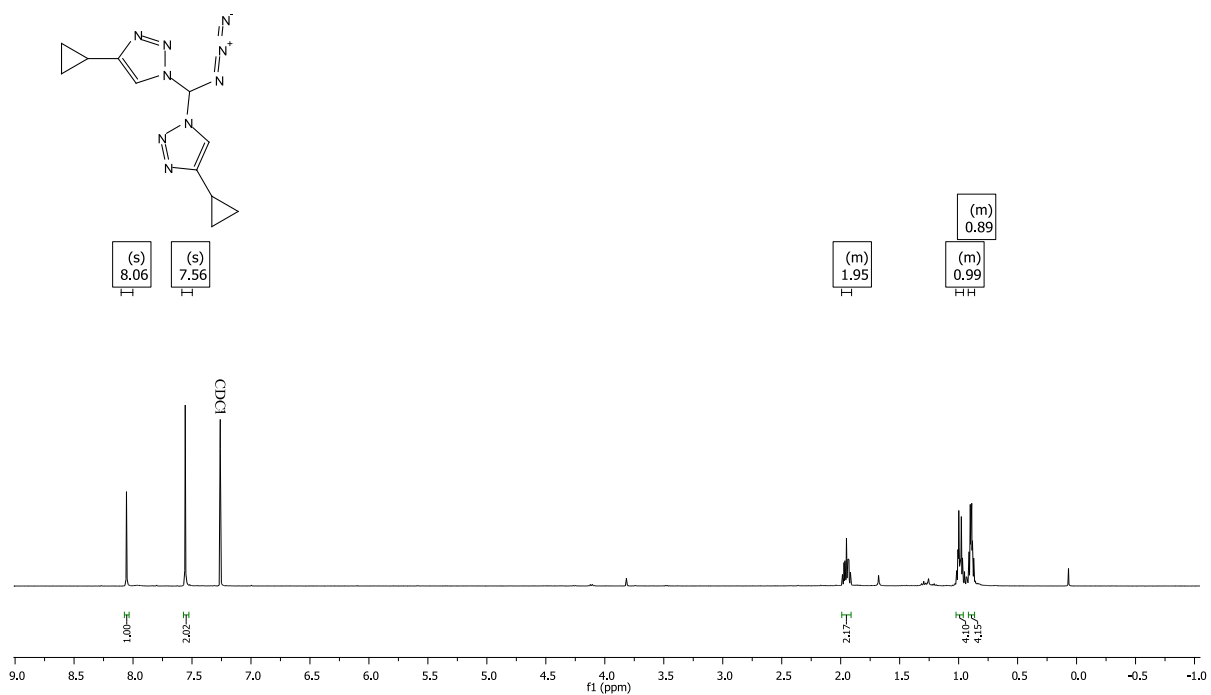

<sup>13</sup>C NMR(101MHz, CDCl<sub>3</sub>)

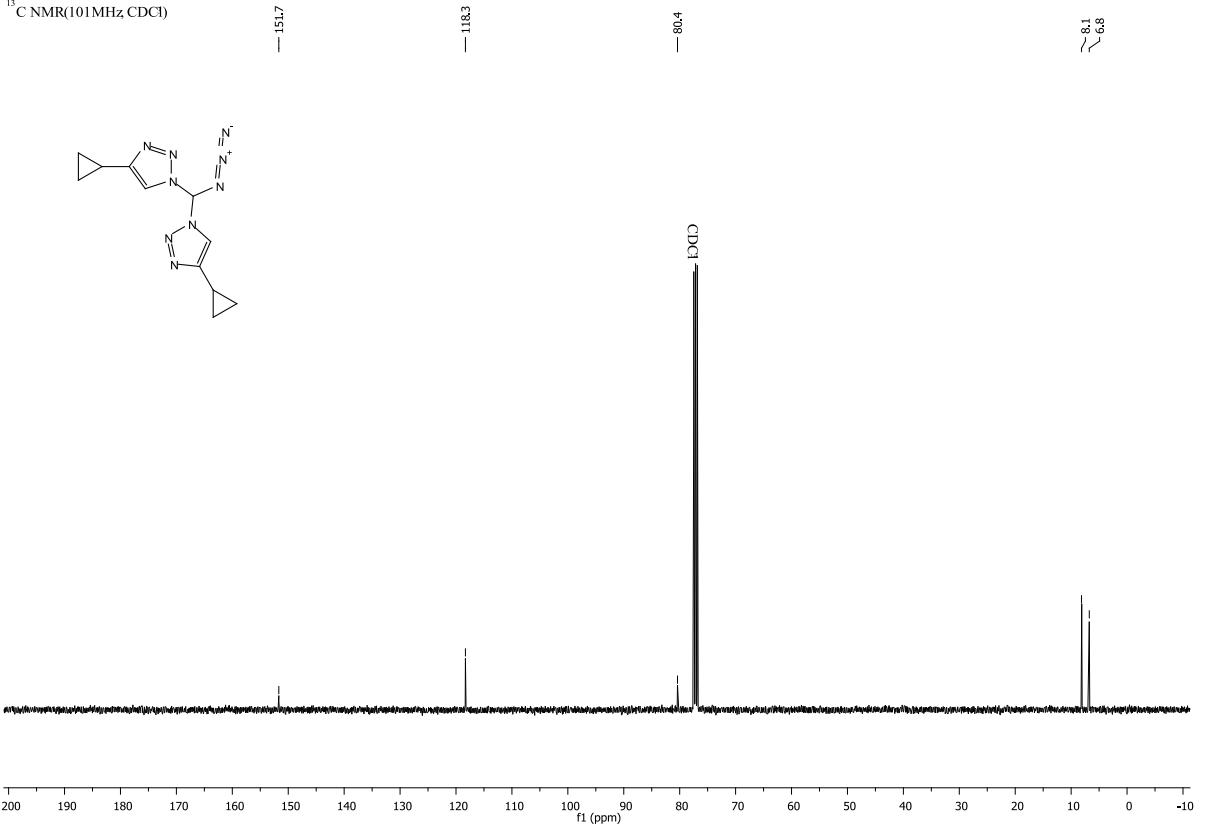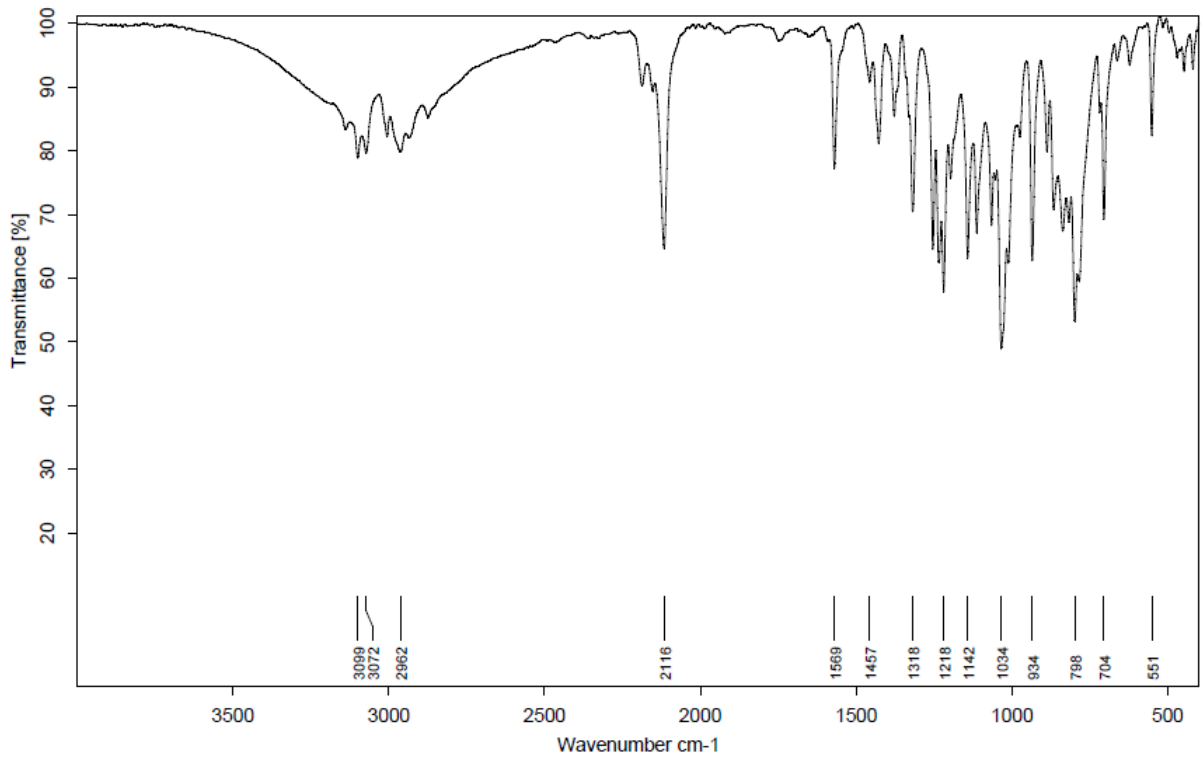

# 1,1'-(azidomethylene)bis(4-(4-bromophenyl)-1H-1,2,3-triazole) (3d)

<sup>1</sup>H NMR(400MHz CDCl<sub>3</sub>)

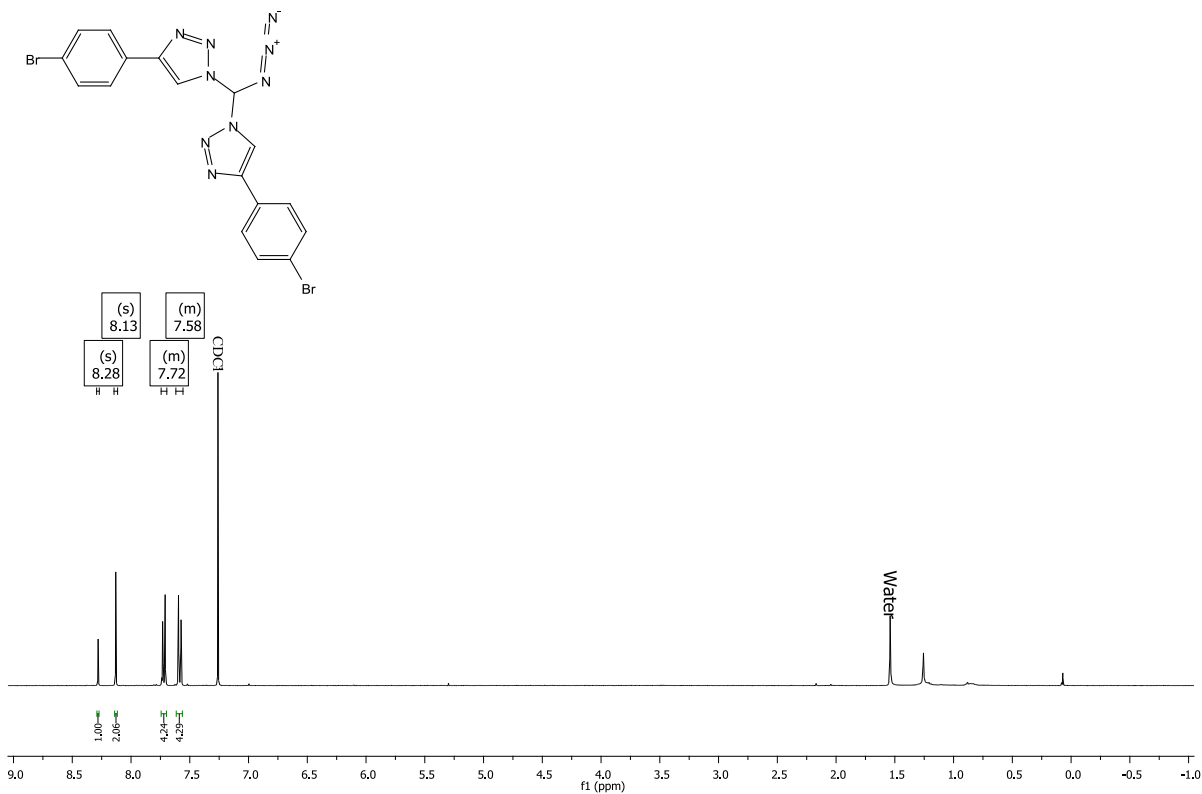

<sup>13</sup>C NMR(101MHz CDCl<sub>3</sub>)

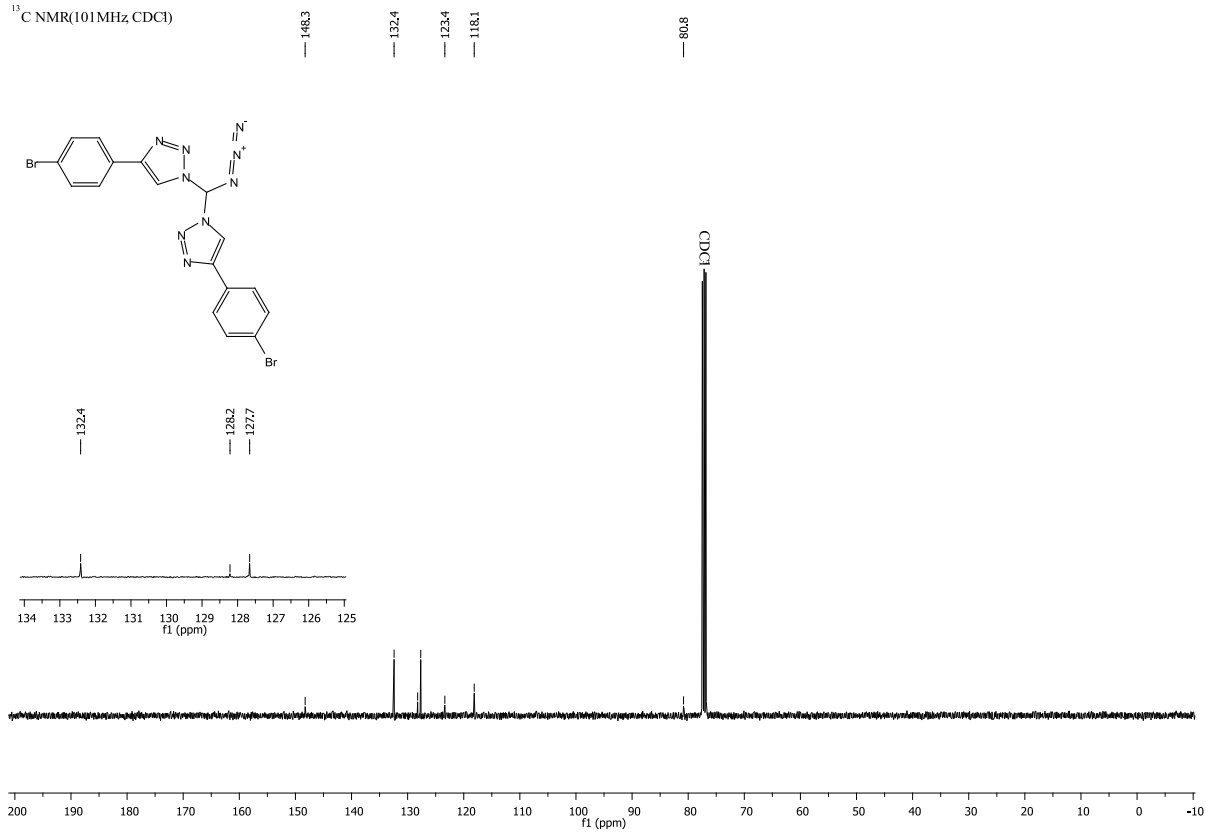

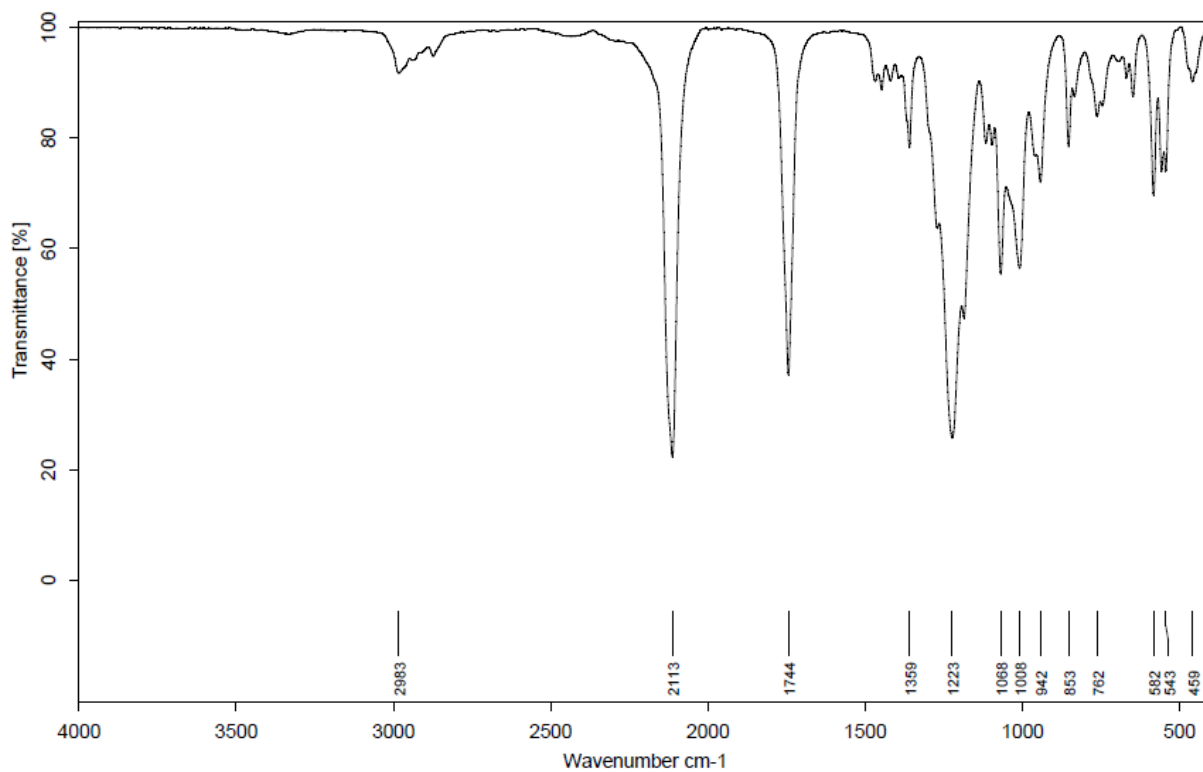

### 1,1'-(azidomethylene)bis(4-(4-propylphenyl)-1H-1,2,3-triazole) (3e)

<sup>1</sup>H NMR(400MHz CDCl<sub>3</sub>)

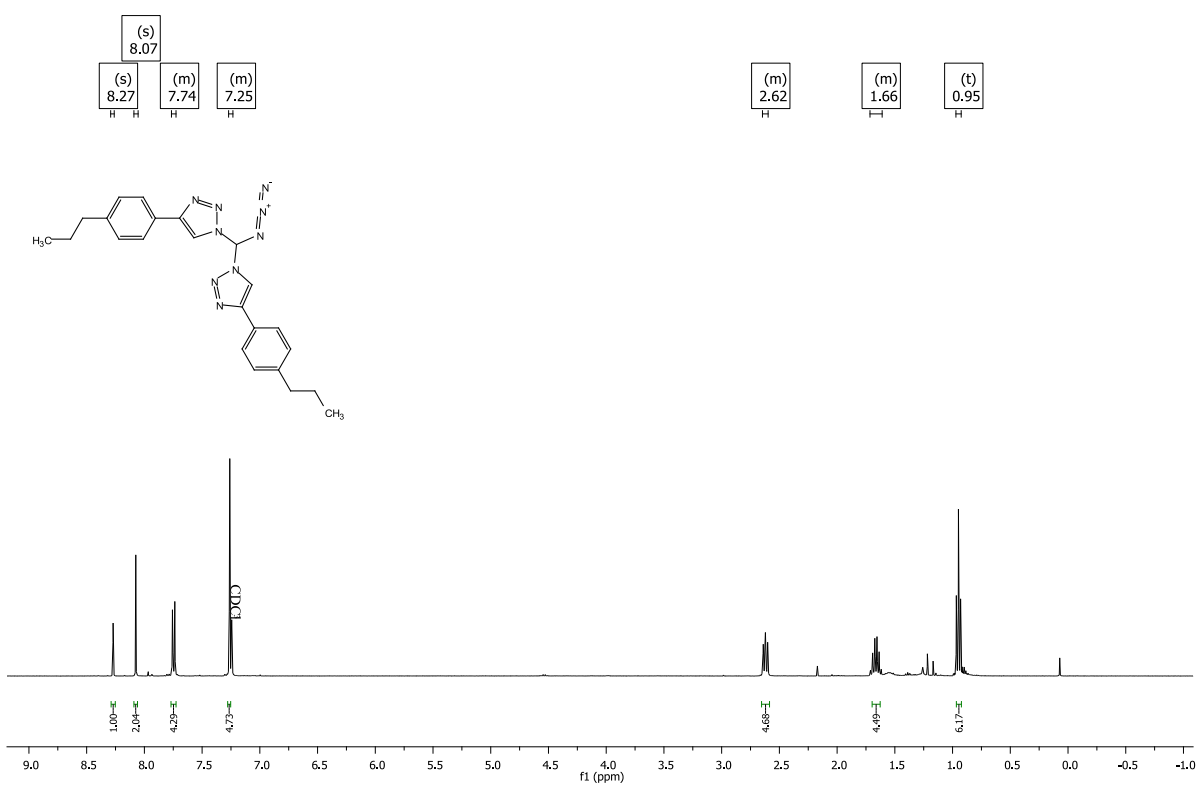



<sup>13</sup>C NMR(101MHz CDCl<sub>3</sub>)

— 149.4

— 144.0

— 129.3

— 126.1

— 117.6

— 80.8

— 38.0

— 24.5

— 13.9

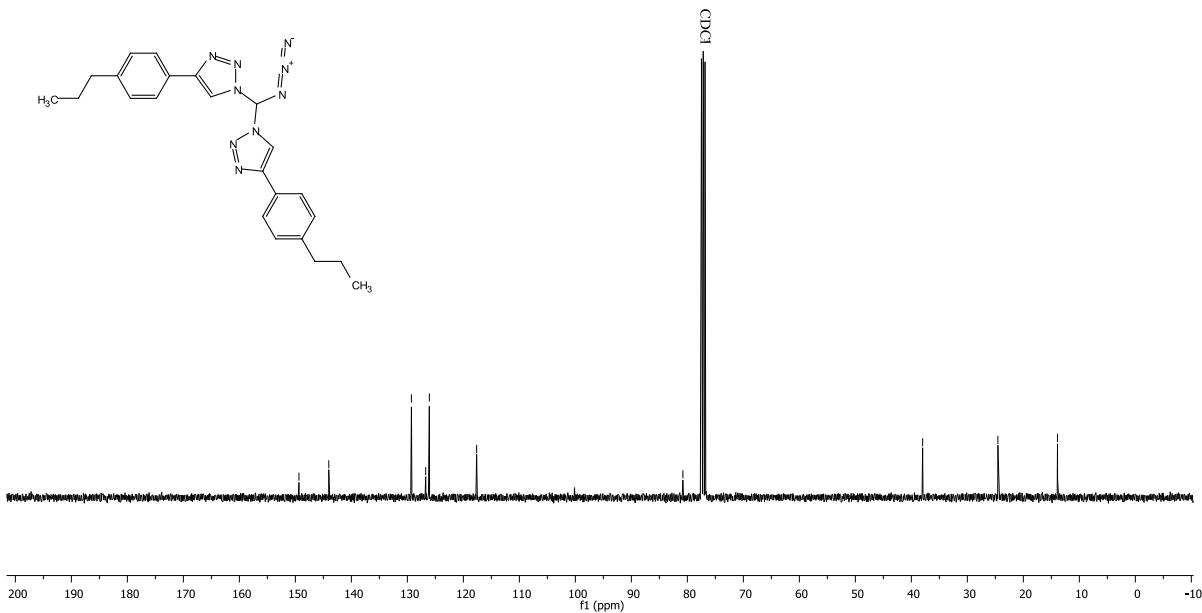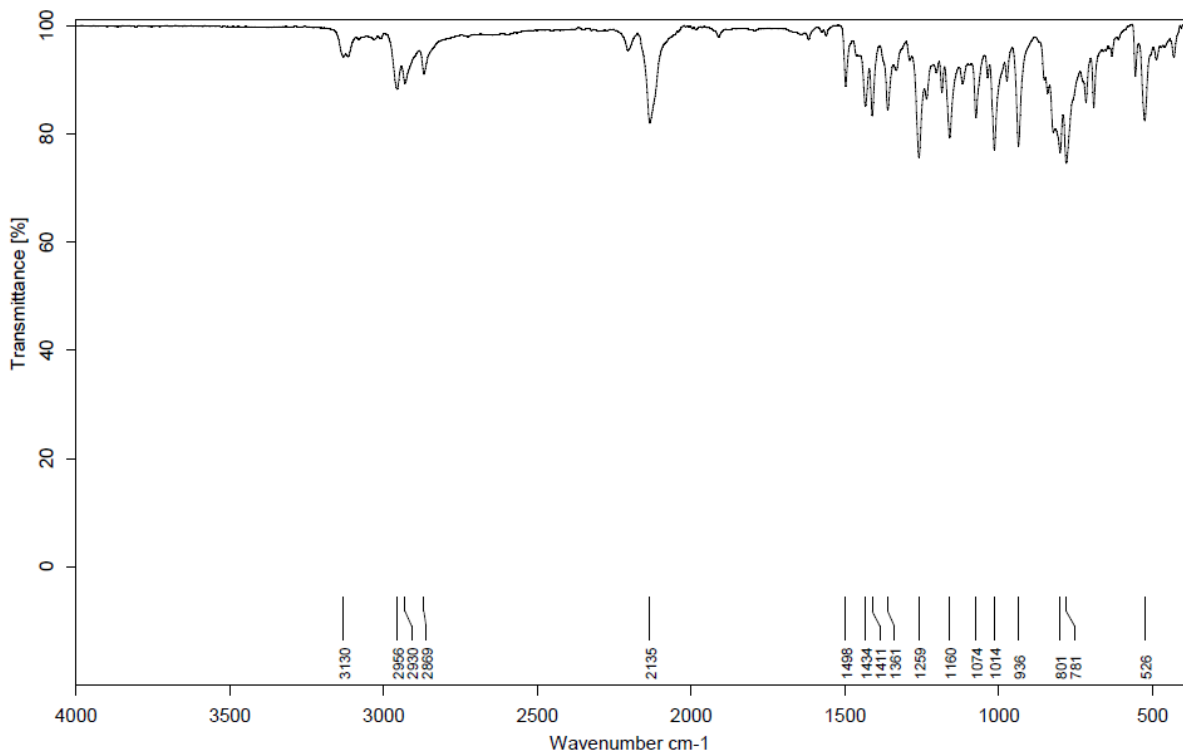

# 1,1'-(azidomethylene)bis(4-phenyl-1H-1,2,3-triazole) (3f)

<sup>1</sup>H NMR(400MHz CDCl<sub>3</sub>)

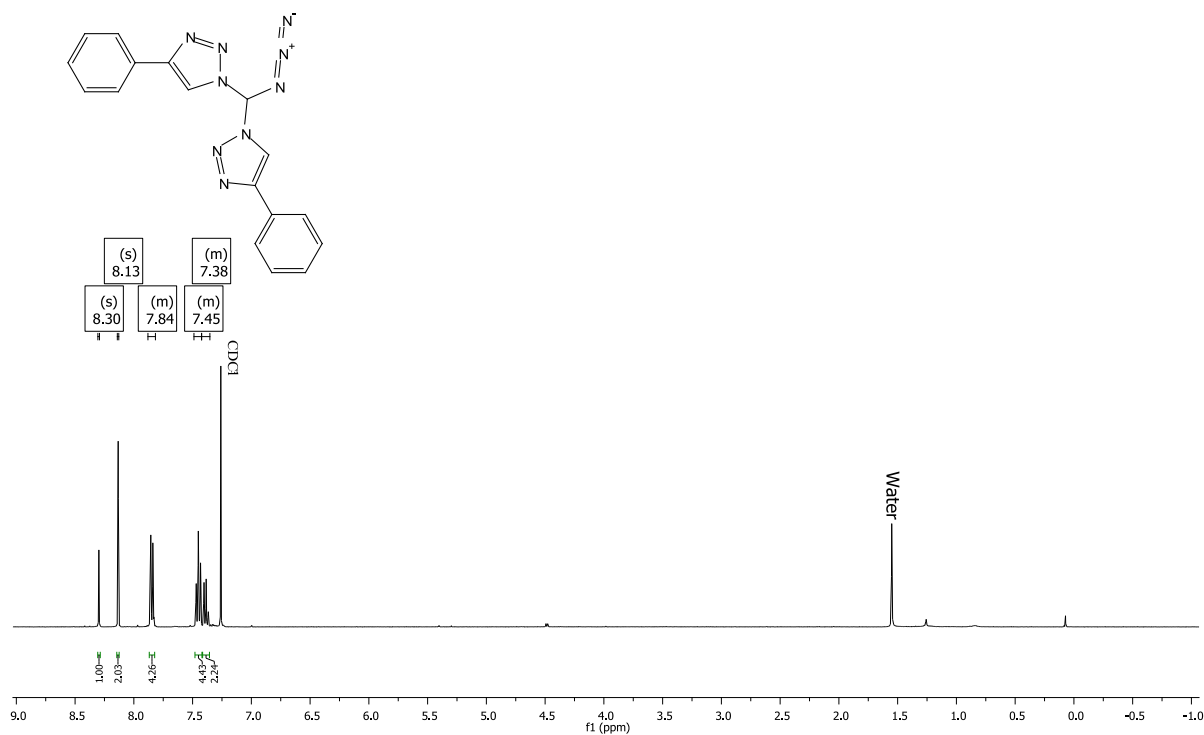

<sup>13</sup>C NMR(101MHz CDCl<sub>3</sub>)

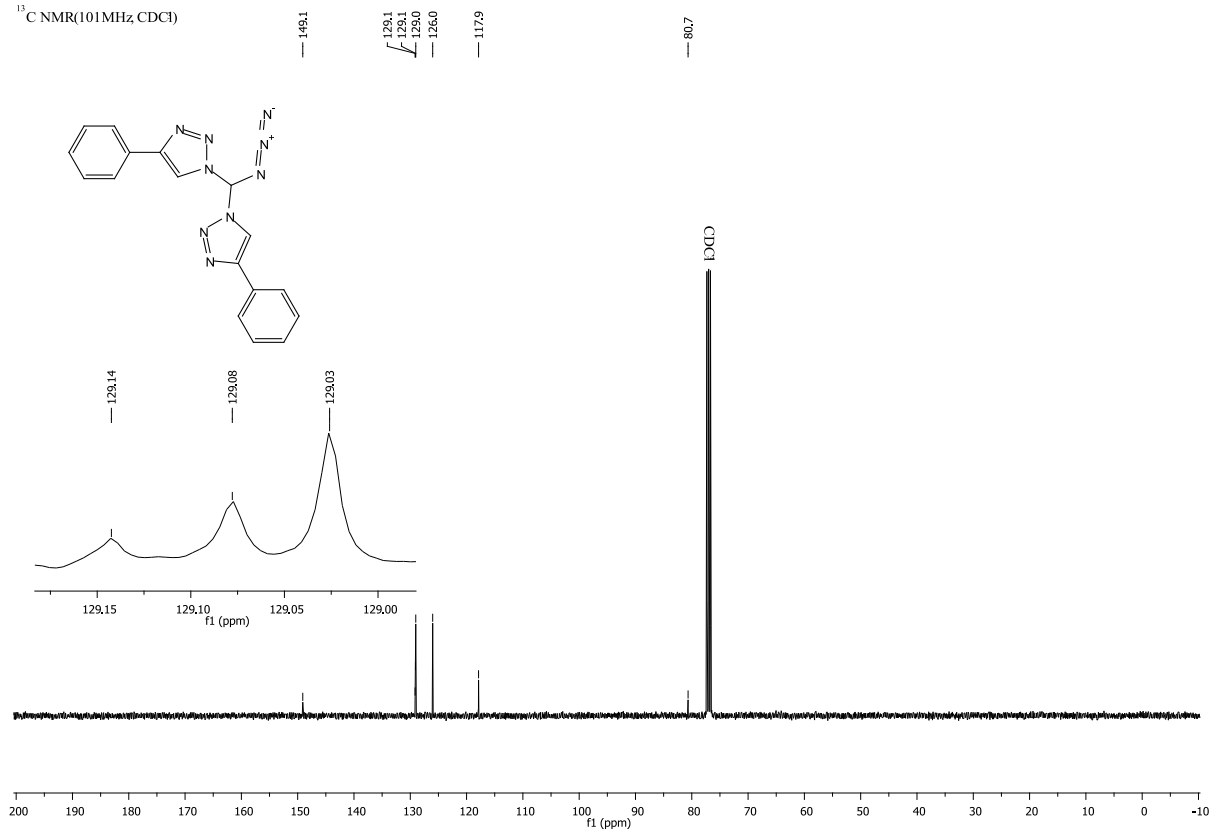

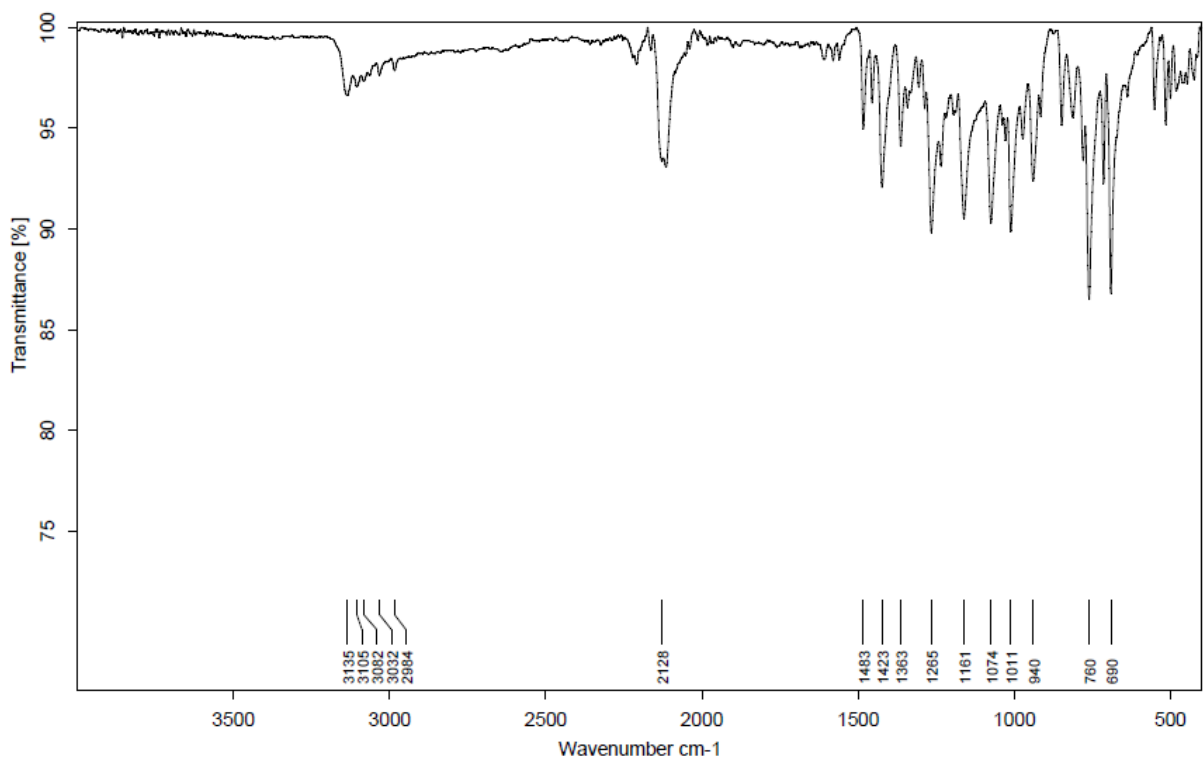

**trimethyl 1,1',1''-methanetriyltris(1H-1,2,3-triazole-4-carboxylate) (4a)**

<sup>1</sup>H NMR(400MHz DMSO)

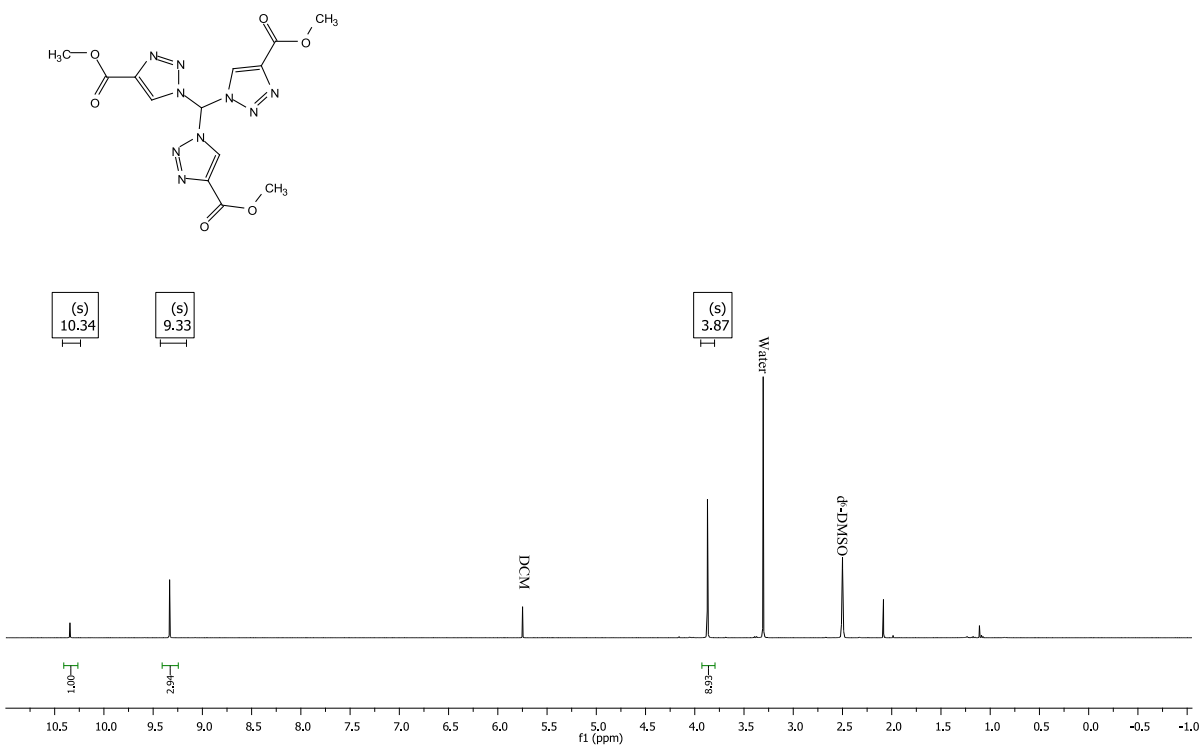

<sup>13</sup>C NMR(101MHz DMSO)

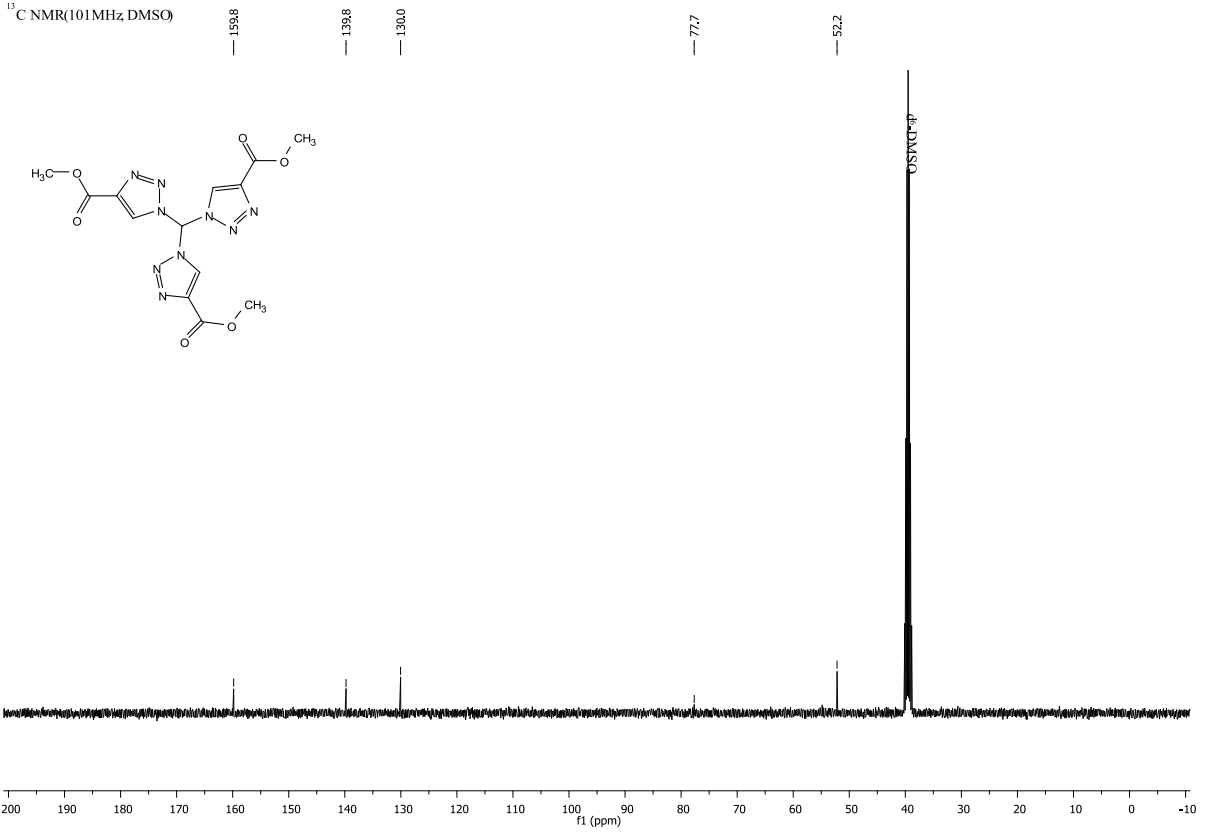

<sup>15</sup>N NMR(61 MHz DMSO)

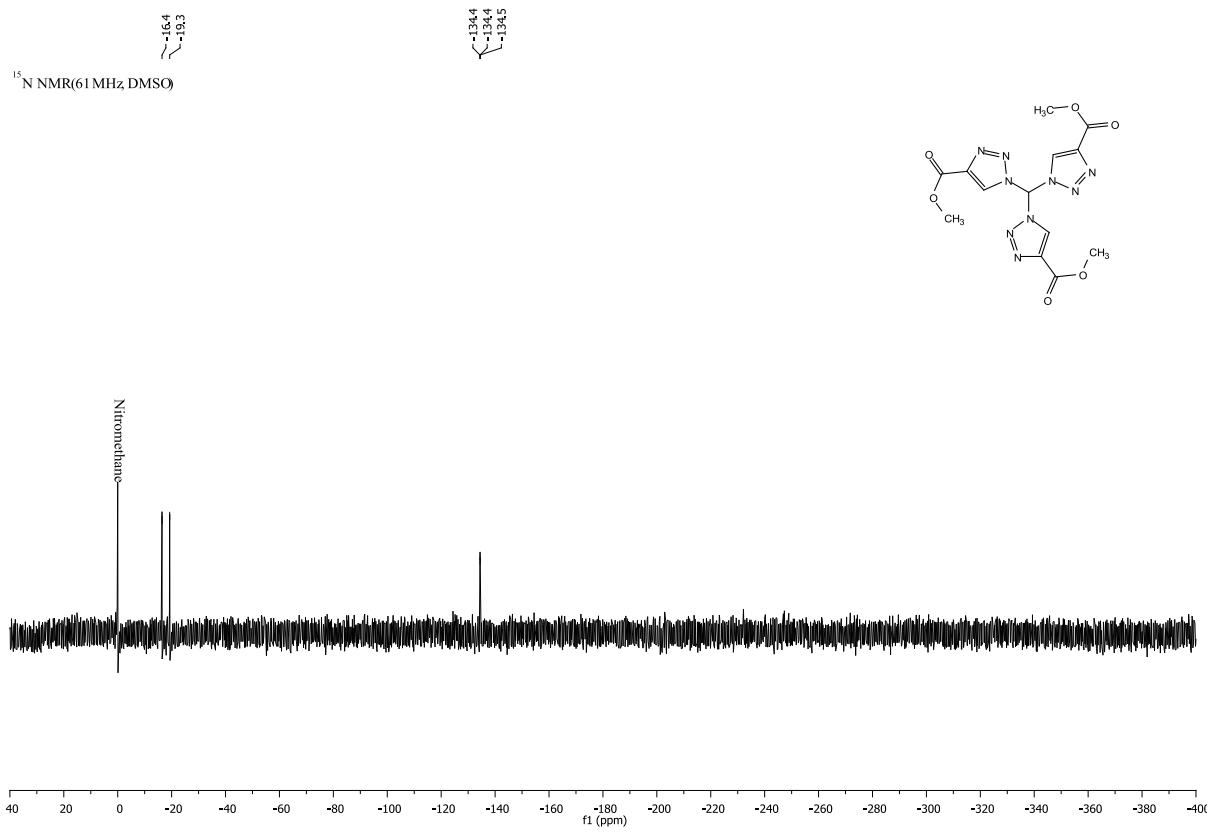

$^1\text{H}$ - $^{15}\text{N}$ -NMR HMBC

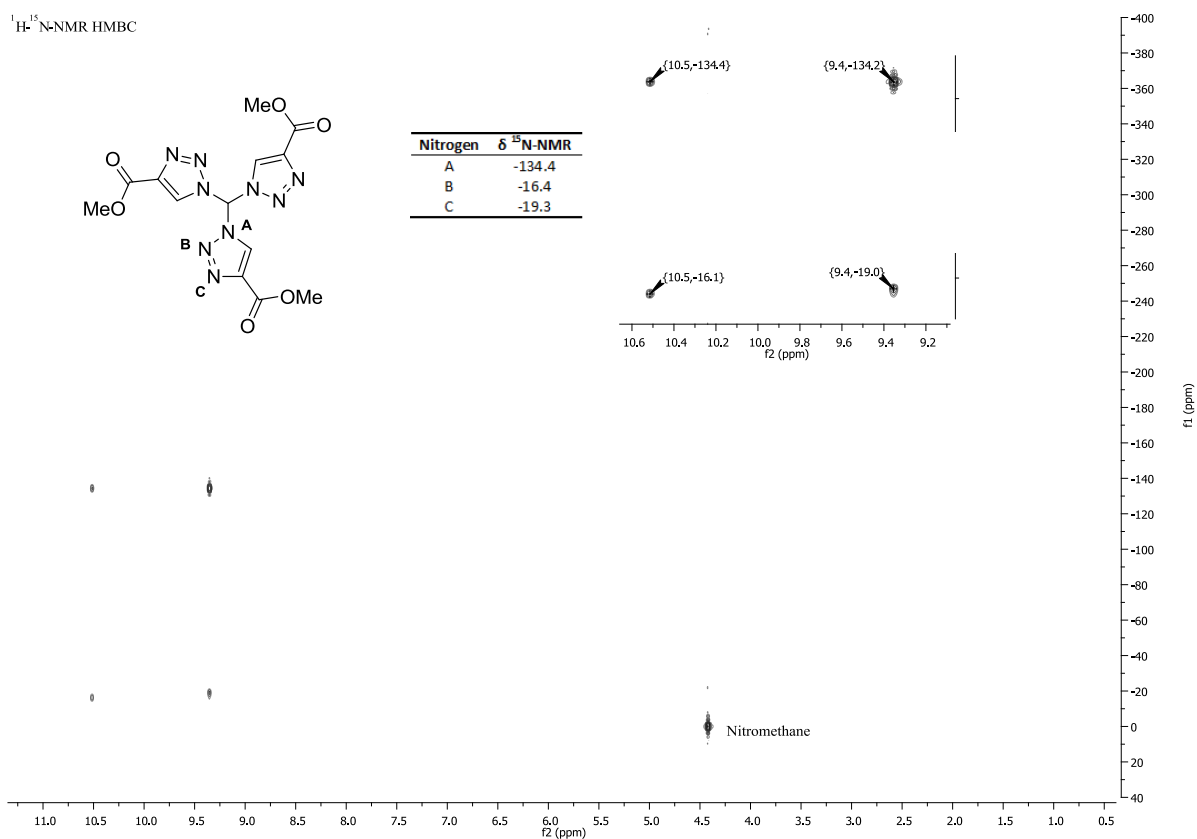

### tribenzyl 1,1',1''-methanetriyltris(1H-1,2,3-triazole-4-carboxylate) (4b)

$^1\text{H}$  NMR(400MHz CDCl<sub>3</sub>)

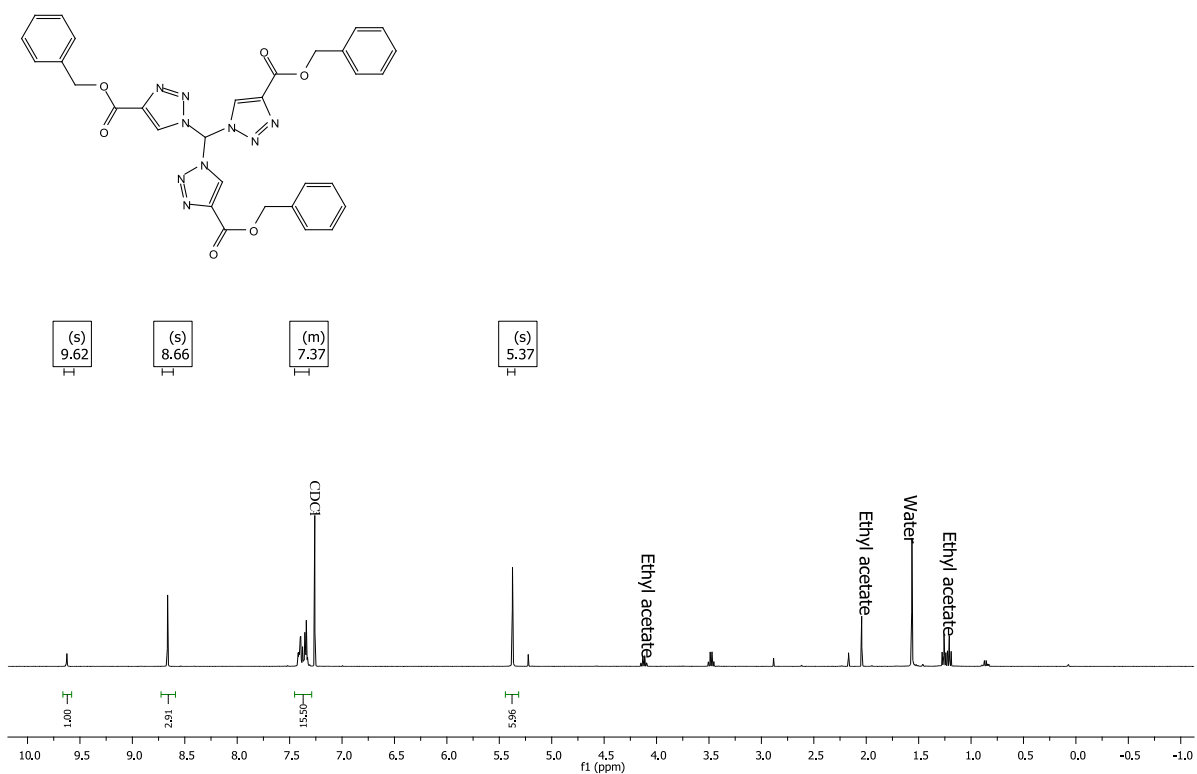

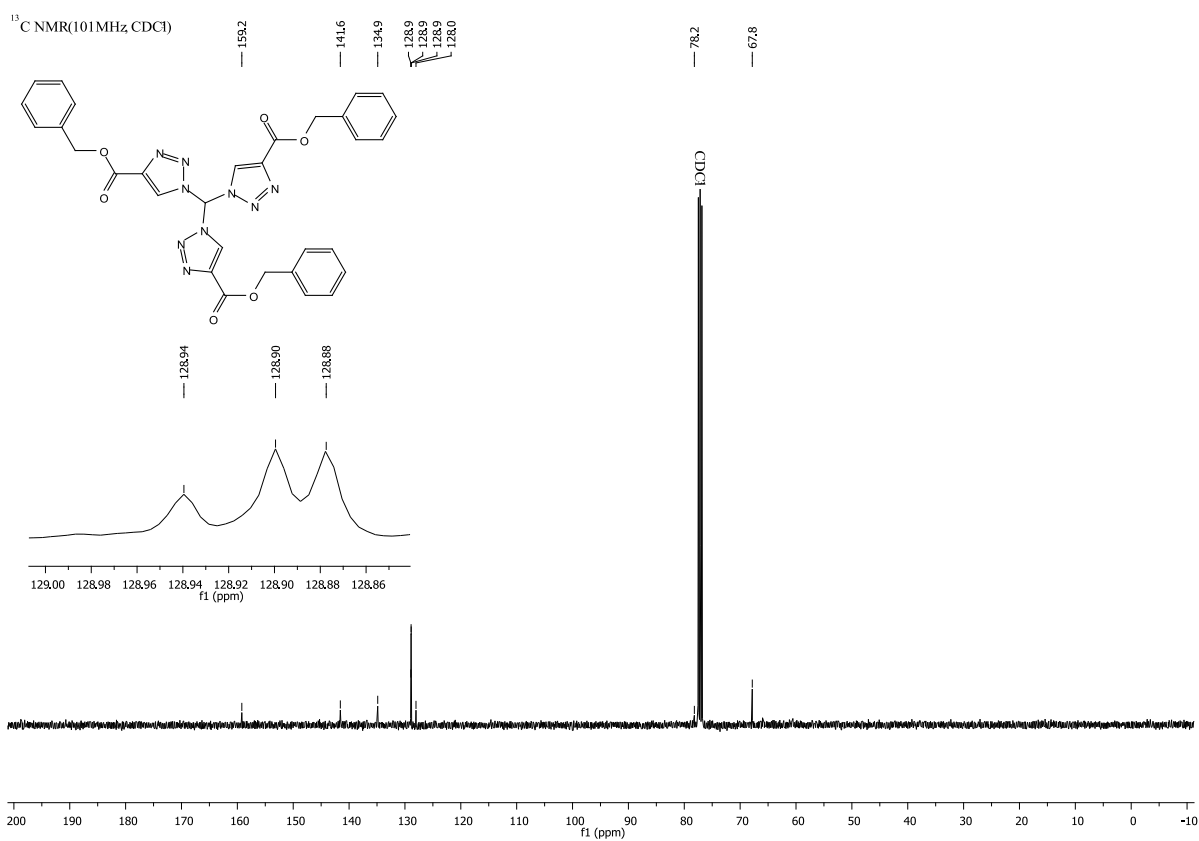

### tris(4-cyclopropyl-1H-1,2,3-triazol-1-yl)methane (4c)

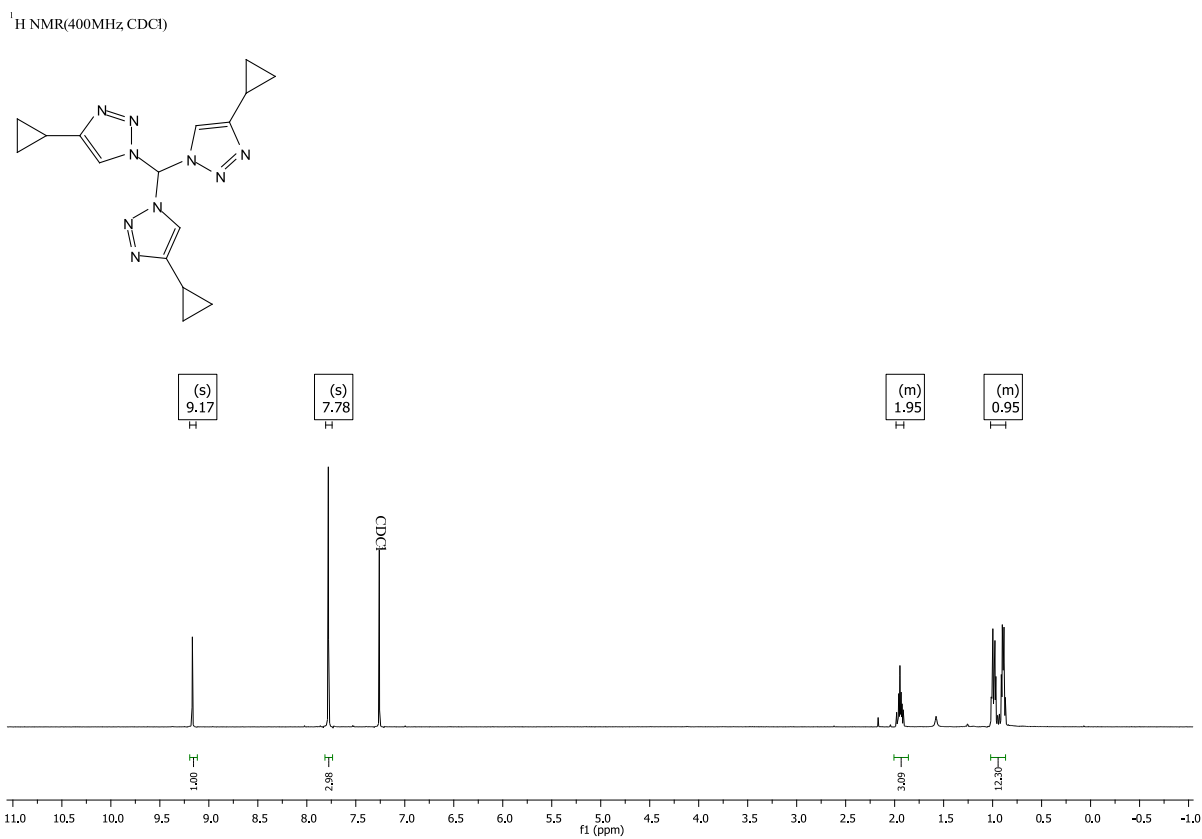

<sup>13</sup>C NMR(101MHz CDCl<sub>3</sub>)

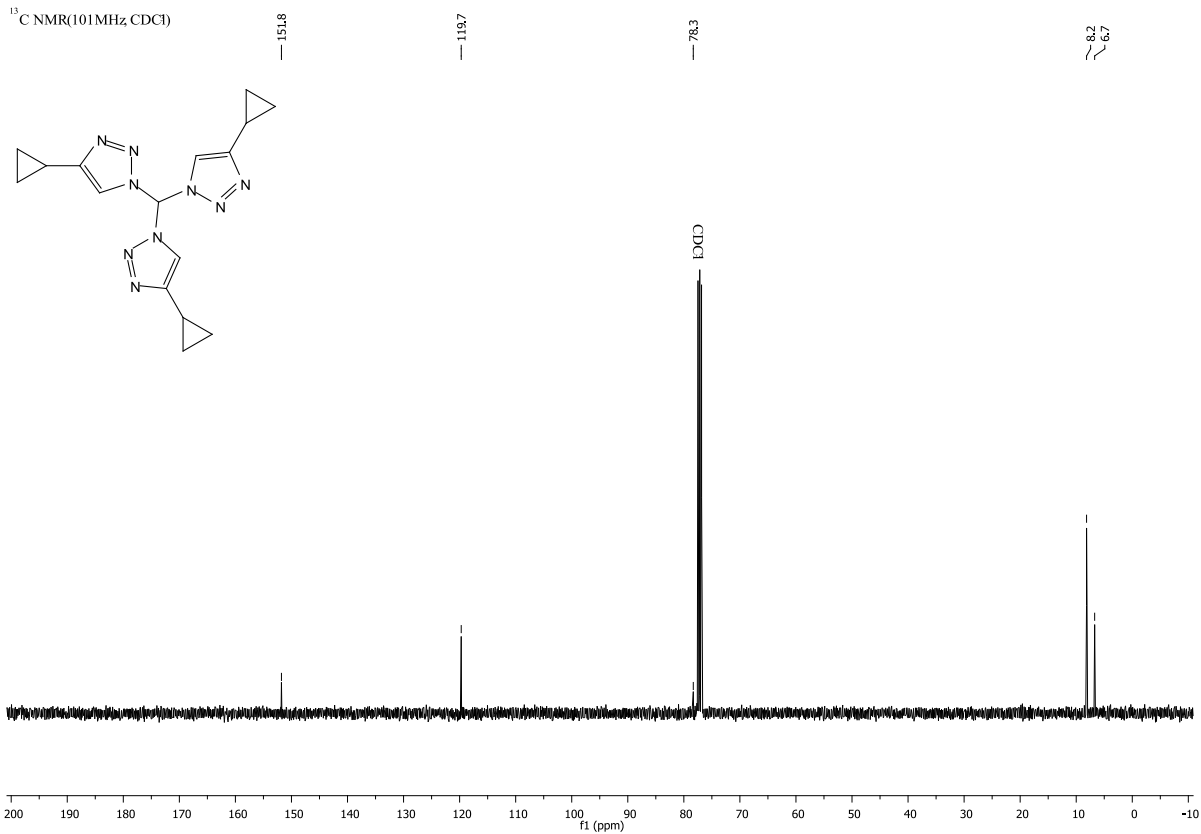

### tris(4-(4-propylphenyl)-1H-1,2,3-triazol-1-yl)methane (4d)

<sup>1</sup>H NMR(400MHz CDCl<sub>3</sub>)

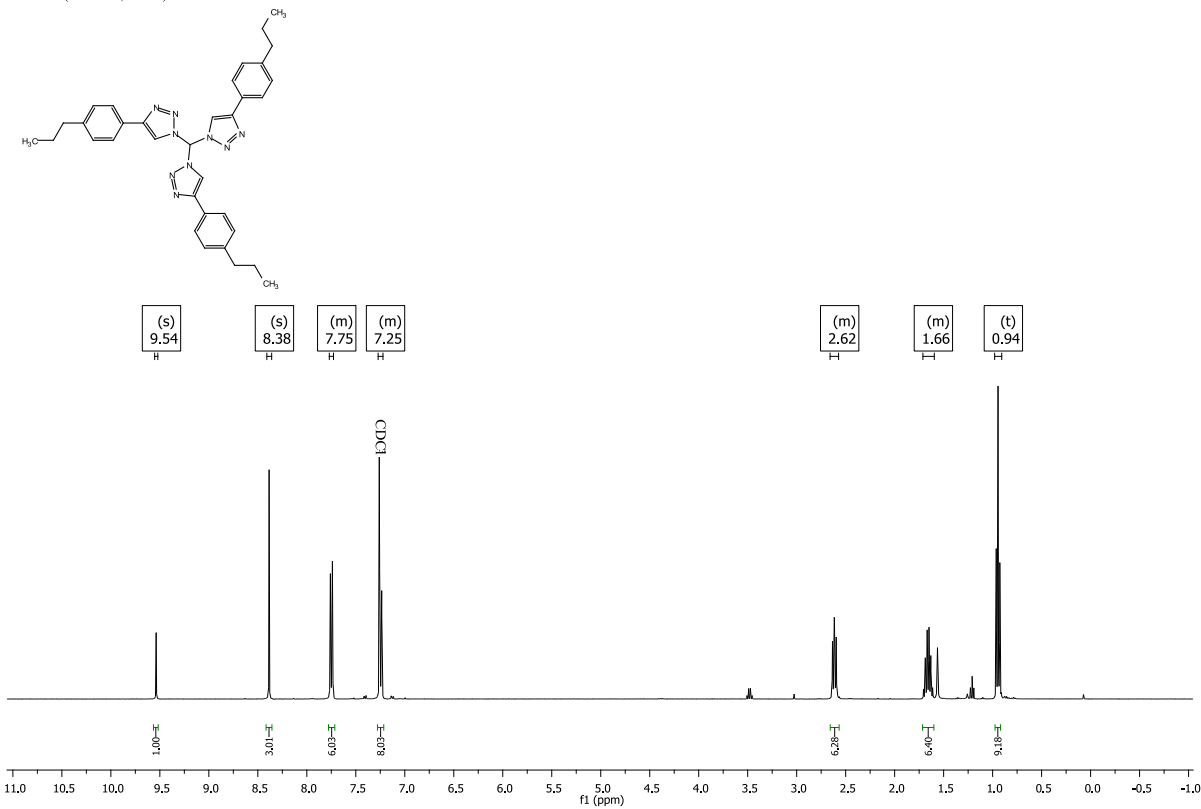

<sup>13</sup>C NMR(101MHz CDCl<sub>3</sub>)

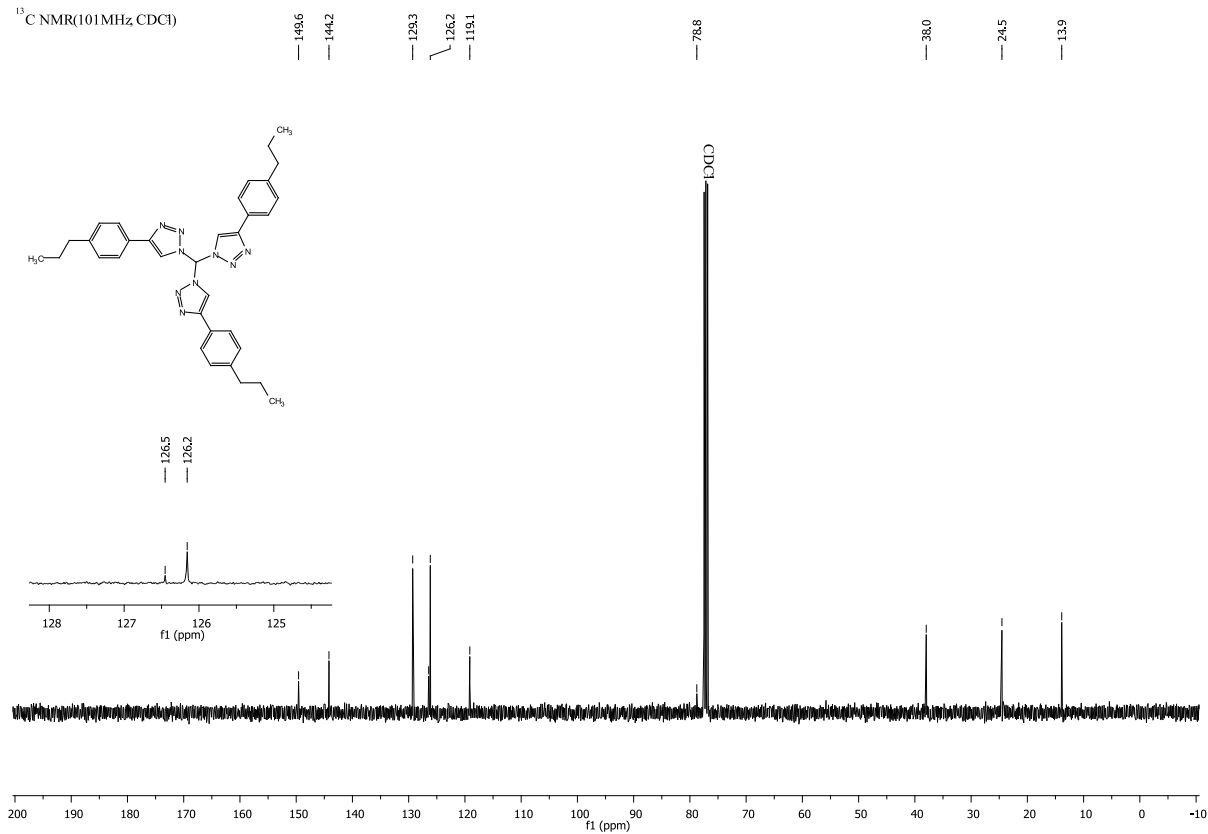

### tris(4-phenyl-1H-1,2,3-triazol-1-yl)methane (4e)

<sup>1</sup>H NMR(400MHz CDCl<sub>3</sub>)

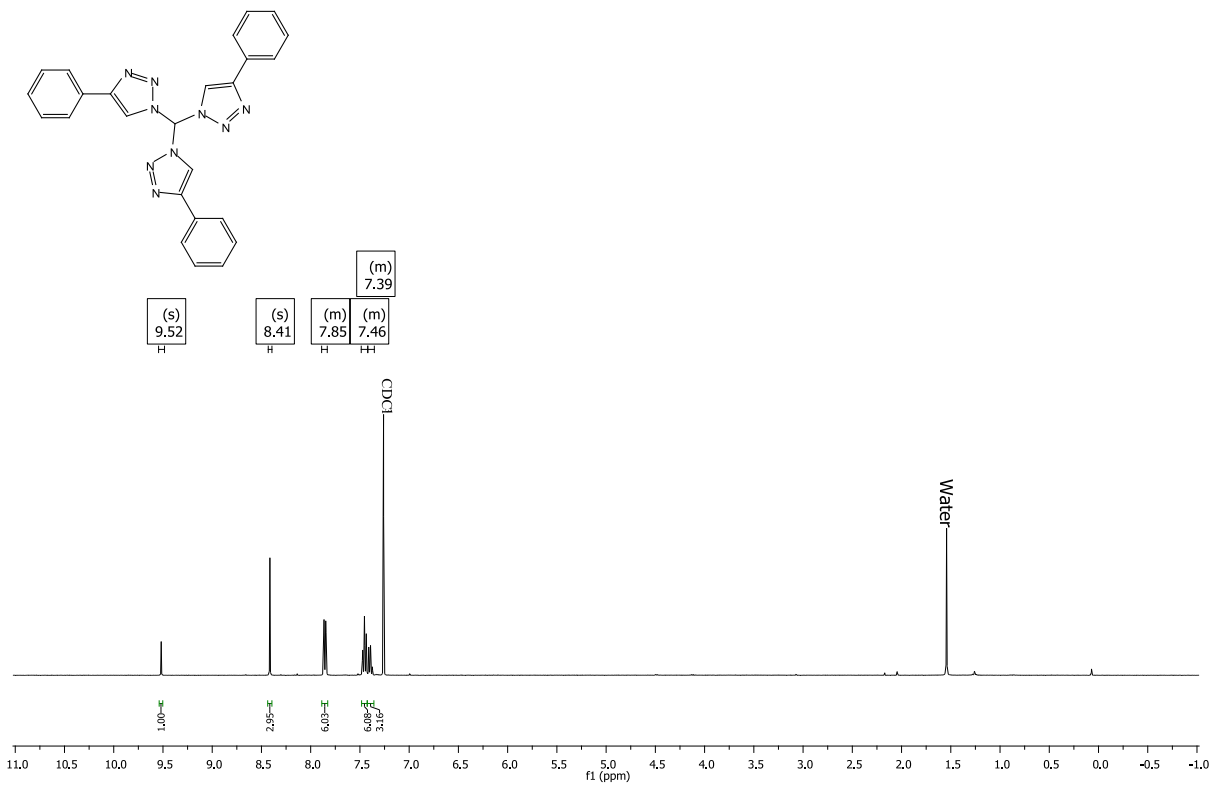



<sup>13</sup>C NMR(101MHz CDCl<sub>3</sub>)

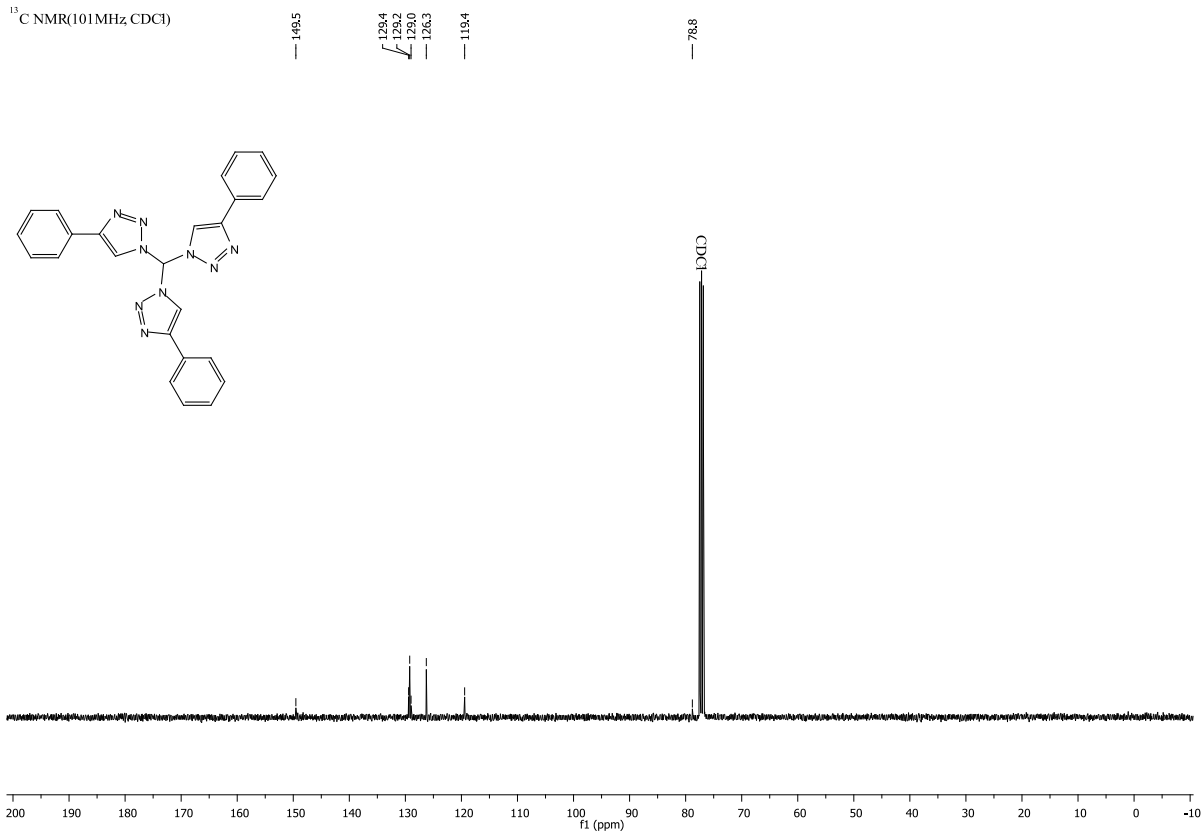

**dimethyl 1,1'-((4-((benzyloxy)carbonyl)-1H-1,2,3-triazol-1-yl)methylene)bis(1H-1,2,3-triazole-4-carboxylate) (4f)**

<sup>1</sup>H NMR(400MHz DMSO)

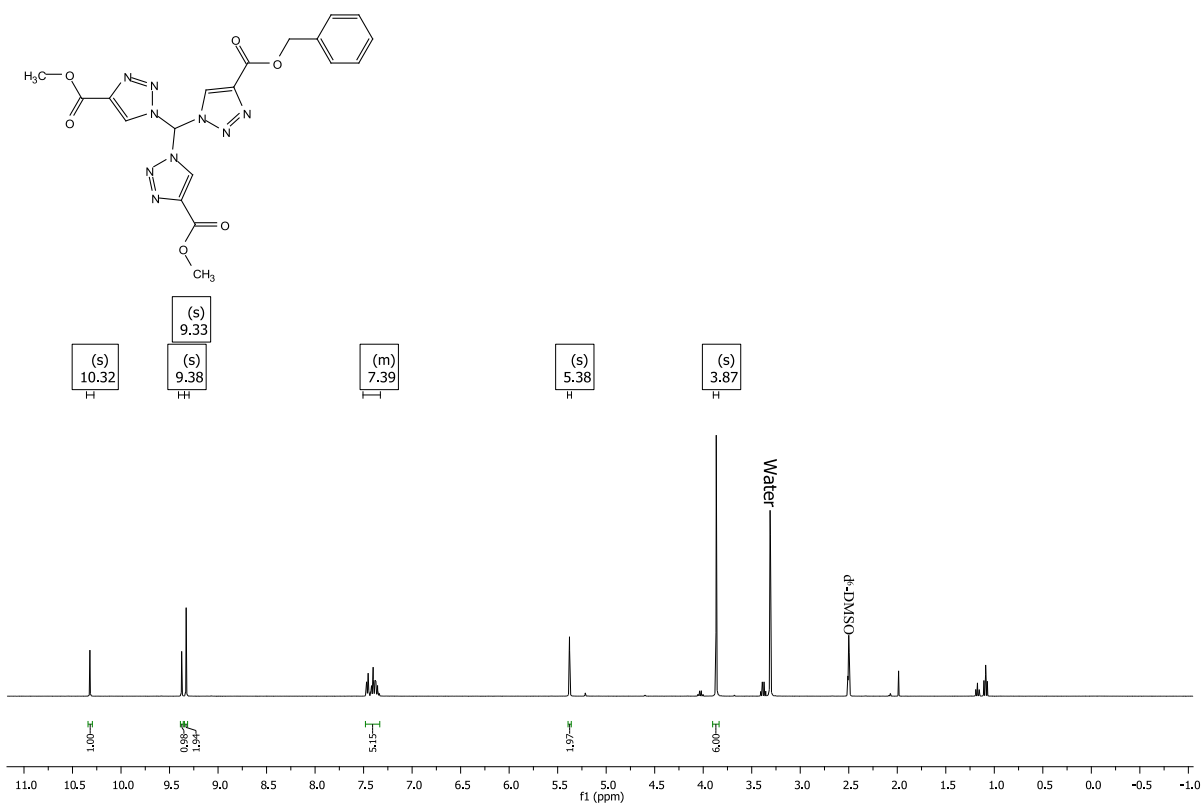

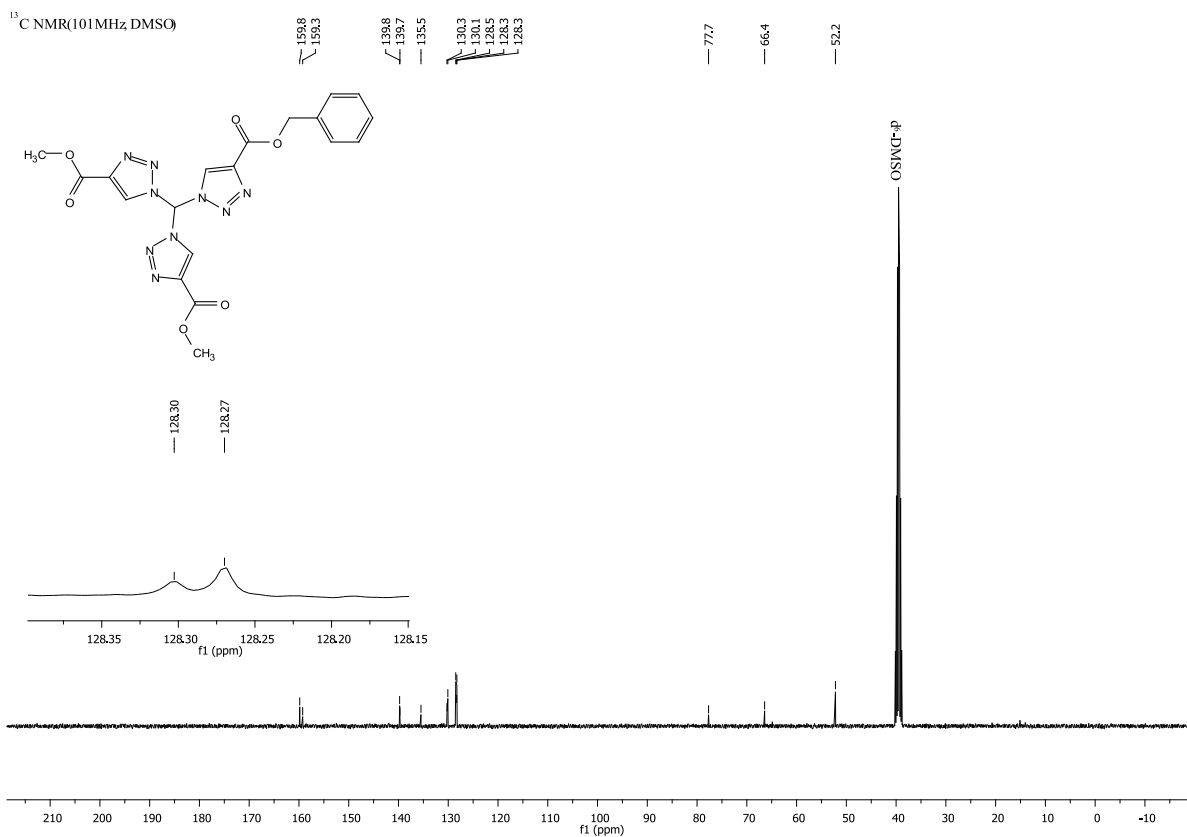

**dimethyl 1,1'-((4-cyclopropyl-1H-1,2,3-triazol-1-yl)methylene)bis(1H-1,2,3-triazole-4-carboxylate) (4g)**

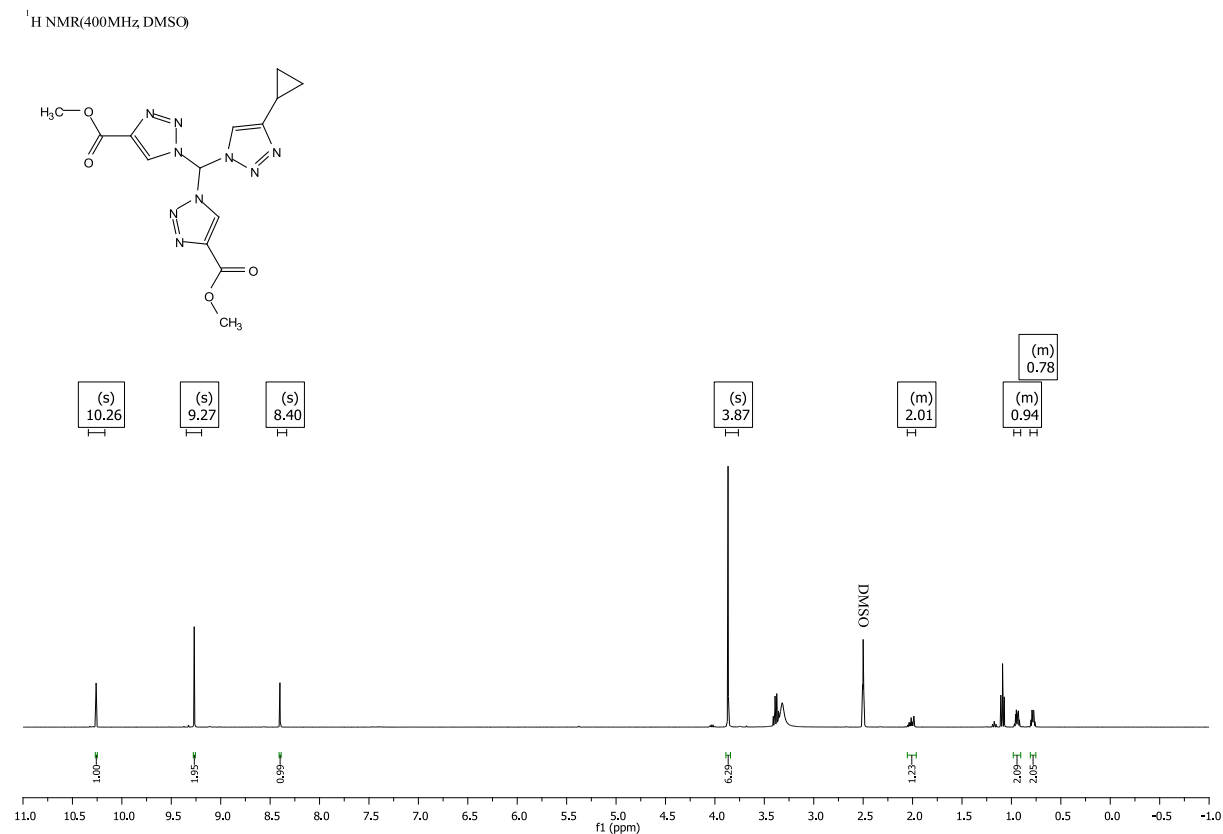

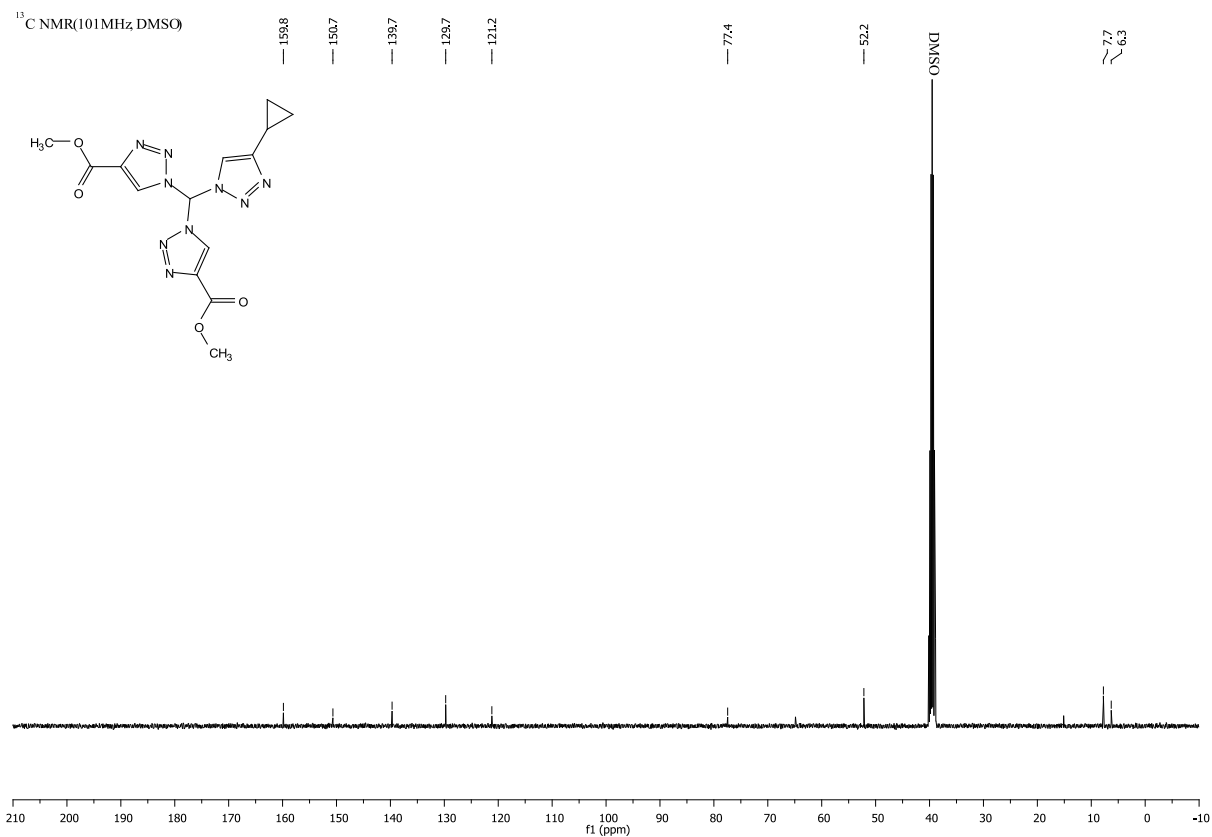

**dimethyl 1,1'-((4-phenyl-1H-1,2,3-triazol-1-yl)methylene)bis(1H-1,2,3-triazole-4-carboxylate)**  
**(4h)**

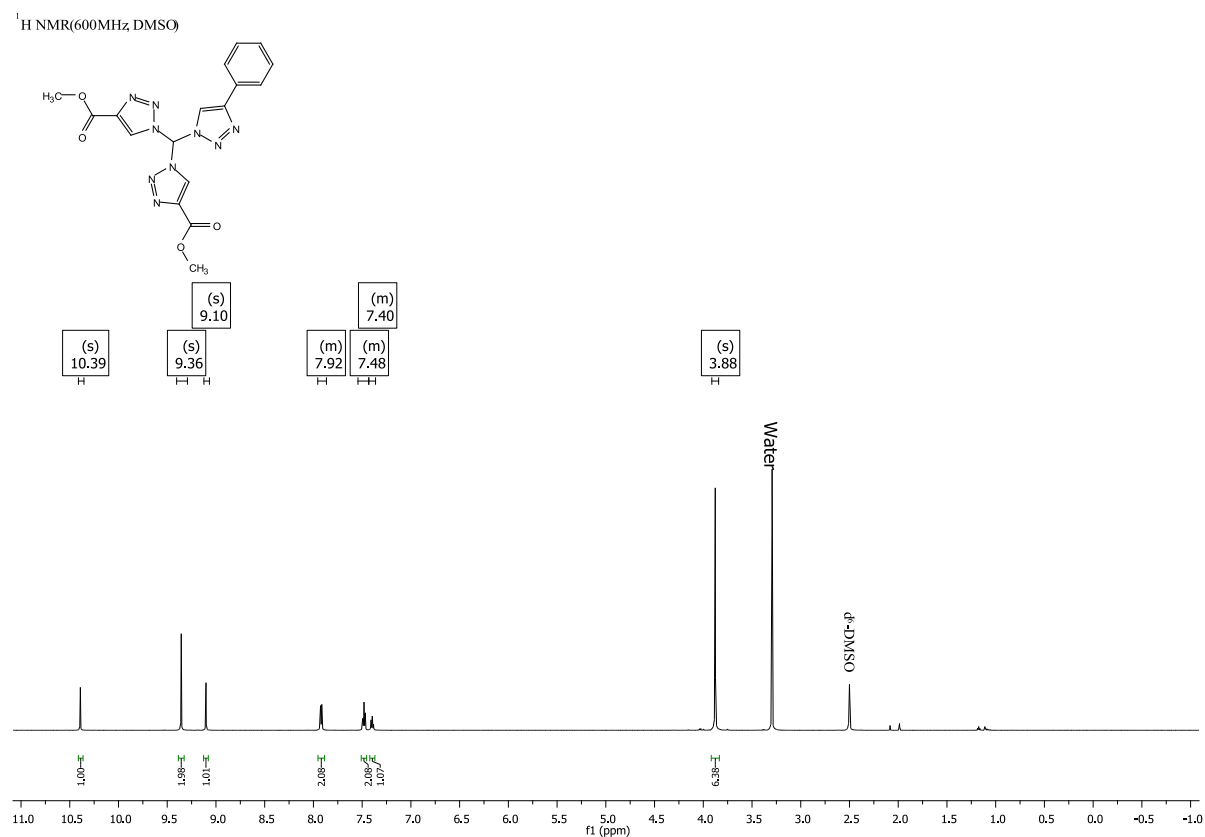

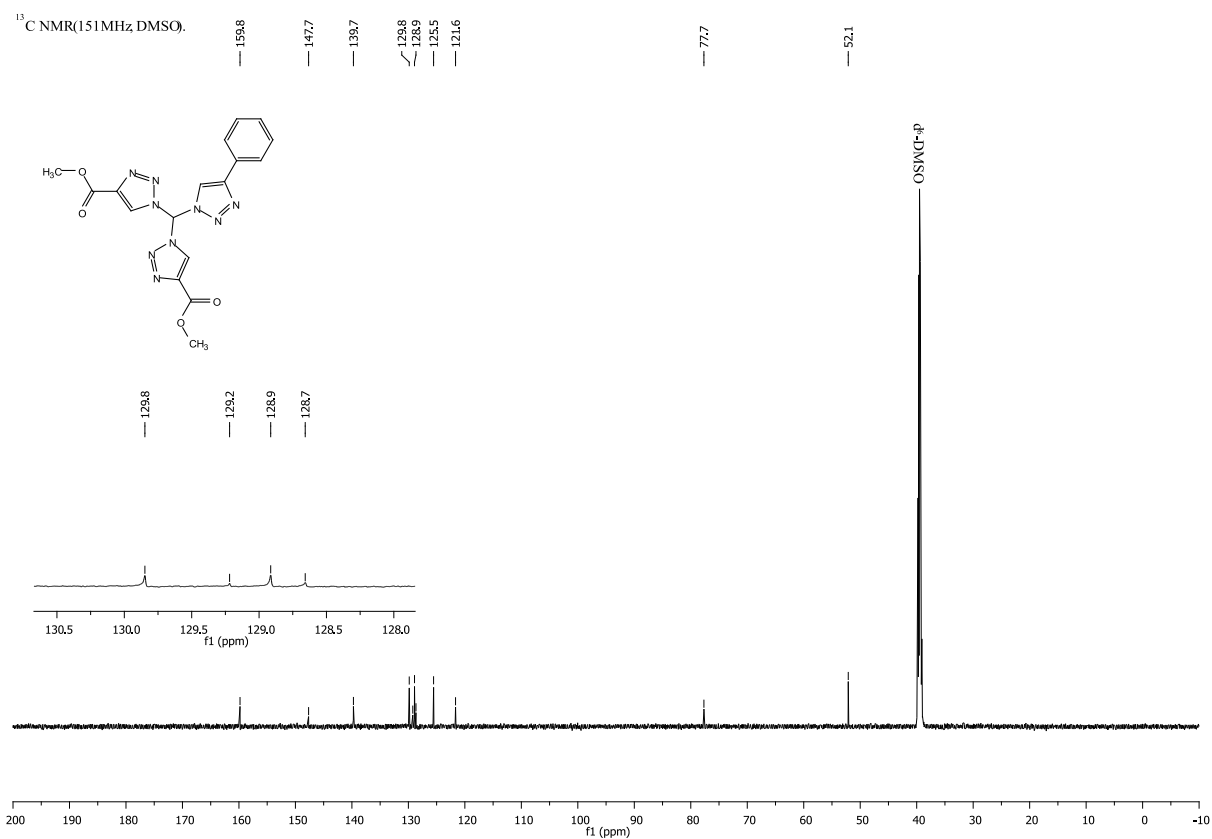

hexamethyl 1,1',1'',1''',1''''',1''''''-((4,4',4''-(nitrilotris(methylene))tris(1*H*-1,2,3-triazole-4,1-diyl))tris(methanetriyl))hexakis(1*H*-1,2,3-triazole-4-carboxylate) (5)

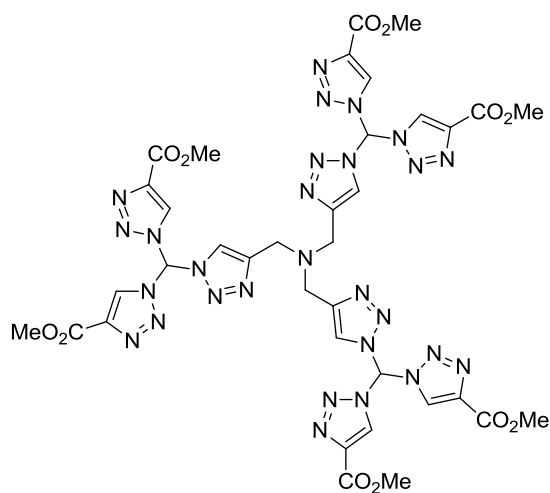

<sup>1</sup>H NMR(600MHz DMSO)

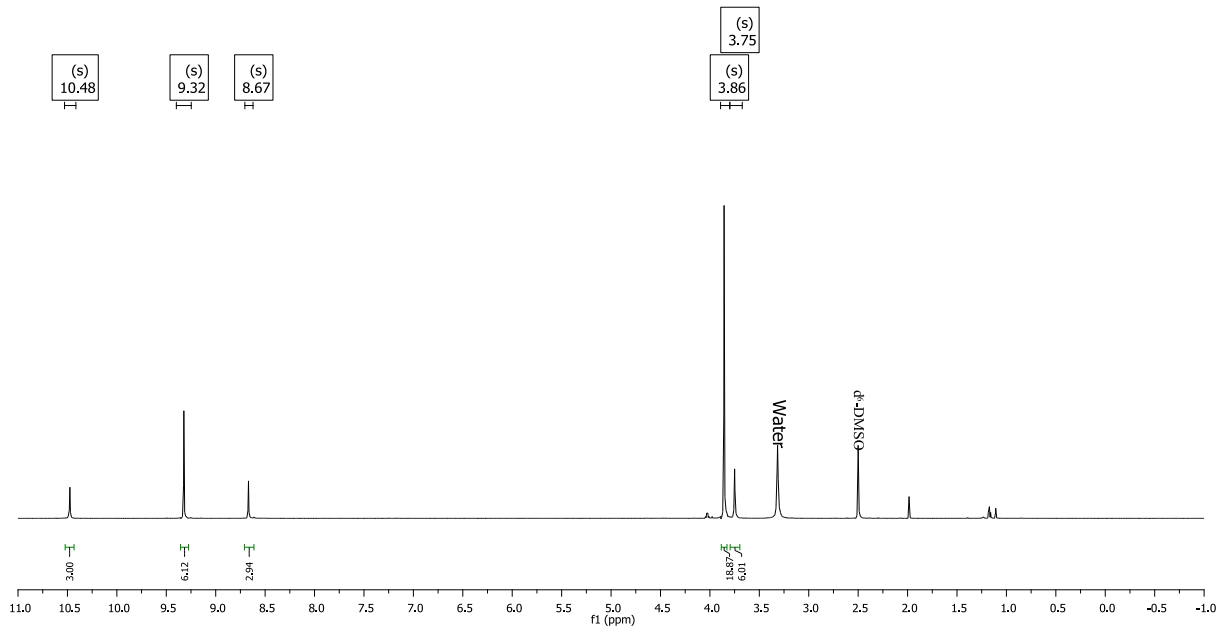

<sup>13</sup>C NMR(151MHz DMSO)

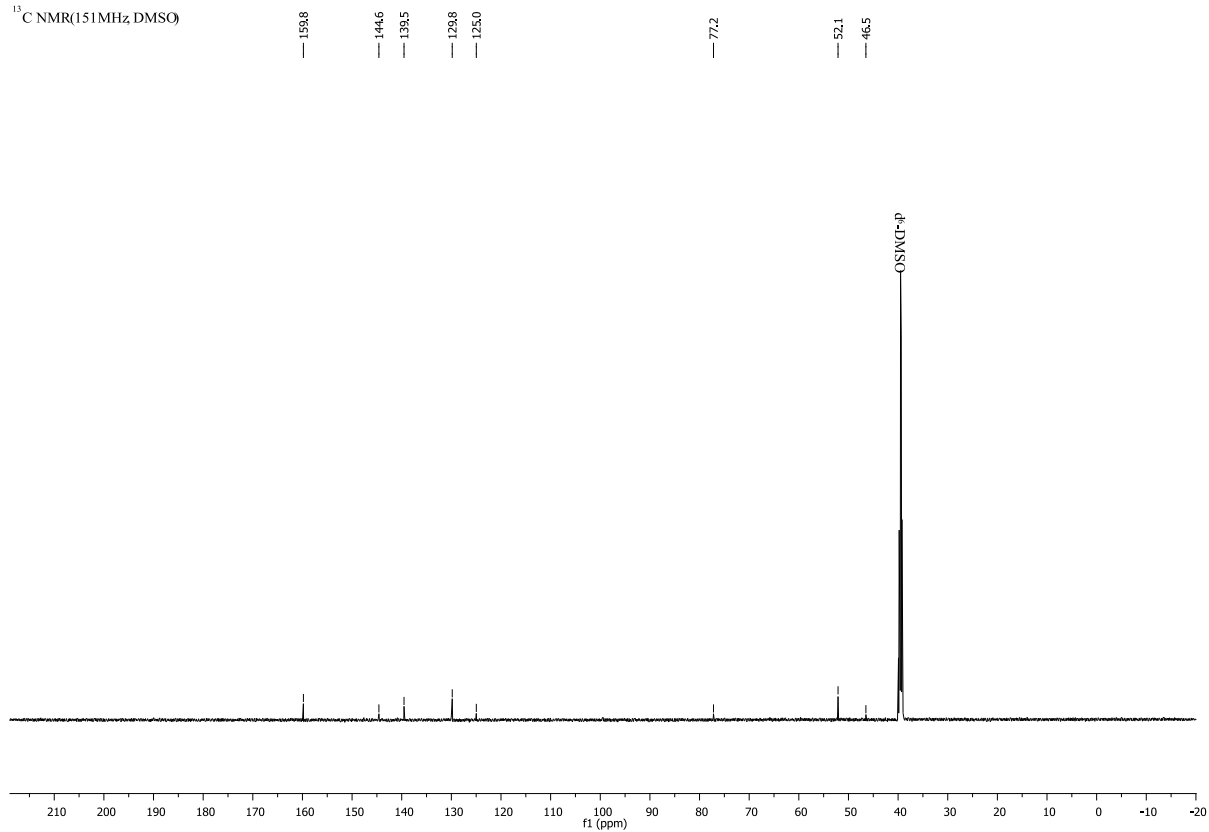

**rac ethyl 2-azido-2-(4-tosyl-1H-1,2,3-triazol-1-yl)acetate (7)**

<sup>1</sup>H NMR(400MHz CDCl<sub>3</sub>)

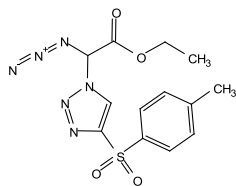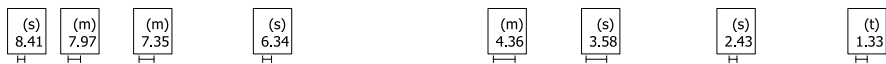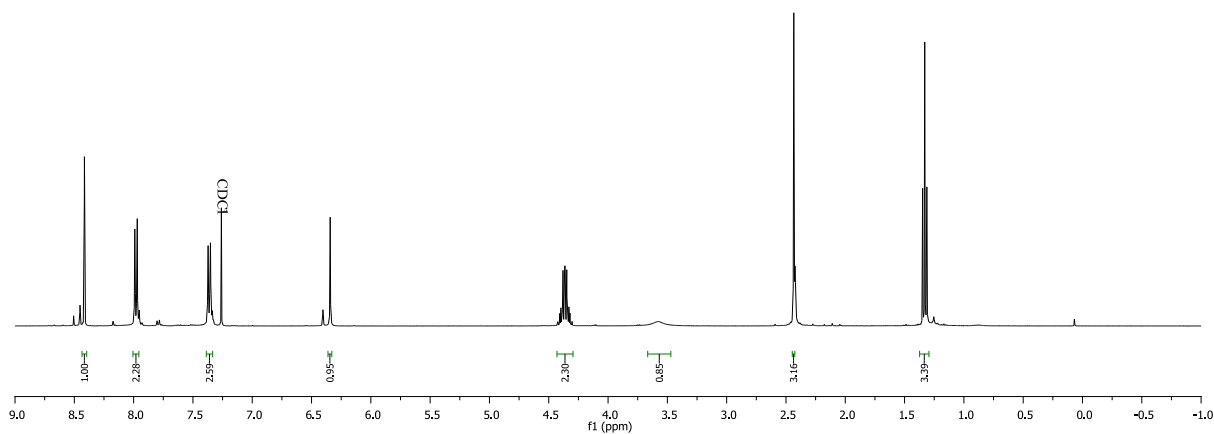

<sup>13</sup>C NMR(101MHz CDCl<sub>3</sub>)

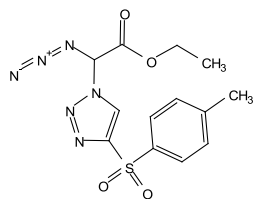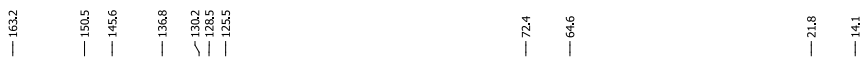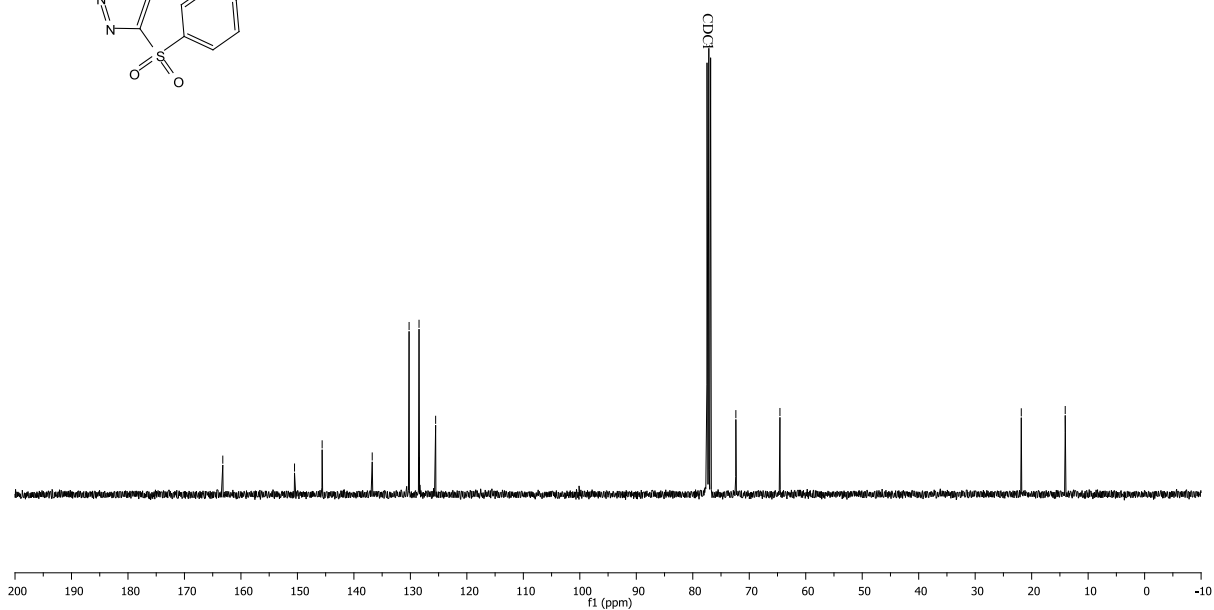

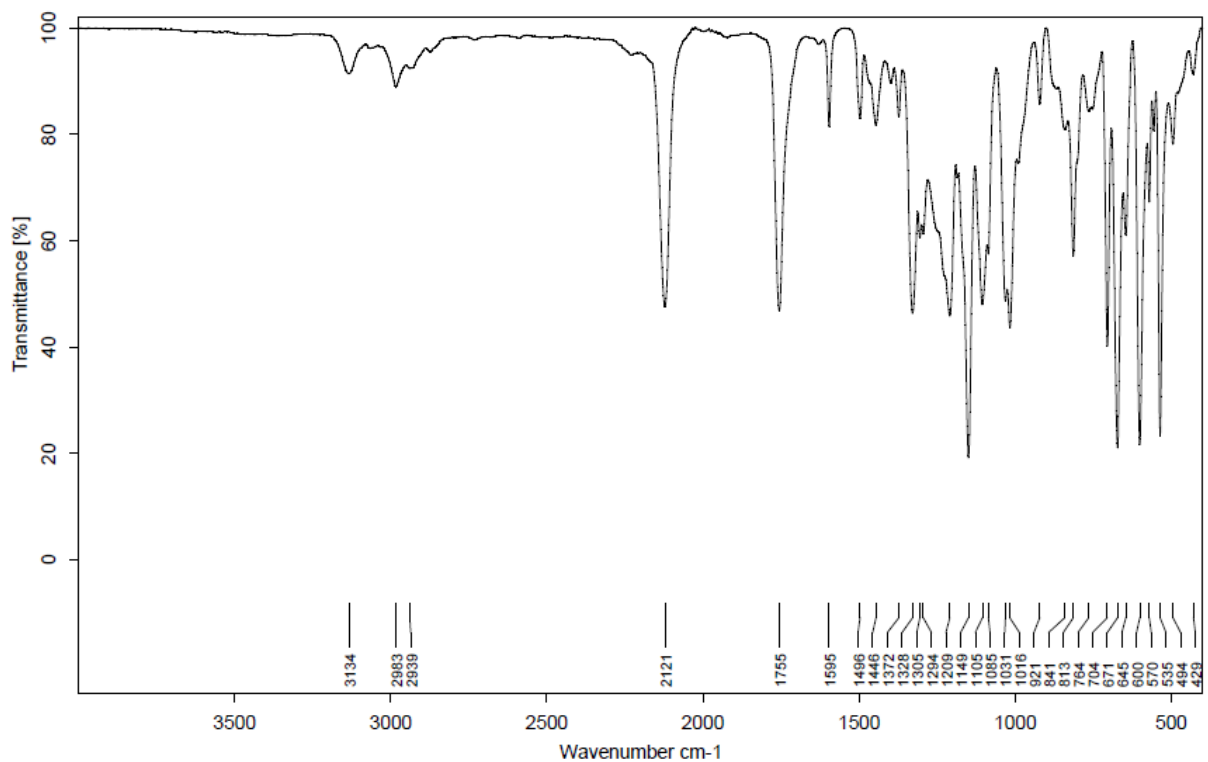

***rac* methyl 1-(2-ethoxy-2-oxo-1-(4-tosyl-1H-1,2,3-triazol-1-yl)ethyl)-1H-1,2,3-triazole-4-carboxylate (8)**

<sup>1</sup>H NMR(600MHz CDCl<sub>3</sub>)

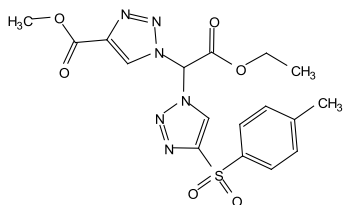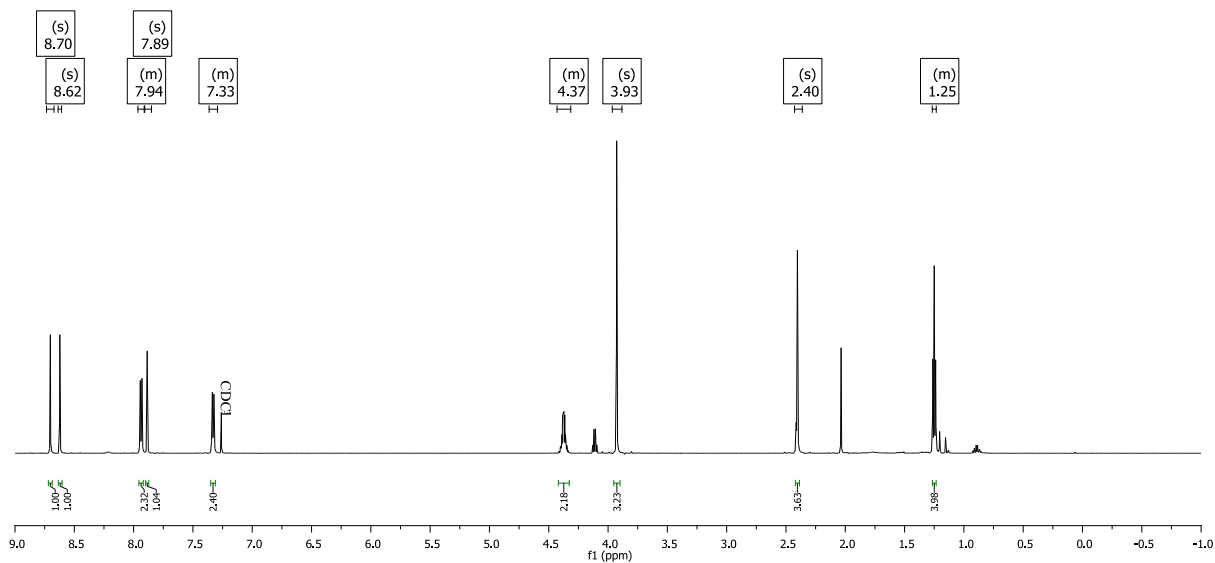

<sup>13</sup>C NMR(151MHz CDCl<sub>3</sub>)

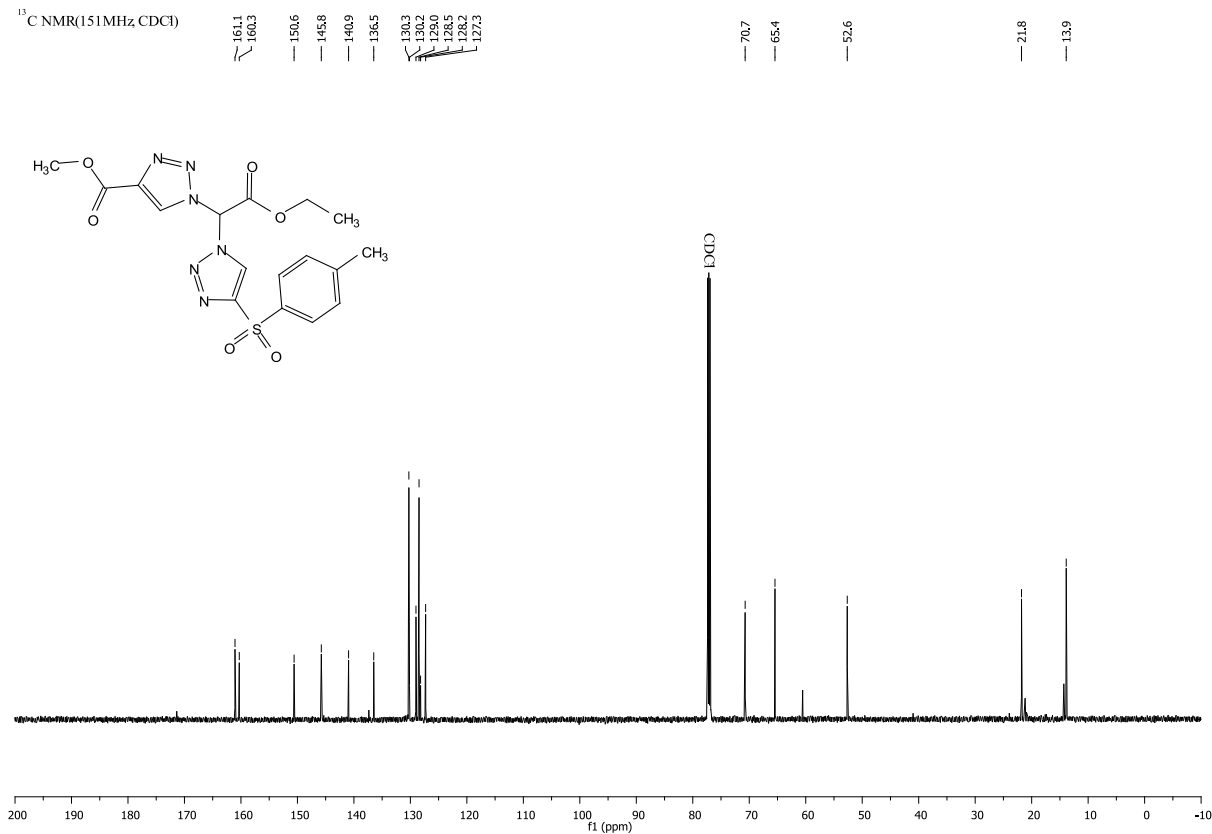

***rac* methyl 1-(azido(4-tosyl-1H-1,2,3-triazol-1-yl)methyl)-1H-1,2,3-triazole-4-carboxylate (9)**

<sup>1</sup>H NMR(400MHz DMSO)

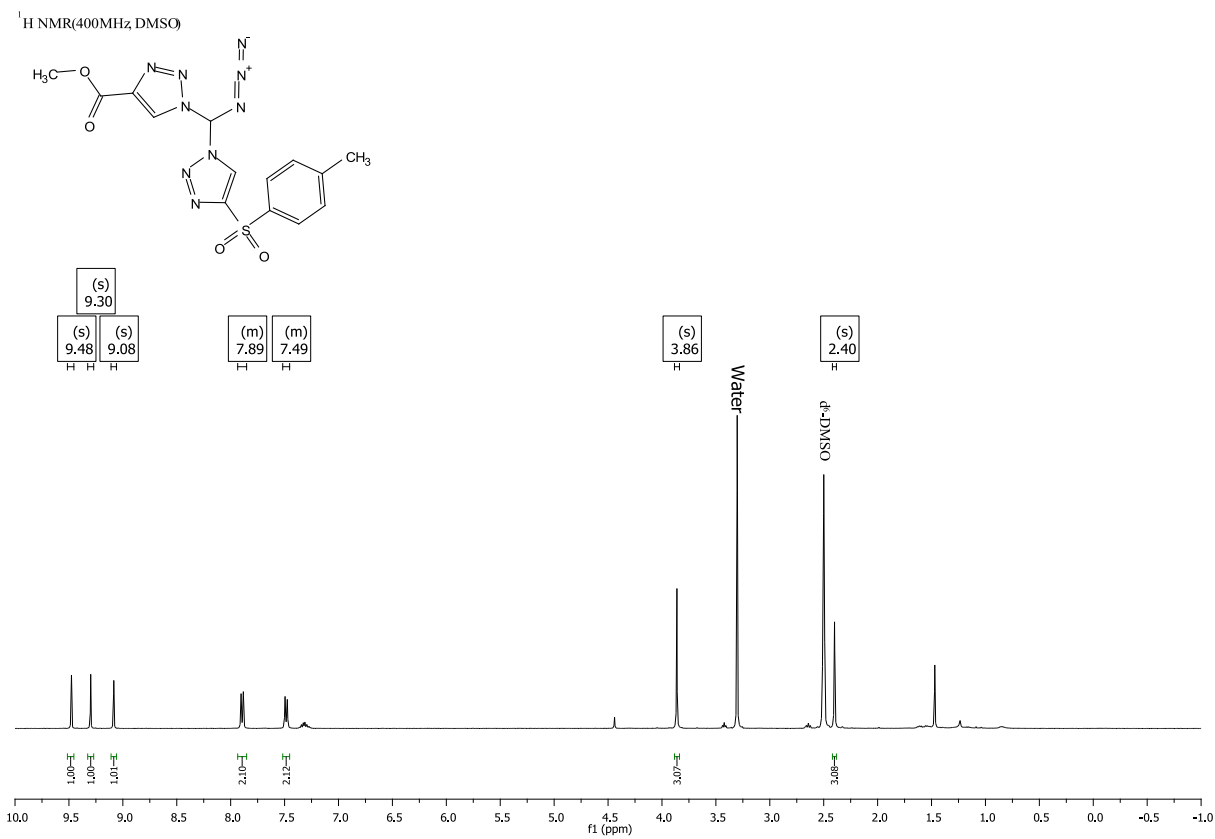



<sup>13</sup>C NMR(101MHz DMSO)

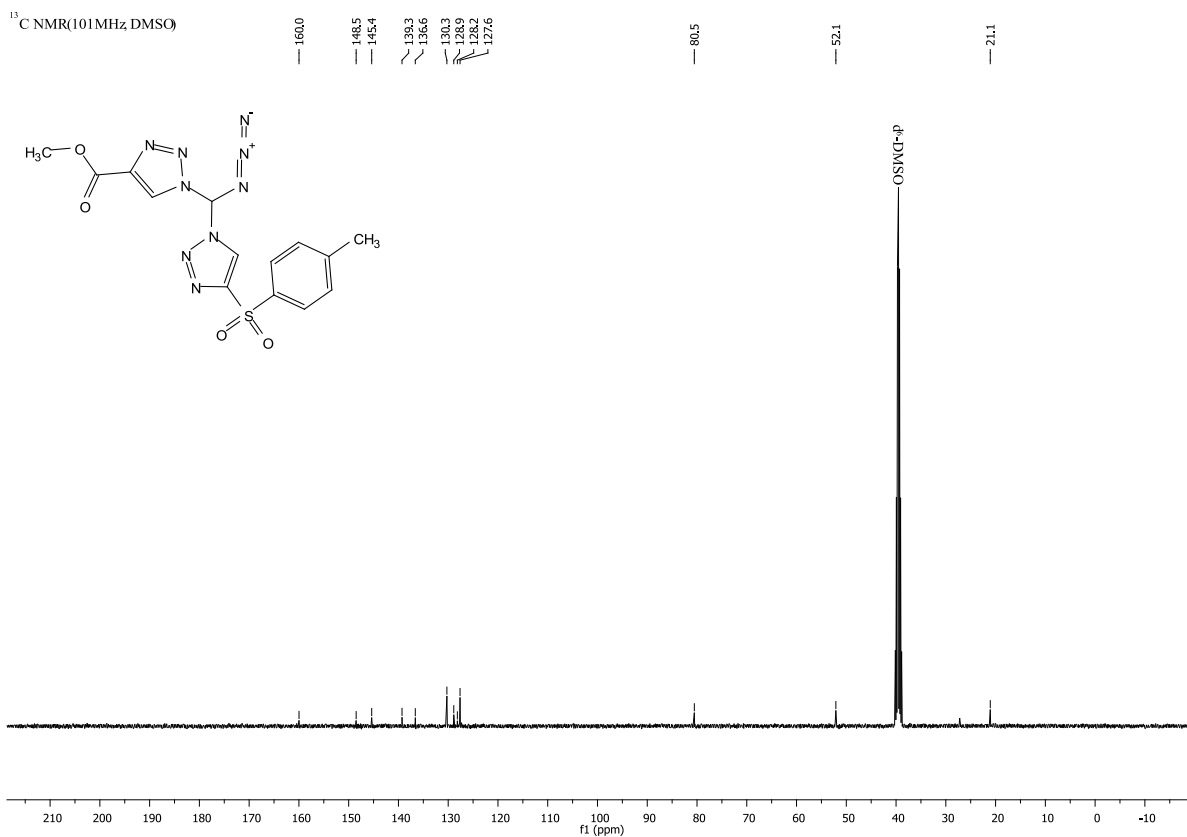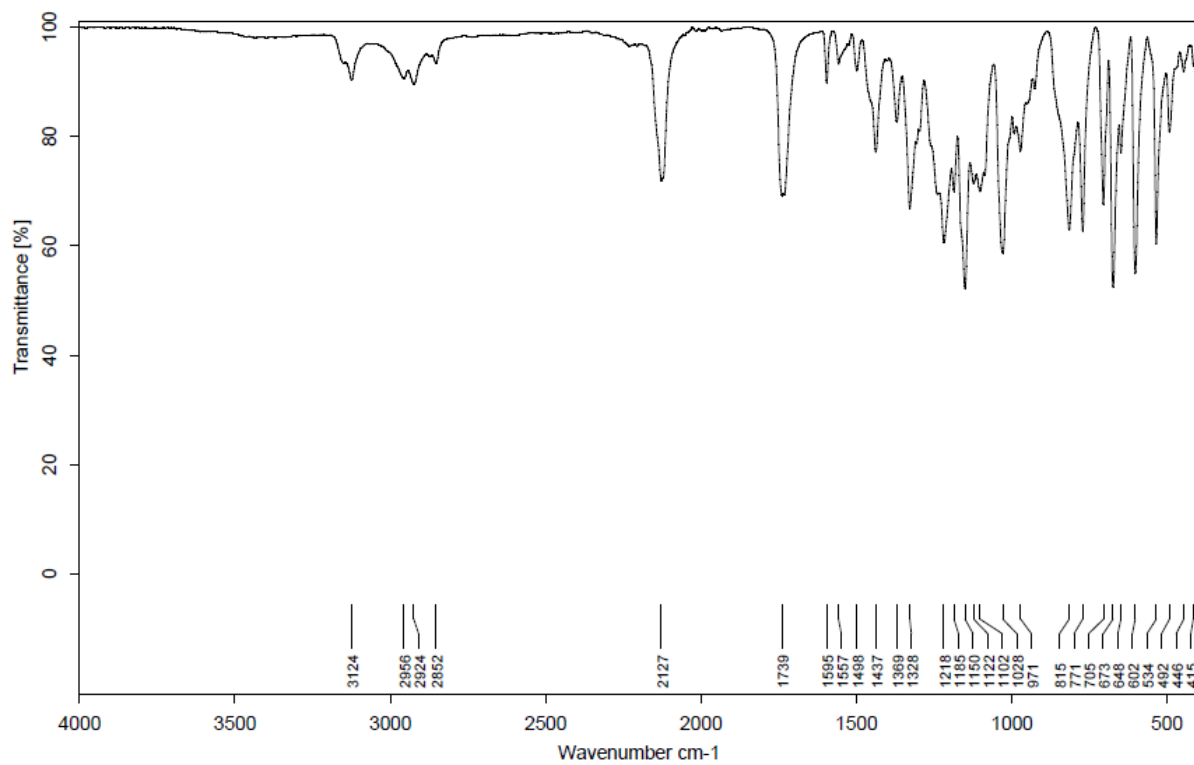

***rac* methyl 1-((4-phenyl-1*H*-1,2,3-triazol-1-yl)(4-tosyl-1*H*-1,2,3-triazol-1-yl)methyl)-1*H*-1,2,3-triazole-4-carboxylate (**6**)**

<sup>1</sup>H NMR(400MHz DMSO)

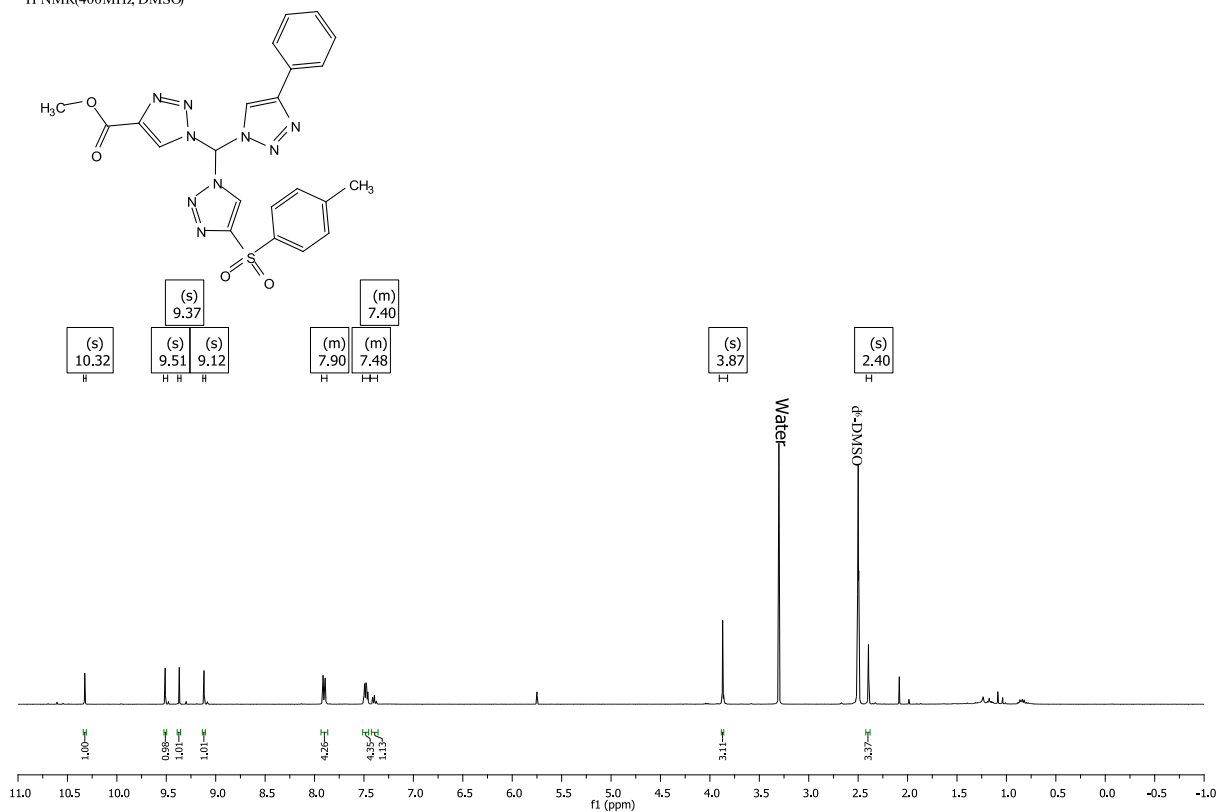

<sup>13</sup>C NMR(101MHz DMSO)

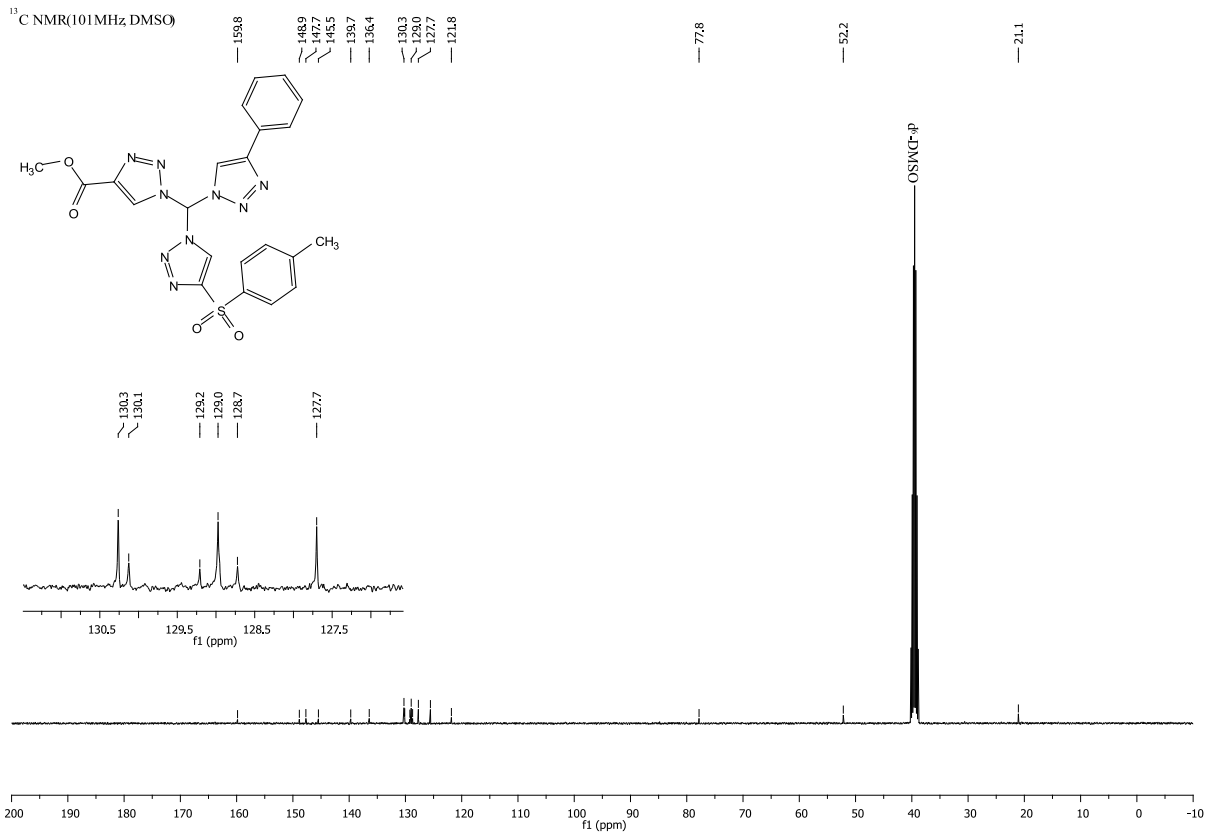

## Crystallographic data

### Crystallographic data for 2a

$R_1 = 4.45\%$

**Table 1:** Crystal data and structure refinement for 2a.

|                                             |                                                             |
|---------------------------------------------|-------------------------------------------------------------|
| Empirical formula                           | $C_{12}H_{14}N_6O_6$                                        |
| Formula weight                              | 338.29                                                      |
| Temperature/K                               | 150                                                         |
| Crystal system                              | monoclinic                                                  |
| Space group                                 | $P2_1/n$                                                    |
| a/Å                                         | 9.22642(18)                                                 |
| b/Å                                         | 9.71725(18)                                                 |
| c/Å                                         | 18.0546(4)                                                  |
| $\alpha/^\circ$                             | 90.00                                                       |
| $\beta/^\circ$                              | 101.6053(19)                                                |
| $\gamma/^\circ$                             | 90.00                                                       |
| Volume/Å <sup>3</sup>                       | 1585.60(5)                                                  |
| Z                                           | 4                                                           |
| $\rho_{\text{calc}}/\text{mg}/\text{mm}^3$  | 1.417                                                       |
| $\mu/\text{mm}^{-1}$                        | 0.116                                                       |
| F(000)                                      | 704.0                                                       |
| Crystal size/mm <sup>3</sup>                | $0.12 \times 0.09 \times 0.08$                              |
| 2 $\theta$ range for data collection        | 4.6 to 65.86°                                               |
| Index ranges                                | $-6 \leq h \leq 13, -10 \leq k \leq 14, -26 \leq l \leq 23$ |
| Reflections collected                       | 12718                                                       |
| Independent reflections                     | 5307[R(int) = 0.0231]                                       |
| Data/restraints/parameters                  | 5307/0/224                                                  |
| Goodness-of-fit on F <sup>2</sup>           | 1.024                                                       |
| Final R indexes [ $I \geq 2\sigma(I)$ ]     | $R_1 = 0.0445, wR_2 = 0.1101$                               |
| Final R indexes [all data]                  | $R_1 = 0.0579, wR_2 = 0.1201$                               |
| Largest diff. peak/hole / e Å <sup>-3</sup> | 0.54/-0.37                                                  |

**Table 2:** Fractional Atomic Coordinates ( $\times 10^4$ ) and Equivalent Isotropic Displacement Parameters ( $\text{\AA}^2 \times 10^3$ ) for **2a**.  $U_{\text{eq}}$  is defined as 1/3 of the trace of the orthogonalised  $U_{\text{ij}}$  tensor.

| Atom | <i>x</i>    | <i>y</i>   | <i>z</i>   | <b>U(eq)</b> |
|------|-------------|------------|------------|--------------|
| O2   | 4750.2(9)   | 3022.8(9)  | 1259.9(5)  | 24.35(18)    |
| O1   | 4055.1(11)  | 5184.6(10) | 881.5(5)   | 31.6(2)      |
| C6   | 3222.5(12)  | 4178.6(11) | 1919.3(6)  | 18.04(19)    |
| C5   | 3309.3(11)  | 3258.5(11) | 2500.8(6)  | 17.40(19)    |
| N2   | 1666.7(11)  | 4911.9(10) | 2585.8(6)  | 23.0(2)      |
| N4   | 2516.3(10)  | 3972.1(10) | 4240.1(5)  | 19.82(18)    |
| N6   | 3625.0(11)  | 4206.0(12) | 5394.2(6)  | 27.0(2)      |
| C1   | 1906.5(12)  | 3182.9(11) | 3571.0(6)  | 18.4(2)      |
| N5   | 3224.1(11)  | 3288.9(11) | 4869.0(6)  | 25.2(2)      |
| O3   | 4242.3(11)  | 6738.7(11) | 6210.2(5)  | 35.7(2)      |
| N1   | 2338.2(10)  | 3748.4(9)  | 2903.2(5)  | 17.61(18)    |
| O6   | -292.2(10)  | 2456.5(10) | 2800.5(5)  | 29.8(2)      |
| C10  | 3186.7(12)  | 5475.4(13) | 5108.8(6)  | 22.9(2)      |
| O4   | 3168.5(11)  | 7859.9(10) | 5152.2(5)  | 33.8(2)      |
| C7   | 4038.4(12)  | 4212.2(12) | 1295.4(6)  | 20.8(2)      |
| O5   | -487.6(10)  | 3522.7(11) | 3890.0(5)  | 33.0(2)      |
| C2   | 208.2(13)   | 3095.1(11) | 3447.6(6)  | 21.1(2)      |
| N3   | 2217.5(11)  | 5176.8(10) | 1990.1(6)  | 23.3(2)      |
| C9   | 2468.3(13)  | 5333.8(12) | 4371.0(6)  | 22.9(2)      |
| C8   | 5542.8(15)  | 2896.7(16) | 644.5(8)   | 33.3(3)      |
| C11  | 3590.6(13)  | 6730.7(14) | 5561.2(7)  | 26.9(2)      |
| C3   | -1894.0(16) | 2277.2(16) | 2554.5(10) | 39.7(3)      |
| C12  | 3617(2)     | 9144.1(17) | 5537.8(10) | 51.0(4)      |
| C4   | -2216.6(19) | 808.3(16)  | 2389.5(11) | 47.0(4)      |

**Table 3:** Anisotropic Displacement Parameters ( $\text{\AA}^2 \times 10^3$ ) for **2a**. The Anisotropic displacement factor exponent takes the form:  $-2\pi^2[h^2a^{*2}U_{11}+\dots+2hka \times b \times U_{12}]$

| Atom | $U_{11}$ | $U_{22}$ | $U_{33}$ | $U_{23}$ | $U_{13}$ | $U_{12}$ |
|------|----------|----------|----------|----------|----------|----------|
| O2   | 28.0(4)  | 27.3(4)  | 20.9(4)  | -0.5(3)  | 12.6(3)  | 1.0(3)   |
| O1   | 50.6(6)  | 24.8(4)  | 23.8(4)  | 2.5(3)   | 17.8(4)  | -5.6(4)  |
| C6   | 23.2(5)  | 16.5(4)  | 15.3(4)  | -1.3(3)  | 6.0(4)   | -2.5(4)  |
| C5   | 19.7(5)  | 16.7(5)  | 16.9(5)  | -1.2(3)  | 6.3(4)   | -0.6(4)  |
| N2   | 30.6(5)  | 18.0(4)  | 22.8(5)  | 4.3(3)   | 11.0(4)  | 5.4(4)   |
| N4   | 22.7(4)  | 22.3(4)  | 15.4(4)  | 1.6(3)   | 6.1(3)   | 3.7(3)   |
| N6   | 24.6(5)  | 37.0(6)  | 19.2(4)  | 2.2(4)   | 3.9(4)   | 0.9(4)   |
| C1   | 23.8(5)  | 17.1(5)  | 16.0(5)  | 1.2(4)   | 8.3(4)   | 1.7(4)   |
| N5   | 26.0(5)  | 31.3(5)  | 18.8(4)  | 6.7(4)   | 5.8(4)   | 3.7(4)   |
| O3   | 30.8(5)  | 51.2(6)  | 22.4(4)  | -8.5(4)  | -0.8(3)  | -4.0(4)  |
| N1   | 22.7(4)  | 15.9(4)  | 15.6(4)  | 1.2(3)   | 7.1(3)   | 1.5(3)   |
| O6   | 27.3(4)  | 29.4(5)  | 32.6(5)  | -9.8(4)  | 5.6(4)   | -4.4(3)  |
| C10  | 17.9(5)  | 32.5(6)  | 18.7(5)  | -2.8(4)  | 4.5(4)   | 1.7(4)   |
| O4   | 35.5(5)  | 33.0(5)  | 29.0(5)  | -10.0(4) | -2.7(4)  | 3.0(4)   |
| C7   | 26.2(5)  | 21.8(5)  | 15.3(5)  | -2.4(4)  | 6.4(4)   | -5.2(4)  |
| O5   | 27.5(4)  | 45.4(6)  | 29.0(5)  | -3.2(4)  | 12.8(4)  | 2.5(4)   |
| C2   | 24.9(5)  | 17.6(5)  | 22.2(5)  | 3.1(4)   | 7.9(4)   | -0.6(4)  |
| N3   | 32.0(5)  | 18.6(4)  | 21.3(4)  | 4.1(3)   | 10.4(4)  | 2.8(4)   |
| C9   | 25.6(5)  | 22.7(5)  | 20.1(5)  | -2.7(4)  | 4.4(4)   | 4.4(4)   |
| C8   | 35.2(7)  | 43.5(8)  | 26.8(6)  | -4.9(5)  | 19.3(5)  | -1.5(5)  |
| C11  | 19.4(5)  | 38.3(7)  | 22.9(5)  | -8.1(5)  | 4.3(4)   | 0.5(5)   |
| C3   | 27.5(6)  | 35.3(7)  | 53.0(9)  | -9.4(6)  | -0.2(6)  | -3.3(5)  |
| C12  | 63.8(11) | 36.6(8)  | 45.8(9)  | -16.7(7) | -5.4(8)  | 0.1(7)   |
| C4   | 39.7(8)  | 33.3(8)  | 64.8(11) | -13.2(7) | 2.7(7)   | -6.9(6)  |

**Table 4:** Bond Lengths for 2a.

| Atom | Atom | Length/Å   | Atom | Atom | Length/Å   |
|------|------|------------|------|------|------------|
| O2   | C7   | 1.3373(14) | N6   | C10  | 1.3663(17) |
| O2   | C8   | 1.4530(14) | C1   | N1   | 1.4517(13) |
| O1   | C7   | 1.2067(14) | C1   | C2   | 1.5400(16) |
| C6   | C5   | 1.3690(14) | O3   | C11  | 1.2048(15) |
| C6   | C7   | 1.4757(14) | O6   | C2   | 1.3213(14) |
| C6   | N3   | 1.3656(14) | O6   | C3   | 1.4655(16) |
| C5   | N1   | 1.3488(13) | C10  | C9   | 1.3702(16) |
| N2   | N1   | 1.3593(13) | C10  | C11  | 1.4736(17) |
| N2   | N3   | 1.3042(13) | O4   | C11  | 1.3360(17) |
| N4   | C1   | 1.4459(14) | O4   | C12  | 1.4482(18) |
| N4   | N5   | 1.3631(13) | O5   | C2   | 1.1955(14) |
| N4   | C9   | 1.3465(15) | C3   | C4   | 1.476(2)   |
| N6   | N5   | 1.2997(15) |      |      |            |

**Table 5:** Bond Angles for 2a.

| Atom | Atom | Atom | Angle/°    | Atom | Atom | Atom | Angle/°    |
|------|------|------|------------|------|------|------|------------|
| C7   | O2   | C8   | 115.92(10) | C2   | O6   | C3   | 118.39(10) |
| C5   | C6   | C7   | 129.77(10) | N6   | C10  | C9   | 108.94(11) |
| N3   | C6   | C5   | 109.16(9)  | N6   | C10  | C11  | 121.04(10) |
| N3   | C6   | C7   | 121.07(10) | C9   | C10  | C11  | 129.86(12) |
| N1   | C5   | C6   | 103.88(9)  | C11  | O4   | C12  | 114.76(11) |
| N3   | N2   | N1   | 106.96(9)  | O2   | C7   | C6   | 110.38(9)  |
| N5   | N4   | C1   | 118.58(9)  | O1   | C7   | O2   | 125.42(10) |
| C9   | N4   | C1   | 130.30(10) | O1   | C7   | C6   | 124.20(11) |
| C9   | N4   | N5   | 111.08(9)  | O6   | C2   | C1   | 108.56(9)  |
| N5   | N6   | C10  | 108.95(10) | O5   | C2   | C1   | 123.48(11) |
| N4   | C1   | N1   | 111.56(9)  | O5   | C2   | O6   | 127.94(11) |
| N4   | C1   | C2   | 111.34(9)  | N2   | N3   | C6   | 108.76(9)  |
| N1   | C1   | C2   | 110.00(9)  | N4   | C9   | C10  | 104.05(10) |
| N6   | N5   | N4   | 106.98(10) | O3   | C11  | C10  | 124.44(13) |
| C5   | N1   | N2   | 111.24(9)  | O3   | C11  | O4   | 124.42(12) |
| C5   | N1   | C1   | 129.55(9)  | O4   | C11  | C10  | 111.13(10) |
| N2   | N1   | C1   | 119.15(9)  | O6   | C3   | C4   | 109.04(12) |

**Table 6:** Hydrogen Atom Coordinates ( $\text{\AA} \times 10^4$ ) and Isotropic Displacement Parameters ( $\text{\AA}^2 \times 10^3$ ) for **2a**.

| Atom | <i>x</i> | <i>y</i> | <i>z</i> | U(eq) |
|------|----------|----------|----------|-------|
| H5   | 3913     | 2461     | 2598     | 21    |
| H9   | 2036     | 6035     | 4030     | 27    |
| H8A  | 4873     | 3109     | 164      | 50    |
| H8B  | 5914     | 1954     | 629      | 50    |
| H8C  | 6376     | 3542     | 725      | 50    |
| H3A  | -2258    | 2835     | 2096     | 48    |
| H3B  | -2404    | 2591     | 2957     | 48    |
| H12A | 3328     | 9913     | 5188     | 77    |
| H12B | 4693     | 9149     | 5715     | 77    |
| H12C | 3133     | 9239     | 5971     | 77    |
| H4A  | -1681    | 496      | 2003     | 70    |
| H4B  | -3282    | 687      | 2204     | 70    |
| H4C  | -1900    | 267      | 2852     | 70    |
| H1   | 2286(15) | 2271(15) | 3636(8)  | 18(3) |

Crystal structure determination of **2a**:

**Crystal Data** for  $\text{C}_{12}\text{H}_{14}\text{N}_6\text{O}_6$  ( $M = 338.29$ ): monoclinic, space group  $P2_1/n$  (no. 14),  $a = 9.22642(18) \text{ \AA}$ ,  $b = 9.71725(18) \text{ \AA}$ ,  $c = 18.0546(4) \text{ \AA}$ ,  $\beta = 101.6053(19)^\circ$ ,  $V = 1585.60(5) \text{ \AA}^3$ ,  $Z = 4$ ,  $T = 150 \text{ K}$ ,  $\mu(\text{Mo K}\alpha) = 0.116 \text{ mm}^{-1}$ ,  $D_{\text{calc}} = 1.417 \text{ g/mm}^3$ , 12718 reflections measured ( $4.6 \leq 2\theta \leq 65.86$ ), 5307 unique ( $R_{\text{int}} = 0.0231$ ) which were used in all calculations. The final  $R_1$  was 0.0445 ( $>2\sigma(I)$ ) and  $wR_2$  was 0.1201.

## Crystallographic data for 4a

$R_1 = 4.80\%$

**Table 1:** Crystal data and structure refinement for 4a.

|                                             |                                                              |
|---------------------------------------------|--------------------------------------------------------------|
| Empirical formula                           | $C_{31}H_{25}N_9O_6$                                         |
| Formula weight                              | 619.60                                                       |
| Temperature/K                               | 293                                                          |
| Crystal system                              | monoclinic                                                   |
| Space group                                 | $P2_1/n$                                                     |
| a/Å                                         | 14.6712(4)                                                   |
| b/Å                                         | 12.4890(8)                                                   |
| c/Å                                         | 17.0137(11)                                                  |
| $\alpha/^\circ$                             | 90.00                                                        |
| $\beta/^\circ$                              | 106.677(4)                                                   |
| $\gamma/^\circ$                             | 90.00                                                        |
| Volume/Å <sup>3</sup>                       | 2986.3(3)                                                    |
| Z                                           | 4                                                            |
| $\rho_{\text{calc}}/\text{mg}/\text{mm}^3$  | 1.378                                                        |
| $\mu/\text{mm}^{-1}$                        | 0.100                                                        |
| F(000)                                      | 1288.0                                                       |
| Crystal size/mm <sup>3</sup>                | $0.15 \times 0.11 \times 0.07$                               |
| 2 $\theta$ range for data collection        | 4.1 to 59.06°                                                |
| Index ranges                                | $-12 \leq h \leq 20, -15 \leq k \leq 16, -23 \leq l \leq 18$ |
| Reflections collected                       | 16696                                                        |
| Independent reflections                     | 6959[R(int) = 0.0177]                                        |
| Data/restraints/parameters                  | 6959/0/415                                                   |
| Goodness-of-fit on F <sup>2</sup>           | 1.014                                                        |
| Final R indexes [ $I \geq 2\sigma(I)$ ]     | $R_1 = 0.0480, wR_2 = 0.1126$                                |
| Final R indexes [all data]                  | $R_1 = 0.0778, wR_2 = 0.1298$                                |
| Largest diff. peak/hole / e Å <sup>-3</sup> | 0.40/-0.29                                                   |



**Table 2:** Fractional Atomic Coordinates ( $\times 10^4$ ) and Equivalent Isotropic Displacement Parameters ( $\text{\AA}^2 \times 10^3$ ) for **4a**.  $U_{\text{eq}}$  is defined as 1/3 of the trace of the orthogonalised  $U_{\text{ij}}$  tensor.

| Atom | x           | y          | z           | U(eq)     |
|------|-------------|------------|-------------|-----------|
| O4   | 2172.5(9)   | 1755.4(10) | 185.7(7)    | 49.9(3)   |
| N7   | 2150.1(9)   | 4270.4(11) | 1764.3(8)   | 35.5(3)   |
| N4   | 2246.1(9)   | 6082.6(10) | 1361.3(8)   | 35.3(3)   |
| N1   | 829.5(9)    | 5460.5(11) | 1628.2(8)   | 35.5(3)   |
| O2   | -2245.6(8)  | 6081.5(11) | 979.6(8)    | 50.9(3)   |
| N8   | 2744.9(11)  | 3796.0(12) | 2439.9(8)   | 47.6(4)   |
| C13  | 2629.1(12)  | 6983.5(13) | 440.6(11)   | 39.9(4)   |
| O5   | 3182.4(10)  | 8228.9(11) | -378.2(9)   | 63.3(4)   |
| C12  | 1972.8(12)  | 6281.2(13) | 553.3(10)   | 38.6(4)   |
| C22  | 2014.0(12)  | 3634.2(13) | 1102(1)     | 37.8(4)   |
| O6   | 2072.2(11)  | 6999.0(11) | -961.6(8)   | 58.4(4)   |
| N3   | -588.7(10)  | 5257.1(14) | 858.4(9)    | 52.8(4)   |
| N6   | 3280.4(11)  | 7177.3(13) | 1177.9(10)  | 53.7(4)   |
| C24  | 2637.9(12)  | 1735.7(14) | 979.9(10)   | 40.0(4)   |
| O3   | 3094.6(11)  | 988.7(10)  | 1334.7(8)   | 61.0(4)   |
| N9   | 2961.6(11)  | 2866.5(12) | 2207.8(9)   | 49.5(4)   |
| N2   | 281.4(11)   | 4951.8(15) | 953.3(10)   | 55.8(4)   |
| C26  | 1415.2(14)  | 140.8(16)  | -526.7(12)  | 51.4(5)   |
| C3   | -606.1(11)  | 5960.3(13) | 1461.9(9)   | 36.3(4)   |
| C23  | 2523.4(11)  | 2739.3(13) | 1391.2(9)   | 35.9(4)   |
| C1   | 1858.8(11)  | 5362.2(12) | 1851.6(9)   | 34.9(4)   |
| N5   | 3056.5(10)  | 6629.0(13) | 1740.9(10)  | 50.4(4)   |
| C14  | 2678.9(13)  | 7490.7(14) | -329.3(12)  | 46.8(4)   |
| C6   | -3844.2(12) | 6353.8(15) | 169.5(11)   | 45.4(4)   |
| C11  | -4397.3(14) | 7206.3(18) | -208.5(14)  | 61.4(5)   |
| C2   | 297.3(12)   | 6098.0(13) | 1953.4(10)  | 39.5(4)   |
| C25  | 2284.7(15)  | 823.8(17)  | -302.9(12)  | 58.2(5)   |
| C5   | -3173.7(13) | 6474.2(19) | 1010.7(12)  | 56.3(5)   |
| C7   | -3929.8(14) | 5396.5(18) | -241.6(14)  | 59.7(5)   |
| O1   | -1502.9(10) | 7110.2(12) | 2051.9(9)   | 63.3(4)   |
| C4   | -1490.8(12) | 6452.3(14) | 1542.3(10)  | 40.9(4)   |
| C29  | -155(3)     | -1134(3)   | -1061(3)    | 118.7(15) |
| C31  | 769.7(18)   | 283(2)     | -1292.1(15) | 80.4(7)   |
| C16  | 1456.5(15)  | 6658.4(15) | -2397.3(11) | 49.1(5)   |
| C30  | -9(2)       | -352(4)    | -1554(2)    | 117.1(13) |
| C15  | 1982.6(18)  | 7448.9(18) | -1768.9(12) | 67.1(6)   |
| C28  | 454(3)      | -1290(2)   | -279(3)     | 113.3(13) |
| C27  | 1260.3(19)  | -626.1(18) | -13.7(18)   | 74.8(7)   |
| C17  | 1939.2(16)  | 5842.3(17) | -2650.3(14) | 60.8(5)   |
| C21  | 494.3(18)   | 6735.3(18) | -2755.9(16) | 73.0(7)   |
| C20  | 25(2)       | 6027(2)    | -3353.0(19) | 92.9(9)   |
| C18  | 1464(2)     | 5129.7(18) | -3247.7(16) | 74.8(7)   |

|     |             |         |             |         |
|-----|-------------|---------|-------------|---------|
| C19 | 509(2)      | 5236(2) | -3595.8(16) | 83.9(8) |
| C8  | -4541.2(17) | 5298(2) | -1025.9(16) | 78.0(7) |
| C10 | -5006.9(17) | 7107(2) | -987.4(15)  | 77.4(7) |
| C9  | -5073.2(16) | 6166(3) | -1391.7(15) | 81.1(8) |

**Table 3:** Anisotropic Displacement Parameters ( $\text{\AA}^2 \times 10^3$ ) for **4a**. The Anisotropic displacement factor exponent takes the form:  $-2\pi^2[h^2a^{*2}U_{11}+\dots+2hka \times b \times U_{12}]$

| Atom | $U_{11}$ | $U_{22}$ | $U_{33}$ | $U_{23}$  | $U_{13}$ | $U_{12}$ |
|------|----------|----------|----------|-----------|----------|----------|
| O4   | 59.5(8)  | 46.5(7)  | 38.8(7)  | -5.9(5)   | 6.3(6)   | 6.4(6)   |
| N7   | 36.0(7)  | 37.8(7)  | 29.2(7)  | 0.2(5)    | 3.8(5)   | 0.8(6)   |
| N4   | 31.1(7)  | 36.2(7)  | 35.6(7)  | -5.5(6)   | 4.7(5)   | -4.3(5)  |
| N1   | 32.1(7)  | 42.3(7)  | 29.6(7)  | -6.1(6)   | 4.9(5)   | -3.0(6)  |
| O2   | 32.6(6)  | 67.1(8)  | 49.2(7)  | -12.5(6)  | 5.6(5)   | 5.6(6)   |
| N8   | 54.8(9)  | 50.2(9)  | 30.4(7)  | 3.0(6)    | 0.4(6)   | 8.0(7)   |
| C13  | 38.4(9)  | 33.9(8)  | 47.8(10) | -1.9(7)   | 13.0(7)  | -1.6(7)  |
| O5   | 66.3(9)  | 53.1(8)  | 76.5(10) | 4.3(7)    | 29.9(8)  | -18.2(7) |
| C12  | 38.3(9)  | 38.4(9)  | 35.8(9)  | -3.2(7)   | 5.1(7)   | -4.6(7)  |
| C22  | 40.4(9)  | 40.1(9)  | 29.1(8)  | -2.4(7)   | 4.2(7)   | 1.1(7)   |
| O6   | 76.8(10) | 55.2(8)  | 46.0(7)  | 2.3(6)    | 22.2(7)  | -20.7(7) |
| N3   | 32.6(8)  | 77.1(11) | 46.2(9)  | -23.0(8)  | 7.3(7)   | -3.9(7)  |
| N6   | 43.9(9)  | 54.4(9)  | 59.3(10) | -3.0(8)   | 9.3(8)   | -16.3(7) |
| C24  | 40.0(9)  | 40.8(9)  | 38.6(9)  | 3.7(7)    | 10.1(7)  | 1.5(7)   |
| O3   | 80(1)    | 47.8(8)  | 48.9(8)  | 4.4(6)    | 8.6(7)   | 20.2(7)  |
| N9   | 60(1)    | 46.1(9)  | 36.3(8)  | 3.1(7)    | 4.1(7)   | 10.8(7)  |
| N2   | 34.1(8)  | 81.9(12) | 47.5(9)  | -31.8(8)  | 5.7(7)   | -4.1(8)  |
| C26  | 54.4(12) | 47.4(10) | 53.5(11) | -14.6(9)  | 17.1(9)  | 7.4(9)   |
| C3   | 37.2(9)  | 40.1(8)  | 30.8(8)  | -1.7(7)   | 8.7(7)   | -2.3(7)  |
| C23  | 36.0(9)  | 38.6(8)  | 31.9(8)  | 3.5(7)    | 8.0(7)   | -0.4(7)  |
| C1   | 32.5(8)  | 39.6(9)  | 29.5(8)  | -4.6(7)   | 4.1(6)   | -1.3(7)  |
| N5   | 38.5(8)  | 55.5(9)  | 49.9(9)  | -6.3(7)   | 0.8(7)   | -14.7(7) |
| C14  | 48.2(10) | 38.5(9)  | 59.0(11) | -1.7(8)   | 23.8(9)  | -0.8(8)  |
| C6   | 30.3(9)  | 56.7(11) | 50.7(10) | -3.2(9)   | 14.0(8)  | 4.2(8)   |
| C11  | 49.7(12) | 58.2(12) | 72.7(14) | -3.2(11)  | 11.6(10) | 7.5(10)  |
| C2   | 39.3(9)  | 41.5(9)  | 35.6(8)  | -8.4(7)   | 7.4(7)   | 0.4(7)   |
| C25  | 65.5(13) | 62.4(12) | 48.6(11) | -16.2(10) | 19.6(10) | 2.1(10)  |
| C5   | 36.1(10) | 79.8(14) | 53.8(12) | -7.8(10)  | 14.0(8)  | 9.9(9)   |
| C7   | 46.2(11) | 62.6(13) | 69.1(14) | -8.6(10)  | 14.4(10) | 10.2(9)  |
| O1   | 50.6(8)  | 74.8(10) | 60.5(9)  | -25.8(8)  | 9.7(7)   | 9.0(7)   |
| C4   | 38.6(9)  | 45.6(9)  | 37.1(9)  | 0.6(8)    | 8.6(7)   | 0.4(7)   |
| C29  | 76(2)    | 106(3)   | 192(4)   | -71(3)    | 69(3)    | -31(2)   |
| C31  | 70.0(16) | 107(2)   | 58.6(14) | -19.0(13) | 9.4(12)  | -1.5(14) |
| C16  | 62.5(12) | 46(1)    | 43.4(10) | 10.2(8)   | 22.3(9)  | 1.8(9)   |
| C30  | 71(2)    | 165(4)   | 111(3)   | -64(3)    | 19.0(18) | -19(2)   |

|     |          |          |           |           |           |           |
|-----|----------|----------|-----------|-----------|-----------|-----------|
| C15 | 94.8(17) | 59.2(13) | 52.5(12)  | 9.4(10)   | 29.5(12)  | -16.6(12) |
| C28 | 124(3)   | 55.7(16) | 199(4)    | -6(2)     | 108(3)    | 7.7(18)   |
| C27 | 81.8(17) | 50.6(13) | 104.7(19) | 3.3(13)   | 47.4(15)  | 15.2(12)  |
| C17 | 60.5(13) | 58.8(13) | 70.8(14)  | 16.1(11)  | 31.0(11)  | 10.3(10)  |
| C21 | 70.5(16) | 56.1(13) | 92.3(18)  | -1.9(12)  | 23.3(13)  | 18.7(11)  |
| C20 | 74.3(18) | 67.9(16) | 111(2)    | 0.2(15)   | -13.6(15) | 12.2(13)  |
| C18 | 115(2)   | 47.1(12) | 78.6(16)  | 5.1(12)   | 54.2(16)  | 14.5(13)  |
| C19 | 119(2)   | 53.7(14) | 64.8(15)  | 2.8(11)   | 3.9(15)   | -0.5(14)  |
| C8  | 55.1(14) | 97.7(19) | 79.0(16)  | -38.8(15) | 15.9(12)  | -1.9(13)  |
| C10 | 57.6(14) | 94.1(19) | 70.9(16)  | 12.9(14)  | 3.2(12)   | 23.0(13)  |
| C9  | 47.3(13) | 131(2)   | 56.6(14)  | -13.4(15) | 1.3(10)   | 10.0(14)  |

**Table 4:** Bond Lengths for **4a**.

| <b>Atom</b> | <b>Atom</b> | <b>Length/Å</b> | <b>Atom</b> | <b>Atom</b> | <b>Length/Å</b> |
|-------------|-------------|-----------------|-------------|-------------|-----------------|
| O4          | C24         | 1.328(2)        | N9          | C23         | 1.362(2)        |
| O4          | C25         | 1.466(2)        | C26         | C25         | 1.490(3)        |
| N7          | N8          | 1.3632(18)      | C26         | C31         | 1.384(3)        |
| N7          | C22         | 1.346(2)        | C26         | C27         | 1.358(3)        |
| N7          | C1          | 1.449(2)        | C3          | C2          | 1.360(2)        |
| N4          | C12         | 1.340(2)        | C3          | C4          | 1.477(2)        |
| N4          | C1          | 1.449(2)        | C6          | C11         | 1.381(3)        |
| N4          | N5          | 1.3623(18)      | C6          | C5          | 1.494(3)        |
| N1          | N2          | 1.3560(18)      | C6          | C7          | 1.373(3)        |
| N1          | C1          | 1.453(2)        | C11         | C10         | 1.375(3)        |
| N1          | C2          | 1.341(2)        | C7          | C8          | 1.383(3)        |
| O2          | C5          | 1.462(2)        | O1          | C4          | 1.198(2)        |
| O2          | C4          | 1.323(2)        | C29         | C30         | 1.344(5)        |
| N8          | N9          | 1.295(2)        | C29         | C28         | 1.388(5)        |
| C13         | C12         | 1.356(2)        | C31         | C30         | 1.356(4)        |
| C13         | N6          | 1.363(2)        | C16         | C15         | 1.497(3)        |
| C13         | C14         | 1.476(3)        | C16         | C17         | 1.379(3)        |
| O5          | C14         | 1.199(2)        | C16         | C21         | 1.371(3)        |
| C22         | C23         | 1.356(2)        | C28         | C27         | 1.409(4)        |
| O6          | C14         | 1.333(2)        | C17         | C18         | 1.380(3)        |
| O6          | C15         | 1.455(2)        | C21         | C20         | 1.374(4)        |
| N3          | N2          | 1.297(2)        | C20         | C19         | 1.349(4)        |
| N3          | C3          | 1.357(2)        | C18         | C19         | 1.362(4)        |
| N6          | N5          | 1.294(2)        | C8          | C9          | 1.376(4)        |
| C24         | O3          | 1.205(2)        | C10         | C9          | 1.351(4)        |
| C24         | C23         | 1.468(2)        |             |             |                 |

**Table 5:** Bond Angles for **4a**.

| <b>Atom</b> | <b>Atom</b> | <b>Atom</b> | <b>Angle/°</b> | <b>Atom</b> | <b>Atom</b> | <b>Atom</b> | <b>Angle/°</b> |
|-------------|-------------|-------------|----------------|-------------|-------------|-------------|----------------|
| C24         | O4          | C25         | 116.97(14)     | N4          | C1          | N7          | 110.44(13)     |
| N8          | N7          | C1          | 117.31(12)     | N4          | C1          | N1          | 110.29(12)     |
| C22         | N7          | N8          | 110.77(13)     | N6          | N5          | N4          | 106.66(14)     |
| C22         | N7          | C1          | 131.60(13)     | O5          | C14         | C13         | 125.46(18)     |
| C12         | N4          | C1          | 130.85(13)     | O5          | C14         | O6          | 125.46(18)     |
| C12         | N4          | N5          | 110.91(14)     | O6          | C14         | C13         | 109.08(15)     |
| N5          | N4          | C1          | 118.11(13)     | C11         | C6          | C5          | 120.41(18)     |
| N2          | N1          | C1          | 120.08(13)     | C7          | C6          | C11         | 118.61(18)     |
| C2          | N1          | N2          | 110.71(13)     | C7          | C6          | C5          | 120.98(18)     |
| C2          | N1          | C1          | 128.82(13)     | C10         | C11         | C6          | 120.8(2)       |
| C4          | O2          | C5          | 116.82(14)     | N1          | C2          | C3          | 104.56(14)     |
| N9          | N8          | N7          | 106.63(13)     | O4          | C25         | C26         | 111.83(16)     |
| C12         | C13         | N6          | 108.87(15)     | O2          | C5          | C6          | 107.20(15)     |
| C12         | C13         | C14         | 128.40(16)     | C6          | C7          | C8          | 120.5(2)       |
| N6          | C13         | C14         | 122.73(15)     | O2          | C4          | C3          | 111.26(14)     |
| N4          | C12         | C13         | 104.43(14)     | O1          | C4          | O2          | 125.50(16)     |
| N7          | C22         | C23         | 104.41(14)     | O1          | C4          | C3          | 123.23(16)     |
| C14         | O6          | C15         | 116.27(15)     | C30         | C29         | C28         | 121.8(3)       |
| N2          | N3          | C3          | 109.12(14)     | C30         | C31         | C26         | 121.2(3)       |
| N5          | N6          | C13         | 109.11(14)     | C17         | C16         | C15         | 120.3(2)       |
| O4          | C24         | C23         | 111.93(14)     | C21         | C16         | C15         | 121.7(2)       |
| O3          | C24         | O4          | 125.01(16)     | C21         | C16         | C17         | 117.9(2)       |
| O3          | C24         | C23         | 123.05(16)     | C29         | C30         | C31         | 119.3(4)       |
| N8          | N9          | C23         | 109.29(13)     | O6          | C15         | C16         | 107.94(16)     |
| N3          | N2          | N1          | 106.91(14)     | C29         | C28         | C27         | 118.3(3)       |
| C31         | C26         | C25         | 118.1(2)       | C26         | C27         | C28         | 119.3(3)       |
| C27         | C26         | C25         | 121.9(2)       | C16         | C17         | C18         | 120.7(2)       |
| C27         | C26         | C31         | 120.0(2)       | C16         | C21         | C20         | 121.2(2)       |
| N3          | C3          | C2          | 108.69(15)     | C19         | C20         | C21         | 120.1(3)       |
| N3          | C3          | C4          | 123.17(14)     | C19         | C18         | C17         | 119.8(2)       |
| C2          | C3          | C4          | 128.13(15)     | C20         | C19         | C18         | 120.3(2)       |
| C22         | C23         | C24         | 131.08(15)     | C9          | C8          | C7          | 119.5(2)       |
| C22         | C23         | N9          | 108.87(14)     | C9          | C10         | C11         | 120.1(2)       |
| N9          | C23         | C24         | 120.03(14)     | C10         | C9          | C8          | 120.4(2)       |
| N7          | C1          | N1          | 111.57(12)     |             |             |             |                |

**Table 6:** Hydrogen Atom Coordinates ( $\text{\AA}\times 10^4$ ) and Isotropic Displacement Parameters ( $\text{\AA}^2\times 10^3$ ) for **4a**.

| Atom | x     | y     | z     | U(eq) |
|------|-------|-------|-------|-------|
| H12  | 1451  | 6001  | 159   | 46    |
| H22  | 1652  | 3776  | 567   | 45    |
| H1   | 2115  | 5569  | 2429  | 42    |
| H11  | -4357 | 7856  | 67    | 74    |
| H2   | 500   | 6536  | 2412  | 47    |
| H25A | 2822  | 401   | 7     | 70    |
| H25B | 2419  | 1067  | -800  | 70    |
| H5A  | -3129 | 7220  | 1177  | 68    |
| H5B  | -3396 | 6062  | 1403  | 68    |
| H7   | -3574 | 4809  | 9     | 72    |
| H29  | -678  | -1583 | -1250 | 142   |
| H31  | 872   | 824   | -1633 | 97    |
| H30  | -437  | -247  | -2070 | 141   |
| H15A | 2608  | 7585  | -1835 | 81    |
| H15B | 1637  | 8121  | -1834 | 81    |
| H28  | 333   | -1821 | 62    | 136   |
| H27  | 1682  | -712  | 507   | 90    |
| H17  | 2592  | 5771  | -2416 | 73    |
| H21  | 153   | 7277  | -2592 | 88    |
| H20  | -628  | 6093  | -3590 | 111   |
| H18  | 1795  | 4579  | -3412 | 90    |
| H19  | 189   | 4760  | -4002 | 101   |
| H8   | -4592 | 4650  | -1304 | 94    |
| H10  | -5374 | 7688  | -1236 | 93    |
| H9   | -5481 | 6104  | -1921 | 97    |

Crystal structure determination of **4a**:

**Crystal Data** for  $\text{C}_{31}\text{H}_{25}\text{N}_9\text{O}_6$  ( $M = 619.60$ ): monoclinic, space group  $P2_1/n$  (no. 14),  $a = 14.6712(4)$   $\text{\AA}$ ,  $b = 12.4890(8)$   $\text{\AA}$ ,  $c = 17.0137(11)$   $\text{\AA}$ ,  $\beta = 106.677(4)^\circ$ ,  $V = 2986.3(3)$   $\text{\AA}^3$ ,  $Z = 4$ ,  $T = 293$  K,  $\mu(\text{Mo K}\alpha) = 0.100$   $\text{mm}^{-1}$ ,  $D_{\text{calc}} = 1.378$   $\text{g/mm}^3$ , 16696 reflections measured ( $4.1 \leq 2\theta \leq 59.06$ ), 6959 unique ( $R_{\text{int}} = 0.0177$ ) which were used in all calculations. The final  $R_1$  was 0.0480 ( $>2\sigma(I)$ ) and  $wR_2$  was 0.1298.

### **Experimental:**

The crystal was kept at 150 K during data collection. Using Olex2<sup>[1]</sup>, the structure was solved with the ShelXS<sup>[2]</sup> structure solution program using Direct Methods and refined with the ShelXL<sup>[3]</sup> refinement package using Least Squares minimization.

[1] O. V. Dolomanov, L. J. Bourhis, R. J. Gildea, J. A. K. Howard and H. Puschmann, OLEX2: a complete structure solution, refinement and analysis program. *J. Appl. Cryst.* **2009**, 42, 339.

[2] SHELXS, G.M. Sheldrick, *Acta Cryst.* **2008**, A64, 112.

[3] SHELXL, G.M. Sheldrick, *Acta Cryst.* **2008**, A64, 112.
